# Supplementary material for: The challenge of managing the commercial harvesting of the sea urchin Paracentrotus lividus: advanced approaches are required
Source: PeerJ. 2020 Oct 8;8:e10093. doi: 10.7717/peerj.10093 (PMC7548073; doi:10.7717/peerj.10093)
Supplement: Supplemental Information 2 [file peerj-08-10093-s002.xlsx]

## Sheet: general tab
id	site	Longitud	Latitud	sector	calcareous (Kmq)	basalt (Kmq)	granite (Kmq)	patchy meadow (Kmq)	continuous meadow(Kmq)	other (Kmq)	sand (Kmq)	year	depth	station	Protection z	type of habitat	surface (kmq)	perimeter (kmq)	NP	PD	LSI	current speed (m/s)	class size	density (ind/mq)
1	scaesali	452116	4.43394e+06	1	4.52149	0	0	7.18737	0	0	0.997691	2005	deep	1	out	calcari	1.079	22.092	63	1.0128	15.6728	0.075871	a	5.2
2	scaesali	452116	4.43394e+06	1	4.52149	0	0	7.18737	0	0	0.997691	2005	deep	1	out	calcari	1.079	22.092	63	1.0128	15.6728	0.075871	b	1.93
3	scaesali	452116	4.43394e+06	1	4.52149	0	0	7.18737	0	0	0.997691	2005	deep	1	out	calcari	1.079	22.092	63	1.0128	15.6728	0.075871	c	2.73
4	scaesali	452116	4.43394e+06	1	4.52149	0	0	7.18737	0	0	0.997691	2005	deep	1	out	calcari	1.079	22.092	63	1.0128	15.6728	0.075871	d	2.4
5	scaesali	452116	4.43394e+06	1	4.52149	0	0	7.18737	0	0	0.997691	2005	deep	1	out	calcari	1.079	22.092	63	1.0128	15.6728	0.075871	e	1.86667
6	scaesali	452116	4.43394e+06	1	4.52149	0	0	7.18737	0	0	0.997691	2005	deep	1	out	calcari	1.079	22.092	63	1.0128	15.6728	0.075871	f	1
7	scaesali	452116	4.43394e+06	1	4.52149	0	0	7.18737	0	0	0.997691	2005	deep	1	out	calcari	1.079	22.092	63	1.0128	15.6728	0.075871	g	0
8	scaesali	452116	4.43394e+06	1	4.52149	0	0	7.18737	0	0	0.997691	2005	deep	1	out	calcari	1.079	22.092	63	1.0128	15.6728	0.075871	tot	12.5
9	scaesali	451459	4.43379e+06	1	4.52149	0	0	7.18737	0	0	0.997691	2005	deep	2	out	calcari	1.079	22.092	63	1.0128	15.6728	0.0721208	a	2.47
10	scaesali	451459	4.43379e+06	1	4.52149	0	0	7.18737	0	0	0.997691	2005	deep	2	out	calcari	1.079	22.092	63	1.0128	15.6728	0.0721208	b	3.4
11	scaesali	451459	4.43379e+06	1	4.52149	0	0	7.18737	0	0	0.997691	2005	deep	2	out	calcari	1.079	22.092	63	1.0128	15.6728	0.0721208	c	3.47
12	scaesali	451459	4.43379e+06	1	4.52149	0	0	7.18737	0	0	0.997691	2005	deep	2	out	calcari	1.079	22.092	63	1.0128	15.6728	0.0721208	d	2.6
13	scaesali	451459	4.43379e+06	1	4.52149	0	0	7.18737	0	0	0.997691	2005	deep	2	out	calcari	1.079	22.092	63	1.0128	15.6728	0.0721208	e	2.53333
14	scaesali	451459	4.43379e+06	1	4.52149	0	0	7.18737	0	0	0.997691	2005	deep	2	out	calcari	1.079	22.092	63	1.0128	15.6728	0.0721208	f	0.733333
15	scaesali	451459	4.43379e+06	1	4.52149	0	0	7.18737	0	0	0.997691	2005	deep	2	out	calcari	1.079	22.092	63	1.0128	15.6728	0.0721208	g	0
16	scaesali	451459	4.43379e+06	1	4.52149	0	0	7.18737	0	0	0.997691	2005	deep	2	out	calcari	1.079	22.092	63	1.0128	15.6728	0.0721208	tot	12.27
17	scaesali	450884	4.43346e+06	1	4.52149	0	0	7.18737	0	0	0.997691	2005	deep	3	out	calcari	1.079	22.092	63	1.0128	15.6728	0.0510989	a	1.47
18	scaesali	450884	4.43346e+06	1	4.52149	0	0	7.18737	0	0	0.997691	2005	deep	3	out	calcari	1.079	22.092	63	1.0128	15.6728	0.0510989	b	1.6
19	scaesali	450884	4.43346e+06	1	4.52149	0	0	7.18737	0	0	0.997691	2005	deep	3	out	calcari	1.079	22.092	63	1.0128	15.6728	0.0510989	c	1.47
20	scaesali	450884	4.43346e+06	1	4.52149	0	0	7.18737	0	0	0.997691	2005	deep	3	out	calcari	1.079	22.092	63	1.0128	15.6728	0.0510989	d	1.46667
21	scaesali	450884	4.43346e+06	1	4.52149	0	0	7.18737	0	0	0.997691	2005	deep	3	out	calcari	1.079	22.092	63	1.0128	15.6728	0.0510989	e	0.866667
22	scaesali	450884	4.43346e+06	1	4.52149	0	0	7.18737	0	0	0.997691	2005	deep	3	out	calcari	1.079	22.092	63	1.0128	15.6728	0.0510989	f	1.06667
23	scaesali	450884	4.43346e+06	1	4.52149	0	0	7.18737	0	0	0.997691	2005	deep	3	out	calcari	1.079	22.092	63	1.0128	15.6728	0.0510989	g	0.0666667
24	scaesali	450884	4.43346e+06	1	4.52149	0	0	7.18737	0	0	0.997691	2005	deep	3	out	calcari	1.079	22.092	63	1.0128	15.6728	0.0510989	tot	6.27
25	scaesali	450685	4.43344e+06	1	4.52149	0	0	7.18737	0	0	0.997691	2005	deep	4	out	posiroccia	3.817	46.926	10	0.1608	11.5144	0.0461604	a	0
26	scaesali	450685	4.43344e+06	1	4.52149	0	0	7.18737	0	0	0.997691	2005	deep	4	out	posiroccia	3.817	46.926	10	0.1608	11.5144	0.0461604	b	0
27	scaesali	450685	4.43344e+06	1	4.52149	0	0	7.18737	0	0	0.997691	2005	deep	4	out	posiroccia	3.817	46.926	10	0.1608	11.5144	0.0461604	c	0.07
28	scaesali	450685	4.43344e+06	1	4.52149	0	0	7.18737	0	0	0.997691	2005	deep	4	out	posiroccia	3.817	46.926	10	0.1608	11.5144	0.0461604	d	0.133333
29	scaesali	450685	4.43344e+06	1	4.52149	0	0	7.18737	0	0	0.997691	2005	deep	4	out	posiroccia	3.817	46.926	10	0.1608	11.5144	0.0461604	e	0.8
30	scaesali	450685	4.43344e+06	1	4.52149	0	0	7.18737	0	0	0.997691	2005	deep	4	out	posiroccia	3.817	46.926	10	0.1608	11.5144	0.0461604	f	0.0666667
31	scaesali	450685	4.43344e+06	1	4.52149	0	0	7.18737	0	0	0.997691	2005	deep	4	out	posiroccia	3.817	46.926	10	0.1608	11.5144	0.0461604	g	0
32	scaesali	450685	4.43344e+06	1	4.52149	0	0	7.18737	0	0	0.997691	2005	deep	4	out	posiroccia	3.817	46.926	10	0.1608	11.5144	0.0461604	tot	0.57
33	scaesali	450560	4.43317e+06	1	4.52149	0	0	7.18737	0	0	0.997691	2005	deep	5	out	posiroccia	3.817	46.926	10	0.1608	11.5144	0.0367164	a	0
34	scaesali	450560	4.43317e+06	1	4.52149	0	0	7.18737	0	0	0.997691	2005	deep	5	out	posiroccia	3.817	46.926	10	0.1608	11.5144	0.0367164	b	0
35	scaesali	450560	4.43317e+06	1	4.52149	0	0	7.18737	0	0	0.997691	2005	deep	5	out	posiroccia	3.817	46.926	10	0.1608	11.5144	0.0367164	c	0.13
36	scaesali	450560	4.43317e+06	1	4.52149	0	0	7.18737	0	0	0.997691	2005	deep	5	out	posiroccia	3.817	46.926	10	0.1608	11.5144	0.0367164	d	0.533333
37	scaesali	450560	4.43317e+06	1	4.52149	0	0	7.18737	0	0	0.997691	2005	deep	5	out	posiroccia	3.817	46.926	10	0.1608	11.5144	0.0367164	e	2.93333
38	scaesali	450560	4.43317e+06	1	4.52149	0	0	7.18737	0	0	0.997691	2005	deep	5	out	posiroccia	3.817	46.926	10	0.1608	11.5144	0.0367164	f	1
39	scaesali	450560	4.43317e+06	1	4.52149	0	0	7.18737	0	0	0.997691	2005	deep	5	out	posiroccia	3.817	46.926	10	0.1608	11.5144	0.0367164	g	0
40	scaesali	450560	4.43317e+06	1	4.52149	0	0	7.18737	0	0	0.997691	2005	deep	5	out	posiroccia	3.817	46.926	10	0.1608	11.5144	0.0367164	tot	2.37
41	scaesali	450386	4.433e+06	1	4.52149	0	0	7.18737	0	0	0.997691	2005	deep	6	out	posiroccia	3.817	46.926	10	0.1608	11.5144	0.0316134	a	0
42	scaesali	450386	4.433e+06	1	4.52149	0	0	7.18737	0	0	0.997691	2005	deep	6	out	posiroccia	3.817	46.926	10	0.1608	11.5144	0.0316134	b	0
43	scaesali	450386	4.433e+06	1	4.52149	0	0	7.18737	0	0	0.997691	2005	deep	6	out	posiroccia	3.817	46.926	10	0.1608	11.5144	0.0316134	c	0.07
44	scaesali	450386	4.433e+06	1	4.52149	0	0	7.18737	0	0	0.997691	2005	deep	6	out	posiroccia	3.817	46.926	10	0.1608	11.5144	0.0316134	d	0.466667
45	scaesali	450386	4.433e+06	1	4.52149	0	0	7.18737	0	0	0.997691	2005	deep	6	out	posiroccia	3.817	46.926	10	0.1608	11.5144	0.0316134	e	0.6
46	scaesali	450386	4.433e+06	1	4.52149	0	0	7.18737	0	0	0.997691	2005	deep	6	out	posiroccia	3.817	46.926	10	0.1608	11.5144	0.0316134	f	0.0666667
47	scaesali	450386	4.433e+06	1	4.52149	0	0	7.18737	0	0	0.997691	2005	deep	6	out	posiroccia	3.817	46.926	10	0.1608	11.5144	0.0316134	g	0.0666667
48	scaesali	450386	4.433e+06	1	4.52149	0	0	7.18737	0	0	0.997691	2005	deep	6	out	posiroccia	3.817	46.926	10	0.1608	11.5144	0.0316134	tot	0.67
49	supallosu	449638	4.43403e+06	1	4.52149	0	0	7.18737	0	0	0.997691	2005	deep	6	out	calcari	2.448	50.636	63	1.0128	15.6728	0.06039	a	3.87
50	supallosu	449638	4.43403e+06	1	4.52149	0	0	7.18737	0	0	0.997691	2005	deep	6	out	calcari	2.448	50.636	63	1.0128	15.6728	0.06039	b	3.07
51	supallosu	449638	4.43403e+06	1	4.52149	0	0	7.18737	0	0	0.997691	2005	deep	6	out	calcari	2.448	50.636	63	1.0128	15.6728	0.06039	c	2.13
52	supallosu	449638	4.43403e+06	1	4.52149	0	0	7.18737	0	0	0.997691	2005	deep	6	out	calcari	2.448	50.636	63	1.0128	15.6728	0.06039	d	2.26667
53	supallosu	449638	4.43403e+06	1	4.52149	0	0	7.18737	0	0	0.997691	2005	deep	6	out	calcari	2.448	50.636	63	1.0128	15.6728	0.06039	e	1.33333
54	supallosu	449638	4.43403e+06	1	4.52149	0	0	7.18737	0	0	0.997691	2005	deep	6	out	calcari	2.448	50.636	63	1.0128	15.6728	0.06039	f	0.533333
55	supallosu	449638	4.43403e+06	1	4.52149	0	0	7.18737	0	0	0.997691	2005	deep	6	out	calcari	2.448	50.636	63	1.0128	15.6728	0.06039	g	0
56	supallosu	449638	4.43403e+06	1	4.52149	0	0	7.18737	0	0	0.997691	2005	deep	6	out	calcari	2.448	50.636	63	1.0128	15.6728	0.06039	tot	12.73
57	supallosu	449846	4.43387e+06	1	4.52149	0	0	7.18737	0	0	0.997691	2005	deep	5	out	calcari	2.448	50.636	63	1.0128	15.6728	0.0515759	a	1.87
58	supallosu	449846	4.43387e+06	1	4.52149	0	0	7.18737	0	0	0.997691	2005	deep	5	out	calcari	2.448	50.636	63	1.0128	15.6728	0.0515759	b	1.87
59	supallosu	449846	4.43387e+06	1	4.52149	0	0	7.18737	0	0	0.997691	2005	deep	5	out	calcari	2.448	50.636	63	1.0128	15.6728	0.0515759	c	2.07
60	supallosu	449846	4.43387e+06	1	4.52149	0	0	7.18737	0	0	0.997691	2005	deep	5	out	calcari	2.448	50.636	63	1.0128	15.6728	0.0515759	d	1.4
61	supallosu	449846	4.43387e+06	1	4.52149	0	0	7.18737	0	0	0.997691	2005	deep	5	out	calcari	2.448	50.636	63	1.0128	15.6728	0.0515759	e	3.2
62	supallosu	449846	4.43387e+06	1	4.52149	0	0	7.18737	0	0	0.997691	2005	deep	5	out	calcari	2.448	50.636	63	1.0128	15.6728	0.0515759	f	2.46667
63	supallosu	449846	4.43387e+06	1	4.52149	0	0	7.18737	0	0	0.997691	2005	deep	5	out	calcari	2.448	50.636	63	1.0128	15.6728	0.0515759	g	0.266667
64	supallosu	449846	4.43387e+06	1	4.52149	0	0	7.18737	0	0	0.997691	2005	deep	5	out	calcari	2.448	50.636	63	1.0128	15.6728	0.0515759	tot	8.6
65	supallosu	449725	4.4336e+06	1	4.52149	0	0	7.18737	0	0	0.997691	2005	deep	4	out	calcari	2.448	50.636	63	1.0128	15.6728	0.0446934	a	7.2
66	supallosu	449725	4.4336e+06	1	4.52149	0	0	7.18737	0	0	0.997691	2005	deep	4	out	calcari	2.448	50.636	63	1.0128	15.6728	0.0446934	b	6.47
67	supallosu	449725	4.4336e+06	1	4.52149	0	0	7.18737	0	0	0.997691	2005	deep	4	out	calcari	2.448	50.636	63	1.0128	15.6728	0.0446934	c	2.73
68	supallosu	449725	4.4336e+06	1	4.52149	0	0	7.18737	0	0	0.997691	2005	deep	4	out	calcari	2.448	50.636	63	1.0128	15.6728	0.0446934	d	1.86667
69	supallosu	449725	4.4336e+06	1	4.52149	0	0	7.18737	0	0	0.997691	2005	deep	4	out	calcari	2.448	50.636	63	1.0128	15.6728	0.0446934	e	2.06667
70	supallosu	449725	4.4336e+06	1	4.52149	0	0	7.18737	0	0	0.997691	2005	deep	4	out	calcari	2.448	50.636	63	1.0128	15.6728	0.0446934	f	1.66667
71	supallosu	449725	4.4336e+06	1	4.52149	0	0	7.18737	0	0	0.997691	2005	deep	4	out	calcari	2.448	50.636	63	1.0128	15.6728	0.0446934	g	0
72	supallosu	449725	4.4336e+06	1	4.52149	0	0	7.18737	0	0	0.997691	2005	deep	4	out	calcari	2.448	50.636	63	1.0128	15.6728	0.0446934	tot	18.47
73	supallosu	449773	4.43353e+06	1	4.52149	0	0	7.18737	0	0	0.997691	2005	deep	3	out	posiroccia	3.817	46.926	10	0.1608	11.5144	0.0388223	a	0
74	supallosu	449773	4.43353e+06	1	4.52149	0	0	7.18737	0	0	0.997691	2005	deep	3	out	posiroccia	3.817	46.926	10	0.1608	11.5144	0.0388223	b	0
75	supallosu	449773	4.43353e+06	1	4.52149	0	0	7.18737	0	0	0.997691	2005	deep	3	out	posiroccia	3.817	46.926	10	0.1608	11.5144	0.0388223	c	0.07
76	supallosu	449773	4.43353e+06	1	4.52149	0	0	7.18737	0	0	0.997691	2005	deep	3	out	posiroccia	3.817	46.926	10	0.1608	11.5144	0.0388223	d	0.2
77	supallosu	449773	4.43353e+06	1	4.52149	0	0	7.18737	0	0	0.997691	2005	deep	3	out	posiroccia	3.817	46.926	10	0.1608	11.5144	0.0388223	e	0.733333
78	supallosu	449773	4.43353e+06	1	4.52149	0	0	7.18737	0	0	0.997691	2005	deep	3	out	posiroccia	3.817	46.926	10	0.1608	11.5144	0.0388223	f	0.4
79	supallosu	449773	4.43353e+06	1	4.52149	0	0	7.18737	0	0	0.997691	2005	deep	3	out	posiroccia	3.817	46.926	10	0.1608	11.5144	0.0388223	g	0.0666667
80	supallosu	449773	4.43353e+06	1	4.52149	0	0	7.18737	0	0	0.997691	2005	deep	3	out	posiroccia	3.817	46.926	10	0.1608	11.5144	0.0388223	tot	0.77
81	supallosu	449882	4.4331e+06	1	4.52149	0	0	7.18737	0	0	0.997691	2005	deep	2	out	posiroccia	3.817	46.926	10	0.1608	11.5144	0.0258119	a	0
82	supallosu	449882	4.4331e+06	1	4.52149	0	0	7.18737	0	0	0.997691	2005	deep	2	out	posiroccia	3.817	46.926	10	0.1608	11.5144	0.0258119	b	0
83	supallosu	449882	4.4331e+06	1	4.52149	0	0	7.18737	0	0	0.997691	2005	deep	2	out	posiroccia	3.817	46.926	10	0.1608	11.5144	0.0258119	c	0.13
84	supallosu	449882	4.4331e+06	1	4.52149	0	0	7.18737	0	0	0.997691	2005	deep	2	out	posiroccia	3.817	46.926	10	0.1608	11.5144	0.0258119	d	0.266667
85	supallosu	449882	4.4331e+06	1	4.52149	0	0	7.18737	0	0	0.997691	2005	deep	2	out	posiroccia	3.817	46.926	10	0.1608	11.5144	0.0258119	e	1.06667
86	supallosu	449882	4.4331e+06	1	4.52149	0	0	7.18737	0	0	0.997691	2005	deep	2	out	posiroccia	3.817	46.926	10	0.1608	11.5144	0.0258119	f	1.33333
87	supallosu	449882	4.4331e+06	1	4.52149	0	0	7.18737	0	0	0.997691	2005	deep	2	out	posiroccia	3.817	46.926	10	0.1608	11.5144	0.0258119	g	0.0666667
88	supallosu	449882	4.4331e+06	1	4.52149	0	0	7.18737	0	0	0.997691	2005	deep	2	out	posiroccia	3.817	46.926	10	0.1608	11.5144	0.0258119	tot	1.5
89	supallosu	449993	4.4328e+06	1	4.52149	0	0	7.18737	0	0	0.997691	2005	deep	1	out	posiroccia	3.817	46.926	10	0.1608	11.5144	0.0305721	a	0.2
90	supallosu	449993	4.4328e+06	1	4.52149	0	0	7.18737	0	0	0.997691	2005	deep	1	out	posiroccia	3.817	46.926	10	0.1608	11.5144	0.0305721	b	0
91	supallosu	449993	4.4328e+06	1	4.52149	0	0	7.18737	0	0	0.997691	2005	deep	1	out	posiroccia	3.817	46.926	10	0.1608	11.5144	0.0305721	c	0
92	supallosu	449993	4.4328e+06	1	4.52149	0	0	7.18737	0	0	0.997691	2005	deep	1	out	posiroccia	3.817	46.926	10	0.1608	11.5144	0.0305721	d	0
93	supallosu	449993	4.4328e+06	1	4.52149	0	0	7.18737	0	0	0.997691	2005	deep	1	out	posiroccia	3.817	46.926	10	0.1608	11.5144	0.0305721	e	0.2
94	supallosu	449993	4.4328e+06	1	4.52149	0	0	7.18737	0	0	0.997691	2005	deep	1	out	posiroccia	3.817	46.926	10	0.1608	11.5144	0.0305721	f	0.2
95	supallosu	449993	4.4328e+06	1	4.52149	0	0	7.18737	0	0	0.997691	2005	deep	1	out	posiroccia	3.817	46.926	10	0.1608	11.5144	0.0305721	g	0
96	supallosu	449993	4.4328e+06	1	4.52149	0	0	7.18737	0	0	0.997691	2005	deep	1	out	posiroccia	3.817	46.926	10	0.1608	11.5144	0.0305721	tot	0.4
97	putzuidu	448699	4.43119e+06	1	4.52149	0	0	7.18737	0	0	0.997691	2005	deep	3	out	posiroccia	4.347	42.152	10	0.1608	11.5144	0.0425656	a	0
98	putzuidu	448699	4.43119e+06	1	4.52149	0	0	7.18737	0	0	0.997691	2005	deep	3	out	posiroccia	4.347	42.152	10	0.1608	11.5144	0.0425656	b	0.07
99	putzuidu	448699	4.43119e+06	1	4.52149	0	0	7.18737	0	0	0.997691	2005	deep	3	out	posiroccia	4.347	42.152	10	0.1608	11.5144	0.0425656	c	0.07
100	putzuidu	448699	4.43119e+06	1	4.52149	0	0	7.18737	0	0	0.997691	2005	deep	3	out	posiroccia	4.347	42.152	10	0.1608	11.5144	0.0425656	d	3.2
101	putzuidu	448699	4.43119e+06	1	4.52149	0	0	7.18737	0	0	0.997691	2005	deep	3	out	posiroccia	4.347	42.152	10	0.1608	11.5144	0.0425656	e	1.46667
102	putzuidu	448699	4.43119e+06	1	4.52149	0	0	7.18737	0	0	0.997691	2005	deep	3	out	posiroccia	4.347	42.152	10	0.1608	11.5144	0.0425656	f	0.6
103	putzuidu	448699	4.43119e+06	1	4.52149	0	0	7.18737	0	0	0.997691	2005	deep	3	out	posiroccia	4.347	42.152	10	0.1608	11.5144	0.0425656	g	0
104	putzuidu	448699	4.43119e+06	1	4.52149	0	0	7.18737	0	0	0.997691	2005	deep	3	out	posiroccia	4.347	42.152	10	0.1608	11.5144	0.0425656	tot	0.97
105	putzuidu	447567	4.4311e+06	1	4.52149	0	0	7.18737	0	0	0.997691	2005	deep	6	out	calcari	2.448	50.636	63	1.0128	15.6728	0.0577583	a	1.6
106	putzuidu	447567	4.4311e+06	1	4.52149	0	0	7.18737	0	0	0.997691	2005	deep	6	out	calcari	2.448	50.636	63	1.0128	15.6728	0.0577583	b	4
107	putzuidu	447567	4.4311e+06	1	4.52149	0	0	7.18737	0	0	0.997691	2005	deep	6	out	calcari	2.448	50.636	63	1.0128	15.6728	0.0577583	c	3.4
108	putzuidu	447567	4.4311e+06	1	4.52149	0	0	7.18737	0	0	0.997691	2005	deep	6	out	calcari	2.448	50.636	63	1.0128	15.6728	0.0577583	d	2.2
109	putzuidu	447567	4.4311e+06	1	4.52149	0	0	7.18737	0	0	0.997691	2005	deep	6	out	calcari	2.448	50.636	63	1.0128	15.6728	0.0577583	e	3.66667
110	putzuidu	447567	4.4311e+06	1	4.52149	0	0	7.18737	0	0	0.997691	2005	deep	6	out	calcari	2.448	50.636	63	1.0128	15.6728	0.0577583	f	3
111	putzuidu	447567	4.4311e+06	1	4.52149	0	0	7.18737	0	0	0.997691	2005	deep	6	out	calcari	2.448	50.636	63	1.0128	15.6728	0.0577583	g	0
112	putzuidu	447567	4.4311e+06	1	4.52149	0	0	7.18737	0	0	0.997691	2005	deep	6	out	calcari	2.448	50.636	63	1.0128	15.6728	0.0577583	tot	13.43
113	putzuidu	448282	4.43109e+06	1	4.52149	0	0	7.18737	0	0	0.997691	2005	deep	4	out	posiroccia	4.347	42.152	10	0.1608	11.5144	0.0646837	a	0.13
114	putzuidu	448282	4.43109e+06	1	4.52149	0	0	7.18737	0	0	0.997691	2005	deep	4	out	posiroccia	4.347	42.152	10	0.1608	11.5144	0.0646837	b	0.33
115	putzuidu	448282	4.43109e+06	1	4.52149	0	0	7.18737	0	0	0.997691	2005	deep	4	out	posiroccia	4.347	42.152	10	0.1608	11.5144	0.0646837	c	0.87
116	putzuidu	448282	4.43109e+06	1	4.52149	0	0	7.18737	0	0	0.997691	2005	deep	4	out	posiroccia	4.347	42.152	10	0.1608	11.5144	0.0646837	d	2.2
117	putzuidu	448282	4.43109e+06	1	4.52149	0	0	7.18737	0	0	0.997691	2005	deep	4	out	posiroccia	4.347	42.152	10	0.1608	11.5144	0.0646837	e	1.4
118	putzuidu	448282	4.43109e+06	1	4.52149	0	0	7.18737	0	0	0.997691	2005	deep	4	out	posiroccia	4.347	42.152	10	0.1608	11.5144	0.0646837	f	0.533333
119	putzuidu	448282	4.43109e+06	1	4.52149	0	0	7.18737	0	0	0.997691	2005	deep	4	out	posiroccia	4.347	42.152	10	0.1608	11.5144	0.0646837	g	0.133333
120	putzuidu	448282	4.43109e+06	1	4.52149	0	0	7.18737	0	0	0.997691	2005	deep	4	out	posiroccia	4.347	42.152	10	0.1608	11.5144	0.0646837	tot	5.17
121	putzuidu	449030	4.43108e+06	1	4.52149	0	0	7.18737	0	0	0.997691	2005	deep	2	out	posiroccia	4.347	42.152	10	0.1608	11.5144	0.0475012	a	0
122	putzuidu	449030	4.43108e+06	1	4.52149	0	0	7.18737	0	0	0.997691	2005	deep	2	out	posiroccia	4.347	42.152	10	0.1608	11.5144	0.0475012	b	0
123	putzuidu	449030	4.43108e+06	1	4.52149	0	0	7.18737	0	0	0.997691	2005	deep	2	out	posiroccia	4.347	42.152	10	0.1608	11.5144	0.0475012	c	0.6
124	putzuidu	449030	4.43108e+06	1	4.52149	0	0	7.18737	0	0	0.997691	2005	deep	2	out	posiroccia	4.347	42.152	10	0.1608	11.5144	0.0475012	d	0.266667
125	putzuidu	449030	4.43108e+06	1	4.52149	0	0	7.18737	0	0	0.997691	2005	deep	2	out	posiroccia	4.347	42.152	10	0.1608	11.5144	0.0475012	e	1.13333
126	putzuidu	449030	4.43108e+06	1	4.52149	0	0	7.18737	0	0	0.997691	2005	deep	2	out	posiroccia	4.347	42.152	10	0.1608	11.5144	0.0475012	f	0.266667
127	putzuidu	449030	4.43108e+06	1	4.52149	0	0	7.18737	0	0	0.997691	2005	deep	2	out	posiroccia	4.347	42.152	10	0.1608	11.5144	0.0475012	g	0
128	putzuidu	449030	4.43108e+06	1	4.52149	0	0	7.18737	0	0	0.997691	2005	deep	2	out	posiroccia	4.347	42.152	10	0.1608	11.5144	0.0475012	tot	4.5
129	putzuidu	448148	4.43107e+06	1	4.52149	0	0	7.18737	0	0	0.997691	2005	deep	5	out	calcari	2.448	50.636	63	1.0128	15.6728	0.0648607	a	4
130	putzuidu	448148	4.43107e+06	1	4.52149	0	0	7.18737	0	0	0.997691	2005	deep	5	out	calcari	2.448	50.636	63	1.0128	15.6728	0.0648607	b	9.6
131	putzuidu	448148	4.43107e+06	1	4.52149	0	0	7.18737	0	0	0.997691	2005	deep	5	out	calcari	2.448	50.636	63	1.0128	15.6728	0.0648607	c	5.27
132	putzuidu	448148	4.43107e+06	1	4.52149	0	0	7.18737	0	0	0.997691	2005	deep	5	out	calcari	2.448	50.636	63	1.0128	15.6728	0.0648607	d	2.13333
133	putzuidu	448148	4.43107e+06	1	4.52149	0	0	7.18737	0	0	0.997691	2005	deep	5	out	calcari	2.448	50.636	63	1.0128	15.6728	0.0648607	e	4
134	putzuidu	448148	4.43107e+06	1	4.52149	0	0	7.18737	0	0	0.997691	2005	deep	5	out	calcari	2.448	50.636	63	1.0128	15.6728	0.0648607	f	1.6
135	putzuidu	448148	4.43107e+06	1	4.52149	0	0	7.18737	0	0	0.997691	2005	deep	5	out	calcari	2.448	50.636	63	1.0128	15.6728	0.0648607	g	0.0666667
136	putzuidu	448148	4.43107e+06	1	4.52149	0	0	7.18737	0	0	0.997691	2005	deep	5	out	calcari	2.448	50.636	63	1.0128	15.6728	0.0648607	tot	21.5
137	putzuidu	449171	4.43056e+06	1	4.52149	0	0	7.18737	0	0	0.997691	2005	deep	1	out	calcari	1.013	25.38	63	1.0128	15.6728	0.0580896	a	1.33
138	putzuidu	449171	4.43056e+06	1	4.52149	0	0	7.18737	0	0	0.997691	2005	deep	1	out	calcari	1.013	25.38	63	1.0128	15.6728	0.0580896	b	3.53
139	putzuidu	449171	4.43056e+06	1	4.52149	0	0	7.18737	0	0	0.997691	2005	deep	1	out	calcari	1.013	25.38	63	1.0128	15.6728	0.0580896	c	3.8
140	putzuidu	449171	4.43056e+06	1	4.52149	0	0	7.18737	0	0	0.997691	2005	deep	1	out	calcari	1.013	25.38	63	1.0128	15.6728	0.0580896	d	2.4
141	putzuidu	449171	4.43056e+06	1	4.52149	0	0	7.18737	0	0	0.997691	2005	deep	1	out	calcari	1.013	25.38	63	1.0128	15.6728	0.0580896	e	3.8
142	putzuidu	449171	4.43056e+06	1	4.52149	0	0	7.18737	0	0	0.997691	2005	deep	1	out	calcari	1.013	25.38	63	1.0128	15.6728	0.0580896	f	1.46667
143	putzuidu	449171	4.43056e+06	1	4.52149	0	0	7.18737	0	0	0.997691	2005	deep	1	out	calcari	1.013	25.38	63	1.0128	15.6728	0.0580896	g	0
144	putzuidu	449171	4.43056e+06	1	4.52149	0	0	7.18737	0	0	0.997691	2005	deep	1	out	calcari	1.013	25.38	63	1.0128	15.6728	0.0580896	tot	10.8
145	sutingiosu	449197	4.42758e+06	1	4.52149	0	0	7.18737	0	0	0.997691	2005	deep	1	out	posiroccia	4.347	42.152	10	0.1608	11.5144	0.0586969	a	0.07
146	sutingiosu	449197	4.42758e+06	1	4.52149	0	0	7.18737	0	0	0.997691	2005	deep	1	out	posiroccia	4.347	42.152	10	0.1608	11.5144	0.0586969	b	0.07
147	sutingiosu	449197	4.42758e+06	1	4.52149	0	0	7.18737	0	0	0.997691	2005	deep	1	out	posiroccia	4.347	42.152	10	0.1608	11.5144	0.0586969	c	0.2
148	sutingiosu	449197	4.42758e+06	1	4.52149	0	0	7.18737	0	0	0.997691	2005	deep	1	out	posiroccia	4.347	42.152	10	0.1608	11.5144	0.0586969	d	3.66667
149	sutingiosu	449197	4.42758e+06	1	4.52149	0	0	7.18737	0	0	0.997691	2005	deep	1	out	posiroccia	4.347	42.152	10	0.1608	11.5144	0.0586969	e	3.6
150	sutingiosu	449197	4.42758e+06	1	4.52149	0	0	7.18737	0	0	0.997691	2005	deep	1	out	posiroccia	4.347	42.152	10	0.1608	11.5144	0.0586969	f	2.66667
151	sutingiosu	449197	4.42758e+06	1	4.52149	0	0	7.18737	0	0	0.997691	2005	deep	1	out	posiroccia	4.347	42.152	10	0.1608	11.5144	0.0586969	g	0.2
152	sutingiosu	449197	4.42758e+06	1	4.52149	0	0	7.18737	0	0	0.997691	2005	deep	1	out	posiroccia	4.347	42.152	10	0.1608	11.5144	0.0586969	tot	1.03
153	sutingiosu	449051	4.42722e+06	1	4.52149	0	0	7.18737	0	0	0.997691	2005	deep	2	out	calcari	1.078	19.153	63	1.0128	15.6728	0.0529191	a	6.27
154	sutingiosu	449051	4.42722e+06	1	4.52149	0	0	7.18737	0	0	0.997691	2005	deep	2	out	calcari	1.078	19.153	63	1.0128	15.6728	0.0529191	b	6.4
155	sutingiosu	449051	4.42722e+06	1	4.52149	0	0	7.18737	0	0	0.997691	2005	deep	2	out	calcari	1.078	19.153	63	1.0128	15.6728	0.0529191	c	2.27
156	sutingiosu	449051	4.42722e+06	1	4.52149	0	0	7.18737	0	0	0.997691	2005	deep	2	out	calcari	1.078	19.153	63	1.0128	15.6728	0.0529191	d	1.8
157	sutingiosu	449051	4.42722e+06	1	4.52149	0	0	7.18737	0	0	0.997691	2005	deep	2	out	calcari	1.078	19.153	63	1.0128	15.6728	0.0529191	e	2
158	sutingiosu	449051	4.42722e+06	1	4.52149	0	0	7.18737	0	0	0.997691	2005	deep	2	out	calcari	1.078	19.153	63	1.0128	15.6728	0.0529191	f	0.866667
159	sutingiosu	449051	4.42722e+06	1	4.52149	0	0	7.18737	0	0	0.997691	2005	deep	2	out	calcari	1.078	19.153	63	1.0128	15.6728	0.0529191	g	0
160	sutingiosu	449051	4.42722e+06	1	4.52149	0	0	7.18737	0	0	0.997691	2005	deep	2	out	calcari	1.078	19.153	63	1.0128	15.6728	0.0529191	tot	16.4
161	sutingiosu	448833	4.42675e+06	1	4.52149	0	0	7.18737	0	0	0.997691	2005	deep	3	out	posiroccia	4.347	42.152	10	0.1608	11.5144	0.0475815	a	0
162	sutingiosu	448833	4.42675e+06	1	4.52149	0	0	7.18737	0	0	0.997691	2005	deep	3	out	posiroccia	4.347	42.152	10	0.1608	11.5144	0.0475815	b	0.07
163	sutingiosu	448833	4.42675e+06	1	4.52149	0	0	7.18737	0	0	0.997691	2005	deep	3	out	posiroccia	4.347	42.152	10	0.1608	11.5144	0.0475815	c	0.73
164	sutingiosu	448833	4.42675e+06	1	4.52149	0	0	7.18737	0	0	0.997691	2005	deep	3	out	posiroccia	4.347	42.152	10	0.1608	11.5144	0.0475815	d	1.46667
165	sutingiosu	448833	4.42675e+06	1	4.52149	0	0	7.18737	0	0	0.997691	2005	deep	3	out	posiroccia	4.347	42.152	10	0.1608	11.5144	0.0475815	e	0.733333
166	sutingiosu	448833	4.42675e+06	1	4.52149	0	0	7.18737	0	0	0.997691	2005	deep	3	out	posiroccia	4.347	42.152	10	0.1608	11.5144	0.0475815	f	0.6
167	sutingiosu	448833	4.42675e+06	1	4.52149	0	0	7.18737	0	0	0.997691	2005	deep	3	out	posiroccia	4.347	42.152	10	0.1608	11.5144	0.0475815	g	0.133333
168	sutingiosu	448833	4.42675e+06	1	4.52149	0	0	7.18737	0	0	0.997691	2005	deep	3	out	posiroccia	4.347	42.152	10	0.1608	11.5144	0.0475815	tot	1.93
169	sutingiosu	448573	4.42641e+06	1	4.52149	0	0	7.18737	0	0	0.997691	2005	deep	4	out	calcari	1.078	19.153	63	1.0128	15.6728	0.0603563	a	1.93
170	sutingiosu	448573	4.42641e+06	1	4.52149	0	0	7.18737	0	0	0.997691	2005	deep	4	out	calcari	1.078	19.153	63	1.0128	15.6728	0.0603563	b	1.67
171	sutingiosu	448573	4.42641e+06	1	4.52149	0	0	7.18737	0	0	0.997691	2005	deep	4	out	calcari	1.078	19.153	63	1.0128	15.6728	0.0603563	c	1.8
172	sutingiosu	448573	4.42641e+06	1	4.52149	0	0	7.18737	0	0	0.997691	2005	deep	4	out	calcari	1.078	19.153	63	1.0128	15.6728	0.0603563	d	1.66667
173	sutingiosu	448573	4.42641e+06	1	4.52149	0	0	7.18737	0	0	0.997691	2005	deep	4	out	calcari	1.078	19.153	63	1.0128	15.6728	0.0603563	e	2.6
174	sutingiosu	448573	4.42641e+06	1	4.52149	0	0	7.18737	0	0	0.997691	2005	deep	4	out	calcari	1.078	19.153	63	1.0128	15.6728	0.0603563	f	2.06667
175	sutingiosu	448573	4.42641e+06	1	4.52149	0	0	7.18737	0	0	0.997691	2005	deep	4	out	calcari	1.078	19.153	63	1.0128	15.6728	0.0603563	g	0.0666667
176	sutingiosu	448573	4.42641e+06	1	4.52149	0	0	7.18737	0	0	0.997691	2005	deep	4	out	calcari	1.078	19.153	63	1.0128	15.6728	0.0603563	tot	7.73
177	sutingiosu	448174	4.42612e+06	1	4.52149	0	0	7.18737	0	0	0.997691	2005	deep	6	out	posiroccia	4.347	42.152	10	0.1608	11.5144	0.0562878	a	0
178	sutingiosu	448174	4.42612e+06	1	4.52149	0	0	7.18737	0	0	0.997691	2005	deep	6	out	posiroccia	4.347	42.152	10	0.1608	11.5144	0.0562878	b	0
179	sutingiosu	448174	4.42612e+06	1	4.52149	0	0	7.18737	0	0	0.997691	2005	deep	6	out	posiroccia	4.347	42.152	10	0.1608	11.5144	0.0562878	c	0.27
180	sutingiosu	448174	4.42612e+06	1	4.52149	0	0	7.18737	0	0	0.997691	2005	deep	6	out	posiroccia	4.347	42.152	10	0.1608	11.5144	0.0562878	d	0.933333
181	sutingiosu	448174	4.42612e+06	1	4.52149	0	0	7.18737	0	0	0.997691	2005	deep	6	out	posiroccia	4.347	42.152	10	0.1608	11.5144	0.0562878	e	1
182	sutingiosu	448174	4.42612e+06	1	4.52149	0	0	7.18737	0	0	0.997691	2005	deep	6	out	posiroccia	4.347	42.152	10	0.1608	11.5144	0.0562878	f	0.266667
183	sutingiosu	448174	4.42612e+06	1	4.52149	0	0	7.18737	0	0	0.997691	2005	deep	6	out	posiroccia	4.347	42.152	10	0.1608	11.5144	0.0562878	g	0.0666667
184	sutingiosu	448174	4.42612e+06	1	4.52149	0	0	7.18737	0	0	0.997691	2005	deep	6	out	posiroccia	4.347	42.152	10	0.1608	11.5144	0.0562878	tot	3.47
185	sutingiosu	448248	4.42611e+06	1	4.52149	0	0	7.18737	0	0	0.997691	2005	deep	5	out	calcari	1.078	19.153	63	1.0128	15.6728	0.0549363	a	5.6
186	sutingiosu	448248	4.42611e+06	1	4.52149	0	0	7.18737	0	0	0.997691	2005	deep	5	out	calcari	1.078	19.153	63	1.0128	15.6728	0.0549363	b	5.4
187	sutingiosu	448248	4.42611e+06	1	4.52149	0	0	7.18737	0	0	0.997691	2005	deep	5	out	calcari	1.078	19.153	63	1.0128	15.6728	0.0549363	c	3.93
188	sutingiosu	448248	4.42611e+06	1	4.52149	0	0	7.18737	0	0	0.997691	2005	deep	5	out	calcari	1.078	19.153	63	1.0128	15.6728	0.0549363	d	0.533333
189	sutingiosu	448248	4.42611e+06	1	4.52149	0	0	7.18737	0	0	0.997691	2005	deep	5	out	calcari	1.078	19.153	63	1.0128	15.6728	0.0549363	e	0.6
190	sutingiosu	448248	4.42611e+06	1	4.52149	0	0	7.18737	0	0	0.997691	2005	deep	5	out	calcari	1.078	19.153	63	1.0128	15.6728	0.0549363	f	0.266667
191	sutingiosu	448248	4.42611e+06	1	4.52149	0	0	7.18737	0	0	0.997691	2005	deep	5	out	calcari	1.078	19.153	63	1.0128	15.6728	0.0549363	g	0
192	sutingiosu	448248	4.42611e+06	1	4.52149	0	0	7.18737	0	0	0.997691	2005	deep	5	out	calcari	1.078	19.153	63	1.0128	15.6728	0.0549363	tot	20
193	portosuedda	447995	4.42483e+06	2	2.5482	0	0	2.28423	0	0	0.260907	2004	shallow	3	c	calcari	2.548	38.775	8	0.624	8.2977	0.117087	a	0.13
194	portosuedda	447995	4.42483e+06	2	2.5482	0	0	2.28423	0	0	0.260907	2004	shallow	3	c	calcari	2.548	38.775	8	0.624	8.2977	0.117087	b	0.27
195	portosuedda	447995	4.42483e+06	2	2.5482	0	0	2.28423	0	0	0.260907	2004	shallow	3	c	calcari	2.548	38.775	8	0.624	8.2977	0.117087	c	1
196	portosuedda	447995	4.42483e+06	2	2.5482	0	0	2.28423	0	0	0.260907	2004	shallow	3	c	calcari	2.548	38.775	8	0.624	8.2977	0.117087	d	2.13333
197	portosuedda	447995	4.42483e+06	2	2.5482	0	0	2.28423	0	0	0.260907	2004	shallow	3	c	calcari	2.548	38.775	8	0.624	8.2977	0.117087	e	4.8
198	portosuedda	447995	4.42483e+06	2	2.5482	0	0	2.28423	0	0	0.260907	2004	shallow	3	c	calcari	2.548	38.775	8	0.624	8.2977	0.117087	f	4
199	portosuedda	447995	4.42483e+06	2	2.5482	0	0	2.28423	0	0	0.260907	2004	shallow	3	c	calcari	2.548	38.775	8	0.624	8.2977	0.117087	g	0.333333
200	portosuedda	447995	4.42483e+06	2	2.5482	0	0	2.28423	0	0	0.260907	2004	shallow	3	c	calcari	2.548	38.775	8	0.624	8.2977	0.117087	tot	7.03
201	portosuedda	447995	4.42483e+06	2	2.5482	0	0	2.28423	0	0	0.260907	2007	deep	1	c	calcari	2.548	38.775	8	0.624	8.2977	0.113821	a	0.044444
202	portosuedda	447995	4.42483e+06	2	2.5482	0	0	2.28423	0	0	0.260907	2007	deep	1	c	calcari	2.548	38.775	8	0.624	8.2977	0.113821	b	0.8
203	portosuedda	447995	4.42483e+06	2	2.5482	0	0	2.28423	0	0	0.260907	2007	deep	1	c	calcari	2.548	38.775	8	0.624	8.2977	0.113821	c	1.2
204	portosuedda	447995	4.42483e+06	2	2.5482	0	0	2.28423	0	0	0.260907	2007	deep	1	c	calcari	2.548	38.775	8	0.624	8.2977	0.113821	d	0.633333
205	portosuedda	447995	4.42483e+06	2	2.5482	0	0	2.28423	0	0	0.260907	2007	deep	1	c	calcari	2.548	38.775	8	0.624	8.2977	0.113821	e	2.35556
206	portosuedda	447995	4.42483e+06	2	2.5482	0	0	2.28423	0	0	0.260907	2007	deep	1	c	calcari	2.548	38.775	8	0.624	8.2977	0.113821	f	1.42222
207	portosuedda	447995	4.42483e+06	2	2.5482	0	0	2.28423	0	0	0.260907	2007	deep	1	c	calcari	2.548	38.775	8	0.624	8.2977	0.113821	g	0.2
208	portosuedda	447995	4.42483e+06	2	2.5482	0	0	2.28423	0	0	0.260907	2007	deep	1	c	calcari	2.548	38.775	8	0.624	8.2977	0.113821	tot	5.12
209	portosuedda	448198	4.42479e+06	2	2.5482	0	0	2.28423	0	0	0.260907	2007	shallow	2	c	posiroccia	2.284	30.126	1	0.078	6.08	0.102835	a	0.022222
210	portosuedda	448198	4.42479e+06	2	2.5482	0	0	2.28423	0	0	0.260907	2007	shallow	2	c	posiroccia	2.284	30.126	1	0.078	6.08	0.102835	b	0.066667
211	portosuedda	448198	4.42479e+06	2	2.5482	0	0	2.28423	0	0	0.260907	2007	shallow	2	c	posiroccia	2.284	30.126	1	0.078	6.08	0.102835	c	0.244444
212	portosuedda	448198	4.42479e+06	2	2.5482	0	0	2.28423	0	0	0.260907	2007	shallow	2	c	posiroccia	2.284	30.126	1	0.078	6.08	0.102835	d	1.55556
213	portosuedda	448198	4.42479e+06	2	2.5482	0	0	2.28423	0	0	0.260907	2007	shallow	2	c	posiroccia	2.284	30.126	1	0.078	6.08	0.102835	e	1.97778
214	portosuedda	448198	4.42479e+06	2	2.5482	0	0	2.28423	0	0	0.260907	2007	shallow	2	c	posiroccia	2.284	30.126	1	0.078	6.08	0.102835	f	0.266667
215	portosuedda	448198	4.42479e+06	2	2.5482	0	0	2.28423	0	0	0.260907	2007	shallow	2	c	posiroccia	2.284	30.126	1	0.078	6.08	0.102835	g	0
216	portosuedda	448198	4.42479e+06	2	2.5482	0	0	2.28423	0	0	0.260907	2007	shallow	2	c	posiroccia	2.284	30.126	1	0.078	6.08	0.102835	tot	2.23
217	portosuedda	448454	4.42432e+06	2	2.5482	0	0	2.28423	0	0	0.260907	2005	deep	1	c	calcari	2.548	38.775	8	0.624	8.2977	0.0982316	a	1
218	portosuedda	448454	4.42432e+06	2	2.5482	0	0	2.28423	0	0	0.260907	2005	deep	1	c	calcari	2.548	38.775	8	0.624	8.2977	0.0982316	b	1.4
219	portosuedda	448454	4.42432e+06	2	2.5482	0	0	2.28423	0	0	0.260907	2005	deep	1	c	calcari	2.548	38.775	8	0.624	8.2977	0.0982316	c	1.67
220	portosuedda	448454	4.42432e+06	2	2.5482	0	0	2.28423	0	0	0.260907	2005	deep	1	c	calcari	2.548	38.775	8	0.624	8.2977	0.0982316	d	1.26667
221	portosuedda	448454	4.42432e+06	2	2.5482	0	0	2.28423	0	0	0.260907	2005	deep	1	c	calcari	2.548	38.775	8	0.624	8.2977	0.0982316	e	1.4
222	portosuedda	448454	4.42432e+06	2	2.5482	0	0	2.28423	0	0	0.260907	2005	deep	1	c	calcari	2.548	38.775	8	0.624	8.2977	0.0982316	f	1
223	portosuedda	448454	4.42432e+06	2	2.5482	0	0	2.28423	0	0	0.260907	2005	deep	1	c	calcari	2.548	38.775	8	0.624	8.2977	0.0982316	g	0.133333
224	portosuedda	448454	4.42432e+06	2	2.5482	0	0	2.28423	0	0	0.260907	2005	deep	1	c	calcari	2.548	38.775	8	0.624	8.2977	0.0982316	tot	5.97
225	portosuedda	448473	4.42428e+06	2	2.5482	0	0	2.28423	0	0	0.260907	2005	deep	2	c	posiroccia	2.284	30.126	1	0.078	6.08	0.089895	a	0
226	portosuedda	448473	4.42428e+06	2	2.5482	0	0	2.28423	0	0	0.260907	2005	deep	2	c	posiroccia	2.284	30.126	1	0.078	6.08	0.089895	b	0.2
227	portosuedda	448473	4.42428e+06	2	2.5482	0	0	2.28423	0	0	0.260907	2005	deep	2	c	posiroccia	2.284	30.126	1	0.078	6.08	0.089895	c	0.8
228	portosuedda	448473	4.42428e+06	2	2.5482	0	0	2.28423	0	0	0.260907	2005	deep	2	c	posiroccia	2.284	30.126	1	0.078	6.08	0.089895	d	2.1
229	portosuedda	448473	4.42428e+06	2	2.5482	0	0	2.28423	0	0	0.260907	2005	deep	2	c	posiroccia	2.284	30.126	1	0.078	6.08	0.089895	e	3.46667
230	portosuedda	448473	4.42428e+06	2	2.5482	0	0	2.28423	0	0	0.260907	2005	deep	2	c	posiroccia	2.284	30.126	1	0.078	6.08	0.089895	f	2.4
231	portosuedda	448473	4.42428e+06	2	2.5482	0	0	2.28423	0	0	0.260907	2005	deep	2	c	posiroccia	2.284	30.126	1	0.078	6.08	0.089895	g	0.333333
232	portosuedda	448473	4.42428e+06	2	2.5482	0	0	2.28423	0	0	0.260907	2005	deep	2	c	posiroccia	2.284	30.126	1	0.078	6.08	0.089895	tot	5.13
233	portosuedda	448463	4.424e+06	2	2.5482	0	0	2.28423	0	0	0.260907	2005	deep	3	c	calcari	2.548	38.775	8	0.624	8.2977	0.0725758	a	0.53
234	portosuedda	448463	4.424e+06	2	2.5482	0	0	2.28423	0	0	0.260907	2005	deep	3	c	calcari	2.548	38.775	8	0.624	8.2977	0.0725758	b	1.2
235	portosuedda	448463	4.424e+06	2	2.5482	0	0	2.28423	0	0	0.260907	2005	deep	3	c	calcari	2.548	38.775	8	0.624	8.2977	0.0725758	c	1.8
236	portosuedda	448463	4.424e+06	2	2.5482	0	0	2.28423	0	0	0.260907	2005	deep	3	c	calcari	2.548	38.775	8	0.624	8.2977	0.0725758	d	1.53333
237	portosuedda	448463	4.424e+06	2	2.5482	0	0	2.28423	0	0	0.260907	2005	deep	3	c	calcari	2.548	38.775	8	0.624	8.2977	0.0725758	e	1.26667
238	portosuedda	448463	4.424e+06	2	2.5482	0	0	2.28423	0	0	0.260907	2005	deep	3	c	calcari	2.548	38.775	8	0.624	8.2977	0.0725758	f	0.933333
239	portosuedda	448463	4.424e+06	2	2.5482	0	0	2.28423	0	0	0.260907	2005	deep	3	c	calcari	2.548	38.775	8	0.624	8.2977	0.0725758	g	0.333333
240	portosuedda	448463	4.424e+06	2	2.5482	0	0	2.28423	0	0	0.260907	2005	deep	3	c	calcari	2.548	38.775	8	0.624	8.2977	0.0725758	tot	5.57
241	portosuedda	448554	4.4231e+06	2	2.5482	0	0	2.28423	0	0	0.260907	2005	deep	4	c	posiroccia	2.284	30.126	1	0.078	6.08	0.0710154	a	0
242	portosuedda	448554	4.4231e+06	2	2.5482	0	0	2.28423	0	0	0.260907	2005	deep	4	c	posiroccia	2.284	30.126	1	0.078	6.08	0.0710154	b	0.07
243	portosuedda	448554	4.4231e+06	2	2.5482	0	0	2.28423	0	0	0.260907	2005	deep	4	c	posiroccia	2.284	30.126	1	0.078	6.08	0.0710154	c	0.6
244	portosuedda	448554	4.4231e+06	2	2.5482	0	0	2.28423	0	0	0.260907	2005	deep	4	c	posiroccia	2.284	30.126	1	0.078	6.08	0.0710154	d	1.33333
245	portosuedda	448554	4.4231e+06	2	2.5482	0	0	2.28423	0	0	0.260907	2005	deep	4	c	posiroccia	2.284	30.126	1	0.078	6.08	0.0710154	e	1.86667
246	portosuedda	448554	4.4231e+06	2	2.5482	0	0	2.28423	0	0	0.260907	2005	deep	4	c	posiroccia	2.284	30.126	1	0.078	6.08	0.0710154	f	1.93333
247	portosuedda	448554	4.4231e+06	2	2.5482	0	0	2.28423	0	0	0.260907	2005	deep	4	c	posiroccia	2.284	30.126	1	0.078	6.08	0.0710154	g	0.2
248	portosuedda	448554	4.4231e+06	2	2.5482	0	0	2.28423	0	0	0.260907	2005	deep	4	c	posiroccia	2.284	30.126	1	0.078	6.08	0.0710154	tot	3.33
249	portosuedda	448564	4.42211e+06	2	2.5482	0	0	2.28423	0	0	0.260907	2005	deep	5	c	posiroccia	2.284	30.126	1	0.078	6.08	0.0823704	a	0
250	portosuedda	448564	4.42211e+06	2	2.5482	0	0	2.28423	0	0	0.260907	2005	deep	5	c	posiroccia	2.284	30.126	1	0.078	6.08	0.0823704	b	0
251	portosuedda	448564	4.42211e+06	2	2.5482	0	0	2.28423	0	0	0.260907	2005	deep	5	c	posiroccia	2.284	30.126	1	0.078	6.08	0.0823704	c	0.13
252	portosuedda	448564	4.42211e+06	2	2.5482	0	0	2.28423	0	0	0.260907	2005	deep	5	c	posiroccia	2.284	30.126	1	0.078	6.08	0.0823704	d	1
253	portosuedda	448564	4.42211e+06	2	2.5482	0	0	2.28423	0	0	0.260907	2005	deep	5	c	posiroccia	2.284	30.126	1	0.078	6.08	0.0823704	e	1.53333
254	portosuedda	448564	4.42211e+06	2	2.5482	0	0	2.28423	0	0	0.260907	2005	deep	5	c	posiroccia	2.284	30.126	1	0.078	6.08	0.0823704	f	0.933333
255	portosuedda	448564	4.42211e+06	2	2.5482	0	0	2.28423	0	0	0.260907	2005	deep	5	c	posiroccia	2.284	30.126	1	0.078	6.08	0.0823704	g	0.2
256	portosuedda	448564	4.42211e+06	2	2.5482	0	0	2.28423	0	0	0.260907	2005	deep	5	c	posiroccia	2.284	30.126	1	0.078	6.08	0.0823704	tot	1.97
257	portosuedda	448561	4.42206e+06	2	2.5482	0	0	2.28423	0	0	0.260907	2005	deep	6	c	calcari	2.548	38.775	8	0.624	8.2977	0.0801504	a	0.93
258	portosuedda	448561	4.42206e+06	2	2.5482	0	0	2.28423	0	0	0.260907	2005	deep	6	c	calcari	2.548	38.775	8	0.624	8.2977	0.0801504	b	0.93
259	portosuedda	448561	4.42206e+06	2	2.5482	0	0	2.28423	0	0	0.260907	2005	deep	6	c	calcari	2.548	38.775	8	0.624	8.2977	0.0801504	c	0.73
260	portosuedda	448561	4.42206e+06	2	2.5482	0	0	2.28423	0	0	0.260907	2005	deep	6	c	calcari	2.548	38.775	8	0.624	8.2977	0.0801504	d	1.2
261	portosuedda	448561	4.42206e+06	2	2.5482	0	0	2.28423	0	0	0.260907	2005	deep	6	c	calcari	2.548	38.775	8	0.624	8.2977	0.0801504	e	1.13333
262	portosuedda	448561	4.42206e+06	2	2.5482	0	0	2.28423	0	0	0.260907	2005	deep	6	c	calcari	2.548	38.775	8	0.624	8.2977	0.0801504	f	2.13333
263	portosuedda	448561	4.42206e+06	2	2.5482	0	0	2.28423	0	0	0.260907	2005	deep	6	c	calcari	2.548	38.775	8	0.624	8.2977	0.0801504	g	0.2
264	portosuedda	448561	4.42206e+06	2	2.5482	0	0	2.28423	0	0	0.260907	2005	deep	6	c	calcari	2.548	38.775	8	0.624	8.2977	0.0801504	tot	4.93
265	portosuedda	448674	4.4222e+06	2	2.5482	0	0	2.28423	0	0	0.260907	2004	deep	1	c	calcari	2.548	38.775	8	0.624	8.2977	0.0778346	a	0.13
266	portosuedda	448674	4.4222e+06	2	2.5482	0	0	2.28423	0	0	0.260907	2004	deep	1	c	calcari	2.548	38.775	8	0.624	8.2977	0.0778346	b	0.67
267	portosuedda	448674	4.4222e+06	2	2.5482	0	0	2.28423	0	0	0.260907	2004	deep	1	c	calcari	2.548	38.775	8	0.624	8.2977	0.0778346	c	1.73
268	portosuedda	448674	4.4222e+06	2	2.5482	0	0	2.28423	0	0	0.260907	2004	deep	1	c	calcari	2.548	38.775	8	0.624	8.2977	0.0778346	d	2.2
269	portosuedda	448674	4.4222e+06	2	2.5482	0	0	2.28423	0	0	0.260907	2004	deep	1	c	calcari	2.548	38.775	8	0.624	8.2977	0.0778346	e	2.66667
270	portosuedda	448674	4.4222e+06	2	2.5482	0	0	2.28423	0	0	0.260907	2004	deep	1	c	calcari	2.548	38.775	8	0.624	8.2977	0.0778346	f	2
271	portosuedda	448674	4.4222e+06	2	2.5482	0	0	2.28423	0	0	0.260907	2004	deep	1	c	calcari	2.548	38.775	8	0.624	8.2977	0.0778346	g	0.4
272	portosuedda	448674	4.4222e+06	2	2.5482	0	0	2.28423	0	0	0.260907	2004	deep	1	c	calcari	2.548	38.775	8	0.624	8.2977	0.0778346	tot	6.17
273	sabenda	448677	4.42055e+06	2	2.5482	0	0	2.28423	0	0	0.260907	2004	shallow	1	b	calcari	2.548	38.775	8	0.624	8.2977	0.0838671	a	0.0666667
274	sabenda	448677	4.42055e+06	2	2.5482	0	0	2.28423	0	0	0.260907	2004	shallow	1	b	calcari	2.548	38.775	8	0.624	8.2977	0.0838671	b	1.26667
275	sabenda	448677	4.42055e+06	2	2.5482	0	0	2.28423	0	0	0.260907	2004	shallow	1	b	calcari	2.548	38.775	8	0.624	8.2977	0.0838671	c	1.53333
276	sabenda	448677	4.42055e+06	2	2.5482	0	0	2.28423	0	0	0.260907	2004	shallow	1	b	calcari	2.548	38.775	8	0.624	8.2977	0.0838671	d	1.2
277	sabenda	448677	4.42055e+06	2	2.5482	0	0	2.28423	0	0	0.260907	2004	shallow	1	b	calcari	2.548	38.775	8	0.624	8.2977	0.0838671	e	1.73333
278	sabenda	448677	4.42055e+06	2	2.5482	0	0	2.28423	0	0	0.260907	2004	shallow	1	b	calcari	2.548	38.775	8	0.624	8.2977	0.0838671	f	1.66667
279	sabenda	448677	4.42055e+06	2	2.5482	0	0	2.28423	0	0	0.260907	2004	shallow	1	b	calcari	2.548	38.775	8	0.624	8.2977	0.0838671	g	0.2
280	sabenda	448677	4.42055e+06	2	2.5482	0	0	2.28423	0	0	0.260907	2004	shallow	1	b	calcari	2.548	38.775	8	0.624	8.2977	0.0838671	tot	5.27
281	sabenda	448770	4.42057e+06	2	2.5482	0	0	2.28423	0	0	0.260907	2007	shallow	2	c	calcari	2.548	38.775	8	0.624	8.2977	0.0711006	a	0.288889
282	sabenda	448770	4.42057e+06	2	2.5482	0	0	2.28423	0	0	0.260907	2007	shallow	2	c	calcari	2.548	38.775	8	0.624	8.2977	0.0711006	b	2
283	sabenda	448770	4.42057e+06	2	2.5482	0	0	2.28423	0	0	0.260907	2007	shallow	2	c	calcari	2.548	38.775	8	0.624	8.2977	0.0711006	c	4.465
284	sabenda	448770	4.42057e+06	2	2.5482	0	0	2.28423	0	0	0.260907	2007	shallow	2	c	calcari	2.548	38.775	8	0.624	8.2977	0.0711006	d	1.86667
285	sabenda	448770	4.42057e+06	2	2.5482	0	0	2.28423	0	0	0.260907	2007	shallow	2	c	calcari	2.548	38.775	8	0.624	8.2977	0.0711006	e	1.46667
286	sabenda	448770	4.42057e+06	2	2.5482	0	0	2.28423	0	0	0.260907	2007	shallow	2	c	calcari	2.548	38.775	8	0.624	8.2977	0.0711006	f	0.966667
287	sabenda	448770	4.42057e+06	2	2.5482	0	0	2.28423	0	0	0.260907	2007	shallow	2	c	calcari	2.548	38.775	8	0.624	8.2977	0.0711006	g	0.177778
288	sabenda	448770	4.42057e+06	2	2.5482	0	0	2.28423	0	0	0.260907	2007	shallow	2	c	calcari	2.548	38.775	8	0.624	8.2977	0.0711006	tot	6.68
289	maimoni	448410	4.4189e+06	2	2.5482	0	0	2.28423	0	0	0.260907	2003	shallow	1	b	posiroccia	2.284	30.126	1	0.078	6.08	0.0870694	a	0
290	maimoni	448410	4.4189e+06	2	2.5482	0	0	2.28423	0	0	0.260907	2003	shallow	1	b	posiroccia	2.284	30.126	1	0.078	6.08	0.0870694	b	0.25
291	maimoni	448410	4.4189e+06	2	2.5482	0	0	2.28423	0	0	0.260907	2003	shallow	1	b	posiroccia	2.284	30.126	1	0.078	6.08	0.0870694	c	1.25
292	maimoni	448410	4.4189e+06	2	2.5482	0	0	2.28423	0	0	0.260907	2003	shallow	1	b	posiroccia	2.284	30.126	1	0.078	6.08	0.0870694	d	1.95
293	maimoni	448410	4.4189e+06	2	2.5482	0	0	2.28423	0	0	0.260907	2003	shallow	1	b	posiroccia	2.284	30.126	1	0.078	6.08	0.0870694	e	2.8
294	maimoni	448410	4.4189e+06	2	2.5482	0	0	2.28423	0	0	0.260907	2003	shallow	1	b	posiroccia	2.284	30.126	1	0.078	6.08	0.0870694	f	1.55
295	maimoni	448410	4.4189e+06	2	2.5482	0	0	2.28423	0	0	0.260907	2003	shallow	1	b	posiroccia	2.284	30.126	1	0.078	6.08	0.0870694	g	0.75
296	maimoni	448410	4.4189e+06	2	2.5482	0	0	2.28423	0	0	0.260907	2003	shallow	1	b	posiroccia	2.284	30.126	1	0.078	6.08	0.0870694	tot	5.03
297	maimoni	448510	4.4189e+06	2	2.5482	0	0	2.28423	0	0	0.260907	2004	deep	1	b	posiroccia	2.284	30.126	1	0.078	6.08	0.0842268	a	0
298	maimoni	448510	4.4189e+06	2	2.5482	0	0	2.28423	0	0	0.260907	2004	deep	1	b	posiroccia	2.284	30.126	1	0.078	6.08	0.0842268	b	0.67
299	maimoni	448510	4.4189e+06	2	2.5482	0	0	2.28423	0	0	0.260907	2004	deep	1	b	posiroccia	2.284	30.126	1	0.078	6.08	0.0842268	c	4
300	maimoni	448510	4.4189e+06	2	2.5482	0	0	2.28423	0	0	0.260907	2004	deep	1	b	posiroccia	2.284	30.126	1	0.078	6.08	0.0842268	d	4.53333
301	maimoni	448510	4.4189e+06	2	2.5482	0	0	2.28423	0	0	0.260907	2004	deep	1	b	posiroccia	2.284	30.126	1	0.078	6.08	0.0842268	e	1.93333
302	maimoni	448510	4.4189e+06	2	2.5482	0	0	2.28423	0	0	0.260907	2004	deep	1	b	posiroccia	2.284	30.126	1	0.078	6.08	0.0842268	f	1.8
303	maimoni	448510	4.4189e+06	2	2.5482	0	0	2.28423	0	0	0.260907	2004	deep	1	b	posiroccia	2.284	30.126	1	0.078	6.08	0.0842268	g	0.466667
304	maimoni	448510	4.4189e+06	2	2.5482	0	0	2.28423	0	0	0.260907	2004	deep	1	b	posiroccia	2.284	30.126	1	0.078	6.08	0.0842268	tot	9.03
305	seu	447687	4.41739e+06	2	2.5482	0	0	2.28423	0	0	0.260907	2003	deep	1	c	calcari	2.548	38.775	8	0.624	8.2977	0.0829522	a	0.2
306	seu	447687	4.41739e+06	2	2.5482	0	0	2.28423	0	0	0.260907	2003	deep	1	c	calcari	2.548	38.775	8	0.624	8.2977	0.0829522	b	0.95
307	seu	447687	4.41739e+06	2	2.5482	0	0	2.28423	0	0	0.260907	2003	deep	1	c	calcari	2.548	38.775	8	0.624	8.2977	0.0829522	c	2.65
308	seu	447687	4.41739e+06	2	2.5482	0	0	2.28423	0	0	0.260907	2003	deep	1	c	calcari	2.548	38.775	8	0.624	8.2977	0.0829522	d	1.9
309	seu	447687	4.41739e+06	2	2.5482	0	0	2.28423	0	0	0.260907	2003	deep	1	c	calcari	2.548	38.775	8	0.624	8.2977	0.0829522	e	4.5
310	seu	447687	4.41739e+06	2	2.5482	0	0	2.28423	0	0	0.260907	2003	deep	1	c	calcari	2.548	38.775	8	0.624	8.2977	0.0829522	f	3.55
311	seu	447687	4.41739e+06	2	2.5482	0	0	2.28423	0	0	0.260907	2003	deep	1	c	calcari	2.548	38.775	8	0.624	8.2977	0.0829522	g	0
312	seu	447687	4.41739e+06	2	2.5482	0	0	2.28423	0	0	0.260907	2003	deep	1	c	calcari	2.548	38.775	8	0.624	8.2977	0.0829522	tot	12.925
313	seu	448495	4.41678e+06	2	2.5482	0	0	2.28423	0	0	0.260907	2003	shallow	2	b	calcari	2.548	38.775	8	0.624	8.2977	0.124446	a	1.78
314	seu	448495	4.41678e+06	2	2.5482	0	0	2.28423	0	0	0.260907	2003	shallow	2	b	calcari	2.548	38.775	8	0.624	8.2977	0.124446	b	3.2
315	seu	448495	4.41678e+06	2	2.5482	0	0	2.28423	0	0	0.260907	2003	shallow	2	b	calcari	2.548	38.775	8	0.624	8.2977	0.124446	c	3.65
316	seu	448495	4.41678e+06	2	2.5482	0	0	2.28423	0	0	0.260907	2003	shallow	2	b	calcari	2.548	38.775	8	0.624	8.2977	0.124446	d	4.3
317	seu	448495	4.41678e+06	2	2.5482	0	0	2.28423	0	0	0.260907	2003	shallow	2	b	calcari	2.548	38.775	8	0.624	8.2977	0.124446	e	6.95
318	seu	448495	4.41678e+06	2	2.5482	0	0	2.28423	0	0	0.260907	2003	shallow	2	b	calcari	2.548	38.775	8	0.624	8.2977	0.124446	f	6.6
319	seu	448495	4.41678e+06	2	2.5482	0	0	2.28423	0	0	0.260907	2003	shallow	2	b	calcari	2.548	38.775	8	0.624	8.2977	0.124446	g	0.4
320	seu	448495	4.41678e+06	2	2.5482	0	0	2.28423	0	0	0.260907	2003	shallow	2	b	calcari	2.548	38.775	8	0.624	8.2977	0.124446	tot	13.03
321	seu	448495	4.41678e+06	2	2.5482	0	0	2.28423	0	0	0.260907	2004	deep	1	c	calcari	2.548	38.775	8	0.624	8.2977	0.130185	a	0
322	seu	448495	4.41678e+06	2	2.5482	0	0	2.28423	0	0	0.260907	2004	deep	1	c	calcari	2.548	38.775	8	0.624	8.2977	0.130185	b	0.47
323	seu	448495	4.41678e+06	2	2.5482	0	0	2.28423	0	0	0.260907	2004	deep	1	c	calcari	2.548	38.775	8	0.624	8.2977	0.130185	c	0.8
324	seu	448495	4.41678e+06	2	2.5482	0	0	2.28423	0	0	0.260907	2004	deep	1	c	calcari	2.548	38.775	8	0.624	8.2977	0.130185	d	1.6
325	seu	448495	4.41678e+06	2	2.5482	0	0	2.28423	0	0	0.260907	2004	deep	1	c	calcari	2.548	38.775	8	0.624	8.2977	0.130185	e	2.66667
326	seu	448495	4.41678e+06	2	2.5482	0	0	2.28423	0	0	0.260907	2004	deep	1	c	calcari	2.548	38.775	8	0.624	8.2977	0.130185	f	4.4
327	seu	448495	4.41678e+06	2	2.5482	0	0	2.28423	0	0	0.260907	2004	deep	1	c	calcari	2.548	38.775	8	0.624	8.2977	0.130185	g	0.733333
328	seu	448495	4.41678e+06	2	2.5482	0	0	2.28423	0	0	0.260907	2004	deep	1	c	calcari	2.548	38.775	8	0.624	8.2977	0.130185	tot	5.97
329	seu	448385	4.41866e+06	2	2.5482	0	0	2.28423	0	0	0.260907	2005	shallow	1	b	calcari	2.548	38.775	8	0.624	8.2977	0.0820743	a	2.07
330	seu	448385	4.41866e+06	2	2.5482	0	0	2.28423	0	0	0.260907	2005	shallow	1	b	calcari	2.548	38.775	8	0.624	8.2977	0.0820743	b	1
331	seu	448385	4.41866e+06	2	2.5482	0	0	2.28423	0	0	0.260907	2005	shallow	1	b	calcari	2.548	38.775	8	0.624	8.2977	0.0820743	c	0.53
332	seu	448385	4.41866e+06	2	2.5482	0	0	2.28423	0	0	0.260907	2005	shallow	1	b	calcari	2.548	38.775	8	0.624	8.2977	0.0820743	d	1.26667
333	seu	448385	4.41866e+06	2	2.5482	0	0	2.28423	0	0	0.260907	2005	shallow	1	b	calcari	2.548	38.775	8	0.624	8.2977	0.0820743	e	1.66667
334	seu	448385	4.41866e+06	2	2.5482	0	0	2.28423	0	0	0.260907	2005	shallow	1	b	calcari	2.548	38.775	8	0.624	8.2977	0.0820743	f	3.06667
335	seu	448385	4.41866e+06	2	2.5482	0	0	2.28423	0	0	0.260907	2005	shallow	1	b	calcari	2.548	38.775	8	0.624	8.2977	0.0820743	g	0.4
336	seu	448385	4.41866e+06	2	2.5482	0	0	2.28423	0	0	0.260907	2005	shallow	1	b	calcari	2.548	38.775	8	0.624	8.2977	0.0820743	tot	4.77
337	seu	448309	4.41764e+06	2	2.5482	0	0	2.28423	0	0	0.260907	2005	deep	2	b	calcari	2.548	38.775	8	0.624	8.2977	0.106784	a	0.73
338	seu	448309	4.41764e+06	2	2.5482	0	0	2.28423	0	0	0.260907	2005	deep	2	b	calcari	2.548	38.775	8	0.624	8.2977	0.106784	b	1.13
339	seu	448309	4.41764e+06	2	2.5482	0	0	2.28423	0	0	0.260907	2005	deep	2	b	calcari	2.548	38.775	8	0.624	8.2977	0.106784	c	3.13
340	seu	448309	4.41764e+06	2	2.5482	0	0	2.28423	0	0	0.260907	2005	deep	2	b	calcari	2.548	38.775	8	0.624	8.2977	0.106784	d	2.8
341	seu	448309	4.41764e+06	2	2.5482	0	0	2.28423	0	0	0.260907	2005	deep	2	b	calcari	2.548	38.775	8	0.624	8.2977	0.106784	e	3.13333
342	seu	448309	4.41764e+06	2	2.5482	0	0	2.28423	0	0	0.260907	2005	deep	2	b	calcari	2.548	38.775	8	0.624	8.2977	0.106784	f	1.2
343	seu	448309	4.41764e+06	2	2.5482	0	0	2.28423	0	0	0.260907	2005	deep	2	b	calcari	2.548	38.775	8	0.624	8.2977	0.106784	g	0
344	seu	448309	4.41764e+06	2	2.5482	0	0	2.28423	0	0	0.260907	2005	deep	2	b	calcari	2.548	38.775	8	0.624	8.2977	0.106784	tot	8.57
345	seu	448394	4.41694e+06	2	2.5482	0	0	2.28423	0	0	0.260907	2005	deep	3	b	calcari	2.548	38.775	8	0.624	8.2977	0.113765	a	0.8
346	seu	448394	4.41694e+06	2	2.5482	0	0	2.28423	0	0	0.260907	2005	deep	3	b	calcari	2.548	38.775	8	0.624	8.2977	0.113765	b	1.87
347	seu	448394	4.41694e+06	2	2.5482	0	0	2.28423	0	0	0.260907	2005	deep	3	b	calcari	2.548	38.775	8	0.624	8.2977	0.113765	c	1.6
348	seu	448394	4.41694e+06	2	2.5482	0	0	2.28423	0	0	0.260907	2005	deep	3	b	calcari	2.548	38.775	8	0.624	8.2977	0.113765	d	0.466667
349	seu	448394	4.41694e+06	2	2.5482	0	0	2.28423	0	0	0.260907	2005	deep	3	b	calcari	2.548	38.775	8	0.624	8.2977	0.113765	e	0.666667
350	seu	448394	4.41694e+06	2	2.5482	0	0	2.28423	0	0	0.260907	2005	deep	3	b	calcari	2.548	38.775	8	0.624	8.2977	0.113765	f	1.2
351	seu	448394	4.41694e+06	2	2.5482	0	0	2.28423	0	0	0.260907	2005	deep	3	b	calcari	2.548	38.775	8	0.624	8.2977	0.113765	g	0
352	seu	448394	4.41694e+06	2	2.5482	0	0	2.28423	0	0	0.260907	2005	deep	3	b	calcari	2.548	38.775	8	0.624	8.2977	0.113765	tot	7.47
353	seu	448629	4.4186e+06	2	2.5482	0	0	2.28423	0	0	0.260907	2007	deep	1	b	posiroccia	2.284	30.126	1	0.078	6.08	0.058948	a	0.022222
354	seu	448629	4.4186e+06	2	2.5482	0	0	2.28423	0	0	0.260907	2007	deep	1	b	posiroccia	2.284	30.126	1	0.078	6.08	0.058948	b	0.511111
355	seu	448629	4.4186e+06	2	2.5482	0	0	2.28423	0	0	0.260907	2007	deep	1	b	posiroccia	2.284	30.126	1	0.078	6.08	0.058948	c	1.17778
356	seu	448629	4.4186e+06	2	2.5482	0	0	2.28423	0	0	0.260907	2007	deep	1	b	posiroccia	2.284	30.126	1	0.078	6.08	0.058948	d	1.57778
357	seu	448629	4.4186e+06	2	2.5482	0	0	2.28423	0	0	0.260907	2007	deep	1	b	posiroccia	2.284	30.126	1	0.078	6.08	0.058948	e	1.46667
358	seu	448629	4.4186e+06	2	2.5482	0	0	2.28423	0	0	0.260907	2007	deep	1	b	posiroccia	2.284	30.126	1	0.078	6.08	0.058948	f	0.377778
359	seu	448629	4.4186e+06	2	2.5482	0	0	2.28423	0	0	0.260907	2007	deep	1	b	posiroccia	2.284	30.126	1	0.078	6.08	0.058948	g	0.0222222
360	seu	448629	4.4186e+06	2	2.5482	0	0	2.28423	0	0	0.260907	2007	deep	1	b	posiroccia	2.284	30.126	1	0.078	6.08	0.058948	tot	3.43
361	seu	448554	4.4171e+06	2	2.5482	0	0	2.28423	0	0	0.260907	2007	deep	2	b	calcari	2.548	38.775	8	0.624	8.2977	0.119819	a	0.31
362	seu	448554	4.4171e+06	2	2.5482	0	0	2.28423	0	0	0.260907	2007	deep	2	b	calcari	2.548	38.775	8	0.624	8.2977	0.119819	b	0.64
363	seu	448554	4.4171e+06	2	2.5482	0	0	2.28423	0	0	0.260907	2007	deep	2	b	calcari	2.548	38.775	8	0.624	8.2977	0.119819	c	1.27
364	seu	448554	4.4171e+06	2	2.5482	0	0	2.28423	0	0	0.260907	2007	deep	2	b	calcari	2.548	38.775	8	0.624	8.2977	0.119819	d	1.97778
365	seu	448554	4.4171e+06	2	2.5482	0	0	2.28423	0	0	0.260907	2007	deep	2	b	calcari	2.548	38.775	8	0.624	8.2977	0.119819	e	2.82222
366	seu	448554	4.4171e+06	2	2.5482	0	0	2.28423	0	0	0.260907	2007	deep	2	b	calcari	2.548	38.775	8	0.624	8.2977	0.119819	f	1.26667
367	seu	448554	4.4171e+06	2	2.5482	0	0	2.28423	0	0	0.260907	2007	deep	2	b	calcari	2.548	38.775	8	0.624	8.2977	0.119819	g	0.177778
368	seu	448554	4.4171e+06	2	2.5482	0	0	2.28423	0	0	0.260907	2007	deep	2	b	calcari	2.548	38.775	8	0.624	8.2977	0.119819	tot	5.34
369	funtanameiga	449278	4.41668e+06	3	1.03153	0.111421	0	1.99134	0.0139832	0	1.20149	2004	deep	2	b	calcari	1.109	16.247	6	0.3191	6.6939	0.0436161	a	0.13
370	funtanameiga	449278	4.41668e+06	3	1.03153	0.111421	0	1.99134	0.0139832	0	1.20149	2004	deep	2	b	calcari	1.109	16.247	6	0.3191	6.6939	0.0436161	b	1.87
371	funtanameiga	449278	4.41668e+06	3	1.03153	0.111421	0	1.99134	0.0139832	0	1.20149	2004	deep	2	b	calcari	1.109	16.247	6	0.3191	6.6939	0.0436161	c	2.07
372	funtanameiga	449278	4.41668e+06	3	1.03153	0.111421	0	1.99134	0.0139832	0	1.20149	2004	deep	2	b	calcari	1.109	16.247	6	0.3191	6.6939	0.0436161	d	1.53333
373	funtanameiga	449278	4.41668e+06	3	1.03153	0.111421	0	1.99134	0.0139832	0	1.20149	2004	deep	2	b	calcari	1.109	16.247	6	0.3191	6.6939	0.0436161	e	1.93333
374	funtanameiga	449278	4.41668e+06	3	1.03153	0.111421	0	1.99134	0.0139832	0	1.20149	2004	deep	2	b	calcari	1.109	16.247	6	0.3191	6.6939	0.0436161	f	2
375	funtanameiga	449278	4.41668e+06	3	1.03153	0.111421	0	1.99134	0.0139832	0	1.20149	2004	deep	2	b	calcari	1.109	16.247	6	0.3191	6.6939	0.0436161	g	0.2
376	funtanameiga	449278	4.41668e+06	3	1.03153	0.111421	0	1.99134	0.0139832	0	1.20149	2004	deep	2	b	calcari	1.109	16.247	6	0.3191	6.6939	0.0436161	tot	6.9
377	funtanameiga	449264	4.41666e+06	3	1.03153	0.111421	0	1.99134	0.0139832	0	1.20149	2005	deep	2	c	calcari	1.109	16.247	6	0.3191	6.6939	0.0454238	a	0.73
378	funtanameiga	449264	4.41666e+06	3	1.03153	0.111421	0	1.99134	0.0139832	0	1.20149	2005	deep	2	c	calcari	1.109	16.247	6	0.3191	6.6939	0.0454238	b	1.2
379	funtanameiga	449264	4.41666e+06	3	1.03153	0.111421	0	1.99134	0.0139832	0	1.20149	2005	deep	2	c	calcari	1.109	16.247	6	0.3191	6.6939	0.0454238	c	2.33
380	funtanameiga	449264	4.41666e+06	3	1.03153	0.111421	0	1.99134	0.0139832	0	1.20149	2005	deep	2	c	calcari	1.109	16.247	6	0.3191	6.6939	0.0454238	d	2.26667
381	funtanameiga	449264	4.41666e+06	3	1.03153	0.111421	0	1.99134	0.0139832	0	1.20149	2005	deep	2	c	calcari	1.109	16.247	6	0.3191	6.6939	0.0454238	e	1.06667
382	funtanameiga	449264	4.41666e+06	3	1.03153	0.111421	0	1.99134	0.0139832	0	1.20149	2005	deep	2	c	calcari	1.109	16.247	6	0.3191	6.6939	0.0454238	f	1.26667
383	funtanameiga	449264	4.41666e+06	3	1.03153	0.111421	0	1.99134	0.0139832	0	1.20149	2005	deep	2	c	calcari	1.109	16.247	6	0.3191	6.6939	0.0454238	g	0.133333
384	funtanameiga	449264	4.41666e+06	3	1.03153	0.111421	0	1.99134	0.0139832	0	1.20149	2005	deep	2	c	calcari	1.109	16.247	6	0.3191	6.6939	0.0454238	tot	5.77
385	funtanameiga	449038	4.41661e+06	3	1.03153	0.111421	0	1.99134	0.0139832	0	1.20149	2005	deep	1	c	calcari	1.109	16.247	6	0.3191	6.6939	0.0915166	a	0.93
386	funtanameiga	449038	4.41661e+06	3	1.03153	0.111421	0	1.99134	0.0139832	0	1.20149	2005	deep	1	c	calcari	1.109	16.247	6	0.3191	6.6939	0.0915166	b	1.47
387	funtanameiga	449038	4.41661e+06	3	1.03153	0.111421	0	1.99134	0.0139832	0	1.20149	2005	deep	1	c	calcari	1.109	16.247	6	0.3191	6.6939	0.0915166	c	2.6
388	funtanameiga	449038	4.41661e+06	3	1.03153	0.111421	0	1.99134	0.0139832	0	1.20149	2005	deep	1	c	calcari	1.109	16.247	6	0.3191	6.6939	0.0915166	d	1.26667
389	funtanameiga	449038	4.41661e+06	3	1.03153	0.111421	0	1.99134	0.0139832	0	1.20149	2005	deep	1	c	calcari	1.109	16.247	6	0.3191	6.6939	0.0915166	e	0.866667
390	funtanameiga	449038	4.41661e+06	3	1.03153	0.111421	0	1.99134	0.0139832	0	1.20149	2005	deep	1	c	calcari	1.109	16.247	6	0.3191	6.6939	0.0915166	f	0.8
391	funtanameiga	449038	4.41661e+06	3	1.03153	0.111421	0	1.99134	0.0139832	0	1.20149	2005	deep	1	c	calcari	1.109	16.247	6	0.3191	6.6939	0.0915166	g	0.0666667
392	funtanameiga	449038	4.41661e+06	3	1.03153	0.111421	0	1.99134	0.0139832	0	1.20149	2005	deep	1	c	calcari	1.109	16.247	6	0.3191	6.6939	0.0915166	tot	7.37
393	funtanameiga	449413	4.4166e+06	3	1.03153	0.111421	0	1.99134	0.0139832	0	1.20149	2005	deep	3	c	calcari	1.109	16.247	6	0.3191	6.6939	0.0439384	a	1.8
394	funtanameiga	449413	4.4166e+06	3	1.03153	0.111421	0	1.99134	0.0139832	0	1.20149	2005	deep	3	c	calcari	1.109	16.247	6	0.3191	6.6939	0.0439384	b	4.27
395	funtanameiga	449413	4.4166e+06	3	1.03153	0.111421	0	1.99134	0.0139832	0	1.20149	2005	deep	3	c	calcari	1.109	16.247	6	0.3191	6.6939	0.0439384	c	1.73
396	funtanameiga	449413	4.4166e+06	3	1.03153	0.111421	0	1.99134	0.0139832	0	1.20149	2005	deep	3	c	calcari	1.109	16.247	6	0.3191	6.6939	0.0439384	d	0.666667
397	funtanameiga	449413	4.4166e+06	3	1.03153	0.111421	0	1.99134	0.0139832	0	1.20149	2005	deep	3	c	calcari	1.109	16.247	6	0.3191	6.6939	0.0439384	e	1.46667
398	funtanameiga	449413	4.4166e+06	3	1.03153	0.111421	0	1.99134	0.0139832	0	1.20149	2005	deep	3	c	calcari	1.109	16.247	6	0.3191	6.6939	0.0439384	f	1.6
399	funtanameiga	449413	4.4166e+06	3	1.03153	0.111421	0	1.99134	0.0139832	0	1.20149	2005	deep	3	c	calcari	1.109	16.247	6	0.3191	6.6939	0.0439384	g	0.0666667
400	funtanameiga	449413	4.4166e+06	3	1.03153	0.111421	0	1.99134	0.0139832	0	1.20149	2005	deep	3	c	calcari	1.109	16.247	6	0.3191	6.6939	0.0439384	tot	9.7
401	funtanameiga	449542	4.4165e+06	3	1.03153	0.111421	0	1.99134	0.0139832	0	1.20149	2005	deep	4	c	posiroccia	2.013	20.902	6	0.3191	5.7066	0.0387597	a	0
402	funtanameiga	449542	4.4165e+06	3	1.03153	0.111421	0	1.99134	0.0139832	0	1.20149	2005	deep	4	c	posiroccia	2.013	20.902	6	0.3191	5.7066	0.0387597	b	0.0666667
403	funtanameiga	449542	4.4165e+06	3	1.03153	0.111421	0	1.99134	0.0139832	0	1.20149	2005	deep	4	c	posiroccia	2.013	20.902	6	0.3191	5.7066	0.0387597	c	0.4
404	funtanameiga	449542	4.4165e+06	3	1.03153	0.111421	0	1.99134	0.0139832	0	1.20149	2005	deep	4	c	posiroccia	2.013	20.902	6	0.3191	5.7066	0.0387597	d	0.133333
405	funtanameiga	449542	4.4165e+06	3	1.03153	0.111421	0	1.99134	0.0139832	0	1.20149	2005	deep	4	c	posiroccia	2.013	20.902	6	0.3191	5.7066	0.0387597	e	0.466667
406	funtanameiga	449542	4.4165e+06	3	1.03153	0.111421	0	1.99134	0.0139832	0	1.20149	2005	deep	4	c	posiroccia	2.013	20.902	6	0.3191	5.7066	0.0387597	f	0.333333
407	funtanameiga	449542	4.4165e+06	3	1.03153	0.111421	0	1.99134	0.0139832	0	1.20149	2005	deep	4	c	posiroccia	2.013	20.902	6	0.3191	5.7066	0.0387597	g	0
408	funtanameiga	449542	4.4165e+06	3	1.03153	0.111421	0	1.99134	0.0139832	0	1.20149	2005	deep	4	c	posiroccia	2.013	20.902	6	0.3191	5.7066	0.0387597	tot	1.6
409	funtanameiga	449908	4.41617e+06	3	1.03153	0.111421	0	1.99134	0.0139832	0	1.20149	2005	deep	5	c	posiroccia	2.013	20.902	6	0.3191	5.7066	0.0889651	a	0.0666667
410	funtanameiga	449908	4.41617e+06	3	1.03153	0.111421	0	1.99134	0.0139832	0	1.20149	2005	deep	5	c	posiroccia	2.013	20.902	6	0.3191	5.7066	0.0889651	b	0
411	funtanameiga	449908	4.41617e+06	3	1.03153	0.111421	0	1.99134	0.0139832	0	1.20149	2005	deep	5	c	posiroccia	2.013	20.902	6	0.3191	5.7066	0.0889651	c	0.266667
412	funtanameiga	449908	4.41617e+06	3	1.03153	0.111421	0	1.99134	0.0139832	0	1.20149	2005	deep	5	c	posiroccia	2.013	20.902	6	0.3191	5.7066	0.0889651	d	0.4
413	funtanameiga	449908	4.41617e+06	3	1.03153	0.111421	0	1.99134	0.0139832	0	1.20149	2005	deep	5	c	posiroccia	2.013	20.902	6	0.3191	5.7066	0.0889651	e	0.6
414	funtanameiga	449908	4.41617e+06	3	1.03153	0.111421	0	1.99134	0.0139832	0	1.20149	2005	deep	5	c	posiroccia	2.013	20.902	6	0.3191	5.7066	0.0889651	f	1.2
415	funtanameiga	449908	4.41617e+06	3	1.03153	0.111421	0	1.99134	0.0139832	0	1.20149	2005	deep	5	c	posiroccia	2.013	20.902	6	0.3191	5.7066	0.0889651	g	0.333333
416	funtanameiga	449908	4.41617e+06	3	1.03153	0.111421	0	1.99134	0.0139832	0	1.20149	2005	deep	5	c	posiroccia	2.013	20.902	6	0.3191	5.7066	0.0889651	tot	5.53
417	funtanameiga	450618	4.41579e+06	3	1.03153	0.111421	0	1.99134	0.0139832	0	1.20149	2005	deep	6	c	posiroccia	2.013	20.902	6	0.3191	5.7066	0.065733	a	0.466667
418	funtanameiga	450618	4.41579e+06	3	1.03153	0.111421	0	1.99134	0.0139832	0	1.20149	2005	deep	6	c	posiroccia	2.013	20.902	6	0.3191	5.7066	0.065733	b	0.6
419	funtanameiga	450618	4.41579e+06	3	1.03153	0.111421	0	1.99134	0.0139832	0	1.20149	2005	deep	6	c	posiroccia	2.013	20.902	6	0.3191	5.7066	0.065733	c	1.46667
420	funtanameiga	450618	4.41579e+06	3	1.03153	0.111421	0	1.99134	0.0139832	0	1.20149	2005	deep	6	c	posiroccia	2.013	20.902	6	0.3191	5.7066	0.065733	d	2
421	funtanameiga	450618	4.41579e+06	3	1.03153	0.111421	0	1.99134	0.0139832	0	1.20149	2005	deep	6	c	posiroccia	2.013	20.902	6	0.3191	5.7066	0.065733	e	2.6
422	funtanameiga	450618	4.41579e+06	3	1.03153	0.111421	0	1.99134	0.0139832	0	1.20149	2005	deep	6	c	posiroccia	2.013	20.902	6	0.3191	5.7066	0.065733	f	1.33333
423	funtanameiga	450618	4.41579e+06	3	1.03153	0.111421	0	1.99134	0.0139832	0	1.20149	2005	deep	6	c	posiroccia	2.013	20.902	6	0.3191	5.7066	0.065733	g	0.0666667
424	funtanameiga	450618	4.41579e+06	3	1.03153	0.111421	0	1.99134	0.0139832	0	1.20149	2005	deep	6	c	posiroccia	2.013	20.902	6	0.3191	5.7066	0.065733	tot	0.93
425	funtanameiga	449277	4.41642e+06	3	1.03153	0.111421	0	1.99134	0.0139832	0	1.20149	2007	deep	1	c	calcari	1.109	16.247	6	0.3191	6.6939	0.0641361	a	0.87
426	funtanameiga	449277	4.41642e+06	3	1.03153	0.111421	0	1.99134	0.0139832	0	1.20149	2007	deep	1	c	calcari	1.109	16.247	6	0.3191	6.6939	0.0641361	b	3.87
427	funtanameiga	449277	4.41642e+06	3	1.03153	0.111421	0	1.99134	0.0139832	0	1.20149	2007	deep	1	c	calcari	1.109	16.247	6	0.3191	6.6939	0.0641361	c	2.62
428	funtanameiga	449277	4.41642e+06	3	1.03153	0.111421	0	1.99134	0.0139832	0	1.20149	2007	deep	1	c	calcari	1.109	16.247	6	0.3191	6.6939	0.0641361	d	2.44444
429	funtanameiga	449277	4.41642e+06	3	1.03153	0.111421	0	1.99134	0.0139832	0	1.20149	2007	deep	1	c	calcari	1.109	16.247	6	0.3191	6.6939	0.0641361	e	1.93333
430	funtanameiga	449277	4.41642e+06	3	1.03153	0.111421	0	1.99134	0.0139832	0	1.20149	2007	deep	1	c	calcari	1.109	16.247	6	0.3191	6.6939	0.0641361	f	0.555556
431	funtanameiga	449277	4.41642e+06	3	1.03153	0.111421	0	1.99134	0.0139832	0	1.20149	2007	deep	1	c	calcari	1.109	16.247	6	0.3191	6.6939	0.0641361	g	0.0444444
432	funtanameiga	449277	4.41642e+06	3	1.03153	0.111421	0	1.99134	0.0139832	0	1.20149	2007	deep	1	c	calcari	1.109	16.247	6	0.3191	6.6939	0.0641361	tot	9.84
433	funtanameiga	450124	4.41639e+06	3	1.03153	0.111421	0	1.99134	0.0139832	0	1.20149	2007	deep	2	c	posiroccia	2.013	20.902	6	0.3191	5.7066	0.0829855	a	0
434	funtanameiga	450124	4.41639e+06	3	1.03153	0.111421	0	1.99134	0.0139832	0	1.20149	2007	deep	2	c	posiroccia	2.013	20.902	6	0.3191	5.7066	0.0829855	b	0.0666667
435	funtanameiga	450124	4.41639e+06	3	1.03153	0.111421	0	1.99134	0.0139832	0	1.20149	2007	deep	2	c	posiroccia	2.013	20.902	6	0.3191	5.7066	0.0829855	c	0.333333
436	funtanameiga	450124	4.41639e+06	3	1.03153	0.111421	0	1.99134	0.0139832	0	1.20149	2007	deep	2	c	posiroccia	2.013	20.902	6	0.3191	5.7066	0.0829855	d	0.711111
437	funtanameiga	450124	4.41639e+06	3	1.03153	0.111421	0	1.99134	0.0139832	0	1.20149	2007	deep	2	c	posiroccia	2.013	20.902	6	0.3191	5.7066	0.0829855	e	1.2
438	funtanameiga	450124	4.41639e+06	3	1.03153	0.111421	0	1.99134	0.0139832	0	1.20149	2007	deep	2	c	posiroccia	2.013	20.902	6	0.3191	5.7066	0.0829855	f	1.04444
439	funtanameiga	450124	4.41639e+06	3	1.03153	0.111421	0	1.99134	0.0139832	0	1.20149	2007	deep	2	c	posiroccia	2.013	20.902	6	0.3191	5.7066	0.0829855	g	0.0888889
440	funtanameiga	450124	4.41639e+06	3	1.03153	0.111421	0	1.99134	0.0139832	0	1.20149	2007	deep	2	c	posiroccia	2.013	20.902	6	0.3191	5.7066	0.0829855	tot	1.92
441	sanmarco	451612	4.41209e+06	3	1.03153	0.111421	0	1.99134	0.0139832	0	1.20149	2003	shallow	1	b	basalto	14.544	4.125	1	0.0532	3.4565	0.0899216	a	0
442	sanmarco	451612	4.41209e+06	3	1.03153	0.111421	0	1.99134	0.0139832	0	1.20149	2003	shallow	1	b	basalto	14.544	4.125	1	0.0532	3.4565	0.0899216	b	0
443	sanmarco	451612	4.41209e+06	3	1.03153	0.111421	0	1.99134	0.0139832	0	1.20149	2003	shallow	1	b	basalto	14.544	4.125	1	0.0532	3.4565	0.0899216	c	0.0666667
444	sanmarco	451612	4.41209e+06	3	1.03153	0.111421	0	1.99134	0.0139832	0	1.20149	2003	shallow	1	b	basalto	14.544	4.125	1	0.0532	3.4565	0.0899216	d	1.06667
445	sanmarco	451612	4.41209e+06	3	1.03153	0.111421	0	1.99134	0.0139832	0	1.20149	2003	shallow	1	b	basalto	14.544	4.125	1	0.0532	3.4565	0.0899216	e	3.66667
446	sanmarco	451612	4.41209e+06	3	1.03153	0.111421	0	1.99134	0.0139832	0	1.20149	2003	shallow	1	b	basalto	14.544	4.125	1	0.0532	3.4565	0.0899216	f	5.66667
447	sanmarco	451612	4.41209e+06	3	1.03153	0.111421	0	1.99134	0.0139832	0	1.20149	2003	shallow	1	b	basalto	14.544	4.125	1	0.0532	3.4565	0.0899216	g	1.26667
448	sanmarco	451612	4.41209e+06	3	1.03153	0.111421	0	1.99134	0.0139832	0	1.20149	2003	shallow	1	b	basalto	14.544	4.125	1	0.0532	3.4565	0.0899216	tot	5.9
449	sanmarco	451686	4.41208e+06	3	1.03153	0.111421	0	1.99134	0.0139832	0	1.20149	2003	deep	2	b	basalto	14.544	4.125	1	0.0532	3.4565	0.0852389	a	0
450	sanmarco	451686	4.41208e+06	3	1.03153	0.111421	0	1.99134	0.0139832	0	1.20149	2003	deep	2	b	basalto	14.544	4.125	1	0.0532	3.4565	0.0852389	b	0.1
451	sanmarco	451686	4.41208e+06	3	1.03153	0.111421	0	1.99134	0.0139832	0	1.20149	2003	deep	2	b	basalto	14.544	4.125	1	0.0532	3.4565	0.0852389	c	0.2
452	sanmarco	451686	4.41208e+06	3	1.03153	0.111421	0	1.99134	0.0139832	0	1.20149	2003	deep	2	b	basalto	14.544	4.125	1	0.0532	3.4565	0.0852389	d	0.4
453	sanmarco	451686	4.41208e+06	3	1.03153	0.111421	0	1.99134	0.0139832	0	1.20149	2003	deep	2	b	basalto	14.544	4.125	1	0.0532	3.4565	0.0852389	e	4.2
454	sanmarco	451686	4.41208e+06	3	1.03153	0.111421	0	1.99134	0.0139832	0	1.20149	2003	deep	2	b	basalto	14.544	4.125	1	0.0532	3.4565	0.0852389	f	3
455	sanmarco	451686	4.41208e+06	3	1.03153	0.111421	0	1.99134	0.0139832	0	1.20149	2003	deep	2	b	basalto	14.544	4.125	1	0.0532	3.4565	0.0852389	g	1
456	sanmarco	451686	4.41208e+06	3	1.03153	0.111421	0	1.99134	0.0139832	0	1.20149	2003	deep	2	b	basalto	14.544	4.125	1	0.0532	3.4565	0.0852389	tot	4.6
457	sanmarco	451317	4.4128e+06	3	1.03153	0.111421	0	1.99134	0.0139832	0	1.20149	2007	deep	1	c	basalto	14.544	4.125	1	0.0532	3.4565	0.118871	a	0
458	sanmarco	451317	4.4128e+06	3	1.03153	0.111421	0	1.99134	0.0139832	0	1.20149	2007	deep	1	c	basalto	14.544	4.125	1	0.0532	3.4565	0.118871	b	0.0222222
459	sanmarco	451317	4.4128e+06	3	1.03153	0.111421	0	1.99134	0.0139832	0	1.20149	2007	deep	1	c	basalto	14.544	4.125	1	0.0532	3.4565	0.118871	c	0.0666667
460	sanmarco	451317	4.4128e+06	3	1.03153	0.111421	0	1.99134	0.0139832	0	1.20149	2007	deep	1	c	basalto	14.544	4.125	1	0.0532	3.4565	0.118871	d	0.222222
461	sanmarco	451317	4.4128e+06	3	1.03153	0.111421	0	1.99134	0.0139832	0	1.20149	2007	deep	1	c	basalto	14.544	4.125	1	0.0532	3.4565	0.118871	e	0.666667
462	sanmarco	451317	4.4128e+06	3	1.03153	0.111421	0	1.99134	0.0139832	0	1.20149	2007	deep	1	c	basalto	14.544	4.125	1	0.0532	3.4565	0.118871	f	0.644444
463	sanmarco	451317	4.4128e+06	3	1.03153	0.111421	0	1.99134	0.0139832	0	1.20149	2007	deep	1	c	basalto	14.544	4.125	1	0.0532	3.4565	0.118871	g	0
464	sanmarco	451317	4.4128e+06	3	1.03153	0.111421	0	1.99134	0.0139832	0	1.20149	2007	deep	1	c	basalto	14.544	4.125	1	0.0532	3.4565	0.118871	tot	1.9
465	sanmarco	451612	4.41209e+06	3	1.03153	0.111421	0	1.99134	0.0139832	0	1.20149	2007	shallow	2	c	basalto	14.544	4.125	1	0.0532	3.4565	0.074898	a	0.111111
466	sanmarco	451612	4.41209e+06	3	1.03153	0.111421	0	1.99134	0.0139832	0	1.20149	2007	shallow	2	c	basalto	14.544	4.125	1	0.0532	3.4565	0.074898	b	0.0888889
467	sanmarco	451612	4.41209e+06	3	1.03153	0.111421	0	1.99134	0.0139832	0	1.20149	2007	shallow	2	c	basalto	14.544	4.125	1	0.0532	3.4565	0.074898	c	0.155556
468	sanmarco	451612	4.41209e+06	3	1.03153	0.111421	0	1.99134	0.0139832	0	1.20149	2007	shallow	2	c	basalto	14.544	4.125	1	0.0532	3.4565	0.074898	d	0.488889
469	sanmarco	451612	4.41209e+06	3	1.03153	0.111421	0	1.99134	0.0139832	0	1.20149	2007	shallow	2	c	basalto	14.544	4.125	1	0.0532	3.4565	0.074898	e	1.42222
470	sanmarco	451612	4.41209e+06	3	1.03153	0.111421	0	1.99134	0.0139832	0	1.20149	2007	shallow	2	c	basalto	14.544	4.125	1	0.0532	3.4565	0.074898	f	1.06667
471	sanmarco	451612	4.41209e+06	3	1.03153	0.111421	0	1.99134	0.0139832	0	1.20149	2007	shallow	2	c	basalto	14.544	4.125	1	0.0532	3.4565	0.074898	g	0.111111
472	sanmarco	451612	4.41209e+06	3	1.03153	0.111421	0	1.99134	0.0139832	0	1.20149	2007	shallow	2	c	basalto	14.544	4.125	1	0.0532	3.4565	0.074898	tot	0.86
473	maldiventre	440246	4.42592e+06	4	0	0.0805905	1.85182	0.499624	1.38739	0	0	2004	shallow	1	b	granito	1.85178	30.341	1	0.0157	6.0669	0.0808828	a	0.13
474	maldiventre	440246	4.42592e+06	4	0	0.0805905	1.85182	0.499624	1.38739	0	0	2004	shallow	1	b	granito	1.85178	30.341	1	0.0157	6.0669	0.0808828	b	2.27
475	maldiventre	440246	4.42592e+06	4	0	0.0805905	1.85182	0.499624	1.38739	0	0	2004	shallow	1	b	granito	1.85178	30.341	1	0.0157	6.0669	0.0808828	c	2
476	maldiventre	440246	4.42592e+06	4	0	0.0805905	1.85182	0.499624	1.38739	0	0	2004	shallow	1	b	granito	1.85178	30.341	1	0.0157	6.0669	0.0808828	d	2
477	maldiventre	440246	4.42592e+06	4	0	0.0805905	1.85182	0.499624	1.38739	0	0	2004	shallow	1	b	granito	1.85178	30.341	1	0.0157	6.0669	0.0808828	e	5.66667
478	maldiventre	440246	4.42592e+06	4	0	0.0805905	1.85182	0.499624	1.38739	0	0	2004	shallow	1	b	granito	1.85178	30.341	1	0.0157	6.0669	0.0808828	f	5.8
479	maldiventre	440246	4.42592e+06	4	0	0.0805905	1.85182	0.499624	1.38739	0	0	2004	shallow	1	b	granito	1.85178	30.341	1	0.0157	6.0669	0.0808828	g	1.06667
480	maldiventre	440246	4.42592e+06	4	0	0.0805905	1.85182	0.499624	1.38739	0	0	2004	shallow	1	b	granito	1.85178	30.341	1	0.0157	6.0669	0.0808828	tot	11.67
481	maldiventre	442036	4.42834e+06	4	0	0.0805905	1.85182	0.499624	1.38739	0	0	2005	deep	1	c	granito	1.85178	30.341	1	0.0157	6.0669	0.115395	a	0.53
482	maldiventre	442036	4.42834e+06	4	0	0.0805905	1.85182	0.499624	1.38739	0	0	2005	deep	1	c	granito	1.85178	30.341	1	0.0157	6.0669	0.115395	b	2.13
483	maldiventre	442036	4.42834e+06	4	0	0.0805905	1.85182	0.499624	1.38739	0	0	2005	deep	1	c	granito	1.85178	30.341	1	0.0157	6.0669	0.115395	c	0.93
484	maldiventre	442036	4.42834e+06	4	0	0.0805905	1.85182	0.499624	1.38739	0	0	2005	deep	1	c	granito	1.85178	30.341	1	0.0157	6.0669	0.115395	d	0.133333
485	maldiventre	442036	4.42834e+06	4	0	0.0805905	1.85182	0.499624	1.38739	0	0	2005	deep	1	c	granito	1.85178	30.341	1	0.0157	6.0669	0.115395	e	0.733333
486	maldiventre	442036	4.42834e+06	4	0	0.0805905	1.85182	0.499624	1.38739	0	0	2005	deep	1	c	granito	1.85178	30.341	1	0.0157	6.0669	0.115395	f	2.33333
487	maldiventre	442036	4.42834e+06	4	0	0.0805905	1.85182	0.499624	1.38739	0	0	2005	deep	1	c	granito	1.85178	30.341	1	0.0157	6.0669	0.115395	g	1
488	maldiventre	442036	4.42834e+06	4	0	0.0805905	1.85182	0.499624	1.38739	0	0	2005	deep	1	c	granito	1.85178	30.341	1	0.0157	6.0669	0.115395	tot	4.87
489	maldiventre	441861	4.42816e+06	4	0	0.0805905	1.85182	0.499624	1.38739	0	0	2005	deep	2	c	granito	1.85178	30.341	1	0.0157	6.0669	0.124554	a	1.73
490	maldiventre	441861	4.42816e+06	4	0	0.0805905	1.85182	0.499624	1.38739	0	0	2005	deep	2	c	granito	1.85178	30.341	1	0.0157	6.0669	0.124554	b	2.93
491	maldiventre	441861	4.42816e+06	4	0	0.0805905	1.85182	0.499624	1.38739	0	0	2005	deep	2	c	granito	1.85178	30.341	1	0.0157	6.0669	0.124554	c	0.2
492	maldiventre	441861	4.42816e+06	4	0	0.0805905	1.85182	0.499624	1.38739	0	0	2005	deep	2	c	granito	1.85178	30.341	1	0.0157	6.0669	0.124554	d	0.333333
493	maldiventre	441861	4.42816e+06	4	0	0.0805905	1.85182	0.499624	1.38739	0	0	2005	deep	2	c	granito	1.85178	30.341	1	0.0157	6.0669	0.124554	e	1
494	maldiventre	441861	4.42816e+06	4	0	0.0805905	1.85182	0.499624	1.38739	0	0	2005	deep	2	c	granito	1.85178	30.341	1	0.0157	6.0669	0.124554	f	4.93333
495	maldiventre	441861	4.42816e+06	4	0	0.0805905	1.85182	0.499624	1.38739	0	0	2005	deep	2	c	granito	1.85178	30.341	1	0.0157	6.0669	0.124554	g	1.46667
496	maldiventre	441861	4.42816e+06	4	0	0.0805905	1.85182	0.499624	1.38739	0	0	2005	deep	2	c	granito	1.85178	30.341	1	0.0157	6.0669	0.124554	tot	5.83
497	maldiventre	441955	4.42801e+06	4	0	0.0805905	1.85182	0.499624	1.38739	0	0	2005	deep	3	c	granito	1.85178	30.341	1	0.0157	6.0669	0.123559	a	0.07
498	maldiventre	441955	4.42801e+06	4	0	0.0805905	1.85182	0.499624	1.38739	0	0	2005	deep	3	c	granito	1.85178	30.341	1	0.0157	6.0669	0.123559	b	3.93
499	maldiventre	441955	4.42801e+06	4	0	0.0805905	1.85182	0.499624	1.38739	0	0	2005	deep	3	c	granito	1.85178	30.341	1	0.0157	6.0669	0.123559	c	1.07
500	maldiventre	441955	4.42801e+06	4	0	0.0805905	1.85182	0.499624	1.38739	0	0	2005	deep	3	c	granito	1.85178	30.341	1	0.0157	6.0669	0.123559	d	0.466667
501	maldiventre	441955	4.42801e+06	4	0	0.0805905	1.85182	0.499624	1.38739	0	0	2005	deep	3	c	granito	1.85178	30.341	1	0.0157	6.0669	0.123559	e	0.933333
502	maldiventre	441955	4.42801e+06	4	0	0.0805905	1.85182	0.499624	1.38739	0	0	2005	deep	3	c	granito	1.85178	30.341	1	0.0157	6.0669	0.123559	f	2.46667
503	maldiventre	441955	4.42801e+06	4	0	0.0805905	1.85182	0.499624	1.38739	0	0	2005	deep	3	c	granito	1.85178	30.341	1	0.0157	6.0669	0.123559	g	0.666667
504	maldiventre	441955	4.42801e+06	4	0	0.0805905	1.85182	0.499624	1.38739	0	0	2005	deep	3	c	granito	1.85178	30.341	1	0.0157	6.0669	0.123559	tot	6.3
505	maldiventre	441038	4.4275e+06	4	0	0.0805905	1.85182	0.499624	1.38739	0	0	2005	deep	4	b	granito	1.85178	30.341	1	0.0157	6.0669	0.091169	a	2.6
506	maldiventre	441038	4.4275e+06	4	0	0.0805905	1.85182	0.499624	1.38739	0	0	2005	deep	4	b	granito	1.85178	30.341	1	0.0157	6.0669	0.091169	b	1.6
507	maldiventre	441038	4.4275e+06	4	0	0.0805905	1.85182	0.499624	1.38739	0	0	2005	deep	4	b	granito	1.85178	30.341	1	0.0157	6.0669	0.091169	c	0.53
508	maldiventre	441038	4.4275e+06	4	0	0.0805905	1.85182	0.499624	1.38739	0	0	2005	deep	4	b	granito	1.85178	30.341	1	0.0157	6.0669	0.091169	d	0.866667
509	maldiventre	441038	4.4275e+06	4	0	0.0805905	1.85182	0.499624	1.38739	0	0	2005	deep	4	b	granito	1.85178	30.341	1	0.0157	6.0669	0.091169	e	1.6
510	maldiventre	441038	4.4275e+06	4	0	0.0805905	1.85182	0.499624	1.38739	0	0	2005	deep	4	b	granito	1.85178	30.341	1	0.0157	6.0669	0.091169	f	4.13333
511	maldiventre	441038	4.4275e+06	4	0	0.0805905	1.85182	0.499624	1.38739	0	0	2005	deep	4	b	granito	1.85178	30.341	1	0.0157	6.0669	0.091169	g	0.533333
512	maldiventre	441038	4.4275e+06	4	0	0.0805905	1.85182	0.499624	1.38739	0	0	2005	deep	4	b	granito	1.85178	30.341	1	0.0157	6.0669	0.091169	tot	8.33
513	maldiventre	440179	4.42718e+06	4	0	0.0805905	1.85182	0.499624	1.38739	0	0	2005	deep	5	a	granito	1.85178	30.341	1	0.0157	6.0669	0.118817	a	3.33
514	maldiventre	440179	4.42718e+06	4	0	0.0805905	1.85182	0.499624	1.38739	0	0	2005	deep	5	a	granito	1.85178	30.341	1	0.0157	6.0669	0.118817	b	2.6
515	maldiventre	440179	4.42718e+06	4	0	0.0805905	1.85182	0.499624	1.38739	0	0	2005	deep	5	a	granito	1.85178	30.341	1	0.0157	6.0669	0.118817	c	0.33
516	maldiventre	440179	4.42718e+06	4	0	0.0805905	1.85182	0.499624	1.38739	0	0	2005	deep	5	a	granito	1.85178	30.341	1	0.0157	6.0669	0.118817	d	0.466667
517	maldiventre	440179	4.42718e+06	4	0	0.0805905	1.85182	0.499624	1.38739	0	0	2005	deep	5	a	granito	1.85178	30.341	1	0.0157	6.0669	0.118817	e	0.8
518	maldiventre	440179	4.42718e+06	4	0	0.0805905	1.85182	0.499624	1.38739	0	0	2005	deep	5	a	granito	1.85178	30.341	1	0.0157	6.0669	0.118817	f	3.4
519	maldiventre	440179	4.42718e+06	4	0	0.0805905	1.85182	0.499624	1.38739	0	0	2005	deep	5	a	granito	1.85178	30.341	1	0.0157	6.0669	0.118817	g	2
520	maldiventre	440179	4.42718e+06	4	0	0.0805905	1.85182	0.499624	1.38739	0	0	2005	deep	5	a	granito	1.85178	30.341	1	0.0157	6.0669	0.118817	tot	8.37
521	maldiventre	440185	4.4269e+06	4	0	0.0805905	1.85182	0.499624	1.38739	0	0	2005	deep	6	a	granito	1.85178	30.341	1	0.0157	6.0669	0.0719027	a	4.27
522	maldiventre	440185	4.4269e+06	4	0	0.0805905	1.85182	0.499624	1.38739	0	0	2005	deep	6	a	granito	1.85178	30.341	1	0.0157	6.0669	0.0719027	b	1.87
523	maldiventre	440185	4.4269e+06	4	0	0.0805905	1.85182	0.499624	1.38739	0	0	2005	deep	6	a	granito	1.85178	30.341	1	0.0157	6.0669	0.0719027	c	0.93
524	maldiventre	440185	4.4269e+06	4	0	0.0805905	1.85182	0.499624	1.38739	0	0	2005	deep	6	a	granito	1.85178	30.341	1	0.0157	6.0669	0.0719027	d	0.133333
525	maldiventre	440185	4.4269e+06	4	0	0.0805905	1.85182	0.499624	1.38739	0	0	2005	deep	6	a	granito	1.85178	30.341	1	0.0157	6.0669	0.0719027	e	1.46667
526	maldiventre	440185	4.4269e+06	4	0	0.0805905	1.85182	0.499624	1.38739	0	0	2005	deep	6	a	granito	1.85178	30.341	1	0.0157	6.0669	0.0719027	f	4.33333
527	maldiventre	440185	4.4269e+06	4	0	0.0805905	1.85182	0.499624	1.38739	0	0	2005	deep	6	a	granito	1.85178	30.341	1	0.0157	6.0669	0.0719027	g	1.26667
528	maldiventre	440185	4.4269e+06	4	0	0.0805905	1.85182	0.499624	1.38739	0	0	2005	deep	6	a	granito	1.85178	30.341	1	0.0157	6.0669	0.0719027	tot	10.93
529	maldiventre	440121	4.42666e+06	4	0	0.0805905	1.85182	0.499624	1.38739	0	0	2005	deep	7	a	granito	1.85178	30.341	1	0.0157	6.0669	0.0874022	a	4.47
530	maldiventre	440121	4.42666e+06	4	0	0.0805905	1.85182	0.499624	1.38739	0	0	2005	deep	7	a	granito	1.85178	30.341	1	0.0157	6.0669	0.0874022	b	3.73
531	maldiventre	440121	4.42666e+06	4	0	0.0805905	1.85182	0.499624	1.38739	0	0	2005	deep	7	a	granito	1.85178	30.341	1	0.0157	6.0669	0.0874022	c	0.67
532	maldiventre	440121	4.42666e+06	4	0	0.0805905	1.85182	0.499624	1.38739	0	0	2005	deep	7	a	granito	1.85178	30.341	1	0.0157	6.0669	0.0874022	d	0
533	maldiventre	440121	4.42666e+06	4	0	0.0805905	1.85182	0.499624	1.38739	0	0	2005	deep	7	a	granito	1.85178	30.341	1	0.0157	6.0669	0.0874022	e	0.266667
534	maldiventre	440121	4.42666e+06	4	0	0.0805905	1.85182	0.499624	1.38739	0	0	2005	deep	7	a	granito	1.85178	30.341	1	0.0157	6.0669	0.0874022	f	0.866667
535	maldiventre	440121	4.42666e+06	4	0	0.0805905	1.85182	0.499624	1.38739	0	0	2005	deep	7	a	granito	1.85178	30.341	1	0.0157	6.0669	0.0874022	g	0.8
536	maldiventre	440121	4.42666e+06	4	0	0.0805905	1.85182	0.499624	1.38739	0	0	2005	deep	7	a	granito	1.85178	30.341	1	0.0157	6.0669	0.0874022	tot	11.13
537	maldiventre	440103	4.42635e+06	4	0	0.0805905	1.85182	0.499624	1.38739	0	0	2005	deep	8	b	granito	1.85178	30.341	1	0.0157	6.0669	0.0673864	a	1.27
538	maldiventre	440103	4.42635e+06	4	0	0.0805905	1.85182	0.499624	1.38739	0	0	2005	deep	8	b	granito	1.85178	30.341	1	0.0157	6.0669	0.0673864	b	2.2
539	maldiventre	440103	4.42635e+06	4	0	0.0805905	1.85182	0.499624	1.38739	0	0	2005	deep	8	b	granito	1.85178	30.341	1	0.0157	6.0669	0.0673864	c	0.73
540	maldiventre	440103	4.42635e+06	4	0	0.0805905	1.85182	0.499624	1.38739	0	0	2005	deep	8	b	granito	1.85178	30.341	1	0.0157	6.0669	0.0673864	d	1.13333
541	maldiventre	440103	4.42635e+06	4	0	0.0805905	1.85182	0.499624	1.38739	0	0	2005	deep	8	b	granito	1.85178	30.341	1	0.0157	6.0669	0.0673864	e	0.6
542	maldiventre	440103	4.42635e+06	4	0	0.0805905	1.85182	0.499624	1.38739	0	0	2005	deep	8	b	granito	1.85178	30.341	1	0.0157	6.0669	0.0673864	f	0.6
543	maldiventre	440103	4.42635e+06	4	0	0.0805905	1.85182	0.499624	1.38739	0	0	2005	deep	8	b	granito	1.85178	30.341	1	0.0157	6.0669	0.0673864	g	0.133333
544	maldiventre	440103	4.42635e+06	4	0	0.0805905	1.85182	0.499624	1.38739	0	0	2005	deep	8	b	granito	1.85178	30.341	1	0.0157	6.0669	0.0673864	tot	7.77
545	maldiventre	439796	4.42585e+06	4	0	0.0805905	1.85182	0.499624	1.38739	0	0	2005	deep	9	b	granito	1.85178	30.341	1	0.0157	6.0669	0.101721	a	7.47
546	maldiventre	439796	4.42585e+06	4	0	0.0805905	1.85182	0.499624	1.38739	0	0	2005	deep	9	b	granito	1.85178	30.341	1	0.0157	6.0669	0.101721	b	6.93
547	maldiventre	439796	4.42585e+06	4	0	0.0805905	1.85182	0.499624	1.38739	0	0	2005	deep	9	b	granito	1.85178	30.341	1	0.0157	6.0669	0.101721	c	0.87
548	maldiventre	439796	4.42585e+06	4	0	0.0805905	1.85182	0.499624	1.38739	0	0	2005	deep	9	b	granito	1.85178	30.341	1	0.0157	6.0669	0.101721	d	1.06667
549	maldiventre	439796	4.42585e+06	4	0	0.0805905	1.85182	0.499624	1.38739	0	0	2005	deep	9	b	granito	1.85178	30.341	1	0.0157	6.0669	0.101721	e	0.466667
550	maldiventre	439796	4.42585e+06	4	0	0.0805905	1.85182	0.499624	1.38739	0	0	2005	deep	9	b	granito	1.85178	30.341	1	0.0157	6.0669	0.101721	f	0.8
551	maldiventre	439796	4.42585e+06	4	0	0.0805905	1.85182	0.499624	1.38739	0	0	2005	deep	9	b	granito	1.85178	30.341	1	0.0157	6.0669	0.101721	g	0.2
552	maldiventre	439796	4.42585e+06	4	0	0.0805905	1.85182	0.499624	1.38739	0	0	2005	deep	9	b	granito	1.85178	30.341	1	0.0157	6.0669	0.101721	tot	18.6
553	maldiventre	441757	4.42805e+06	4	0	0.0805905	1.85182	0.499624	1.38739	0	0	2007	deep	1	c	granito	1.85178	30.341	1	0.0157	6.0669	0.120331	a	0.044444
554	maldiventre	441757	4.42805e+06	4	0	0.0805905	1.85182	0.499624	1.38739	0	0	2007	deep	1	c	granito	1.85178	30.341	1	0.0157	6.0669	0.120331	b	1.15556
555	maldiventre	441757	4.42805e+06	4	0	0.0805905	1.85182	0.499624	1.38739	0	0	2007	deep	1	c	granito	1.85178	30.341	1	0.0157	6.0669	0.120331	c	1.35556
556	maldiventre	441757	4.42805e+06	4	0	0.0805905	1.85182	0.499624	1.38739	0	0	2007	deep	1	c	granito	1.85178	30.341	1	0.0157	6.0669	0.120331	d	3.08889
557	maldiventre	441757	4.42805e+06	4	0	0.0805905	1.85182	0.499624	1.38739	0	0	2007	deep	1	c	granito	1.85178	30.341	1	0.0157	6.0669	0.120331	e	3.02222
558	maldiventre	441757	4.42805e+06	4	0	0.0805905	1.85182	0.499624	1.38739	0	0	2007	deep	1	c	granito	1.85178	30.341	1	0.0157	6.0669	0.120331	f	1.73333
559	maldiventre	441757	4.42805e+06	4	0	0.0805905	1.85182	0.499624	1.38739	0	0	2007	deep	1	c	granito	1.85178	30.341	1	0.0157	6.0669	0.120331	g	0.311111
560	maldiventre	441757	4.42805e+06	4	0	0.0805905	1.85182	0.499624	1.38739	0	0	2007	deep	1	c	granito	1.85178	30.341	1	0.0157	6.0669	0.120331	tot	4.67
561	maldiventre	440962	4.4274e+06	4	0	0.0805905	1.85182	0.499624	1.38739	0	0	2007	shallow	2	b	granito	1.85178	30.341	1	0.0157	6.0669	0.090058	a	0.355556
562	maldiventre	440962	4.4274e+06	4	0	0.0805905	1.85182	0.499624	1.38739	0	0	2007	shallow	2	b	granito	1.85178	30.341	1	0.0157	6.0669	0.090058	b	1.08889
563	maldiventre	440962	4.4274e+06	4	0	0.0805905	1.85182	0.499624	1.38739	0	0	2007	shallow	2	b	granito	1.85178	30.341	1	0.0157	6.0669	0.090058	c	0.755556
564	maldiventre	440962	4.4274e+06	4	0	0.0805905	1.85182	0.499624	1.38739	0	0	2007	shallow	2	b	granito	1.85178	30.341	1	0.0157	6.0669	0.090058	d	1.33333
565	maldiventre	440962	4.4274e+06	4	0	0.0805905	1.85182	0.499624	1.38739	0	0	2007	shallow	2	b	granito	1.85178	30.341	1	0.0157	6.0669	0.090058	e	1.31111
566	maldiventre	440962	4.4274e+06	4	0	0.0805905	1.85182	0.499624	1.38739	0	0	2007	shallow	2	b	granito	1.85178	30.341	1	0.0157	6.0669	0.090058	f	1.28889
567	maldiventre	440962	4.4274e+06	4	0	0.0805905	1.85182	0.499624	1.38739	0	0	2007	shallow	2	b	granito	1.85178	30.341	1	0.0157	6.0669	0.090058	g	0.288889
568	maldiventre	440962	4.4274e+06	4	0	0.0805905	1.85182	0.499624	1.38739	0	0	2007	shallow	2	b	granito	1.85178	30.341	1	0.0157	6.0669	0.090058	tot	3.61
569	maldiventre	439559	4.42583e+06	4	0	0.0805905	1.85182	0.499624	1.38739	0	0	2007	deep	3	b	granito	1.85178	30.341	1	0.0157	6.0669	0.112368	a	0.155556
570	maldiventre	439559	4.42583e+06	4	0	0.0805905	1.85182	0.499624	1.38739	0	0	2007	deep	3	b	granito	1.85178	30.341	1	0.0157	6.0669	0.112368	b	0.577778
571	maldiventre	439559	4.42583e+06	4	0	0.0805905	1.85182	0.499624	1.38739	0	0	2007	deep	3	b	granito	1.85178	30.341	1	0.0157	6.0669	0.112368	c	0.555556
572	maldiventre	439559	4.42583e+06	4	0	0.0805905	1.85182	0.499624	1.38739	0	0	2007	deep	3	b	granito	1.85178	30.341	1	0.0157	6.0669	0.112368	d	0.577778
573	maldiventre	439559	4.42583e+06	4	0	0.0805905	1.85182	0.499624	1.38739	0	0	2007	deep	3	b	granito	1.85178	30.341	1	0.0157	6.0669	0.112368	e	0.755556
574	maldiventre	439559	4.42583e+06	4	0	0.0805905	1.85182	0.499624	1.38739	0	0	2007	deep	3	b	granito	1.85178	30.341	1	0.0157	6.0669	0.112368	f	1.04444
575	maldiventre	439559	4.42583e+06	4	0	0.0805905	1.85182	0.499624	1.38739	0	0	2007	deep	3	b	granito	1.85178	30.341	1	0.0157	6.0669	0.112368	g	0.444444
576	maldiventre	439559	4.42583e+06	4	0	0.0805905	1.85182	0.499624	1.38739	0	0	2007	deep	3	b	granito	1.85178	30.341	1	0.0157	6.0669	0.112368	tot	2.83
577	maldiventre	440438	4.42442e+06	4	0	0.0805905	1.85182	0.499624	1.38739	0	0	2007	deep	4	b	granito	1.85178	30.341	1	0.0157	6.0669	0.078624	a	0.311111
578	maldiventre	440438	4.42442e+06	4	0	0.0805905	1.85182	0.499624	1.38739	0	0	2007	deep	4	b	granito	1.85178	30.341	1	0.0157	6.0669	0.078624	b	2.71111
579	maldiventre	440438	4.42442e+06	4	0	0.0805905	1.85182	0.499624	1.38739	0	0	2007	deep	4	b	granito	1.85178	30.341	1	0.0157	6.0669	0.078624	c	3.46667
580	maldiventre	440438	4.42442e+06	4	0	0.0805905	1.85182	0.499624	1.38739	0	0	2007	deep	4	b	granito	1.85178	30.341	1	0.0157	6.0669	0.078624	d	0.533333
581	maldiventre	440438	4.42442e+06	4	0	0.0805905	1.85182	0.499624	1.38739	0	0	2007	deep	4	b	granito	1.85178	30.341	1	0.0157	6.0669	0.078624	e	1
582	maldiventre	440438	4.42442e+06	4	0	0.0805905	1.85182	0.499624	1.38739	0	0	2007	deep	4	b	granito	1.85178	30.341	1	0.0157	6.0669	0.078624	f	1.04444
583	maldiventre	440438	4.42442e+06	4	0	0.0805905	1.85182	0.499624	1.38739	0	0	2007	deep	4	b	granito	1.85178	30.341	1	0.0157	6.0669	0.078624	g	0.511111
584	maldiventre	440438	4.42442e+06	4	0	0.0805905	1.85182	0.499624	1.38739	0	0	2007	deep	4	b	granito	1.85178	30.341	1	0.0157	6.0669	0.078624	tot	10.57
585	catalano	437952	4.41494e+06	4	0	0.0805905	1.85182	0.499624	1.38739	0	0	2005	deep	3	a	basalto	0.080576	1.725	1	0.0157	1.7007	0.0980395	a	0.33
586	catalano	437952	4.41494e+06	4	0	0.0805905	1.85182	0.499624	1.38739	0	0	2005	deep	3	a	basalto	0.080576	1.725	1	0.0157	1.7007	0.0980395	b	0.47
587	catalano	437952	4.41494e+06	4	0	0.0805905	1.85182	0.499624	1.38739	0	0	2005	deep	3	a	basalto	0.080576	1.725	1	0.0157	1.7007	0.0980395	c	0.13
588	catalano	437952	4.41494e+06	4	0	0.0805905	1.85182	0.499624	1.38739	0	0	2005	deep	3	a	basalto	0.080576	1.725	1	0.0157	1.7007	0.0980395	d	0
589	catalano	437952	4.41494e+06	4	0	0.0805905	1.85182	0.499624	1.38739	0	0	2005	deep	3	a	basalto	0.080576	1.725	1	0.0157	1.7007	0.0980395	e	0
590	catalano	437952	4.41494e+06	4	0	0.0805905	1.85182	0.499624	1.38739	0	0	2005	deep	3	a	basalto	0.080576	1.725	1	0.0157	1.7007	0.0980395	f	0
591	catalano	437952	4.41494e+06	4	0	0.0805905	1.85182	0.499624	1.38739	0	0	2005	deep	3	a	basalto	0.080576	1.725	1	0.0157	1.7007	0.0980395	g	0
592	catalano	437952	4.41494e+06	4	0	0.0805905	1.85182	0.499624	1.38739	0	0	2005	deep	3	a	basalto	0.080576	1.725	1	0.0157	1.7007	0.0980395	tot	1.63
593	catalano	438174	4.41486e+06	4	0	0.0805905	1.85182	0.499624	1.38739	0	0	2005	deep	1	a	basalto	0.080576	1.725	1	0.0157	1.7007	0.0897135	a	3.67
594	catalano	438174	4.41486e+06	4	0	0.0805905	1.85182	0.499624	1.38739	0	0	2005	deep	1	a	basalto	0.080576	1.725	1	0.0157	1.7007	0.0897135	b	2.67
595	catalano	438174	4.41486e+06	4	0	0.0805905	1.85182	0.499624	1.38739	0	0	2005	deep	1	a	basalto	0.080576	1.725	1	0.0157	1.7007	0.0897135	c	0.13
596	catalano	438174	4.41486e+06	4	0	0.0805905	1.85182	0.499624	1.38739	0	0	2005	deep	1	a	basalto	0.080576	1.725	1	0.0157	1.7007	0.0897135	d	0.133333
597	catalano	438174	4.41486e+06	4	0	0.0805905	1.85182	0.499624	1.38739	0	0	2005	deep	1	a	basalto	0.080576	1.725	1	0.0157	1.7007	0.0897135	e	0.4
598	catalano	438174	4.41486e+06	4	0	0.0805905	1.85182	0.499624	1.38739	0	0	2005	deep	1	a	basalto	0.080576	1.725	1	0.0157	1.7007	0.0897135	f	0.866667
599	catalano	438174	4.41486e+06	4	0	0.0805905	1.85182	0.499624	1.38739	0	0	2005	deep	1	a	basalto	0.080576	1.725	1	0.0157	1.7007	0.0897135	g	0.533333
600	catalano	438174	4.41486e+06	4	0	0.0805905	1.85182	0.499624	1.38739	0	0	2005	deep	1	a	basalto	0.080576	1.725	1	0.0157	1.7007	0.0897135	tot	6.47
601	catalano	438013	4.41472e+06	4	0	0.0805905	1.85182	0.499624	1.38739	0	0	2005	deep	2	a	basalto	0.080576	1.725	1	0.0157	1.7007	0.0968885	a	0.53
602	catalano	438013	4.41472e+06	4	0	0.0805905	1.85182	0.499624	1.38739	0	0	2005	deep	2	a	basalto	0.080576	1.725	1	0.0157	1.7007	0.0968885	b	0.4
603	catalano	438013	4.41472e+06	4	0	0.0805905	1.85182	0.499624	1.38739	0	0	2005	deep	2	a	basalto	0.080576	1.725	1	0.0157	1.7007	0.0968885	c	0.2
604	catalano	438013	4.41472e+06	4	0	0.0805905	1.85182	0.499624	1.38739	0	0	2005	deep	2	a	basalto	0.080576	1.725	1	0.0157	1.7007	0.0968885	d	0.2
605	catalano	438013	4.41472e+06	4	0	0.0805905	1.85182	0.499624	1.38739	0	0	2005	deep	2	a	basalto	0.080576	1.725	1	0.0157	1.7007	0.0968885	e	0.0666667
606	catalano	438013	4.41472e+06	4	0	0.0805905	1.85182	0.499624	1.38739	0	0	2005	deep	2	a	basalto	0.080576	1.725	1	0.0157	1.7007	0.0968885	f	0.666667
607	catalano	438013	4.41472e+06	4	0	0.0805905	1.85182	0.499624	1.38739	0	0	2005	deep	2	a	basalto	0.080576	1.725	1	0.0157	1.7007	0.0968885	g	0.466667
608	catalano	438013	4.41472e+06	4	0	0.0805905	1.85182	0.499624	1.38739	0	0	2005	deep	2	a	basalto	0.080576	1.725	1	0.0157	1.7007	0.0968885	tot	2.1
609	tharros	452266	4.41368e+06	5	0.0336781	0	0	0.0277146	11.0895	0.0914691	0.725147	2003	deep	1	c	posimatsabbia	14.472	30.465	4	0.1539	5.0307	0.0693175	a	0
610	tharros	452266	4.41368e+06	5	0.0336781	0	0	0.0277146	11.0895	0.0914691	0.725147	2003	deep	1	c	posimatsabbia	14.472	30.465	4	0.1539	5.0307	0.0693175	b	0
611	tharros	452266	4.41368e+06	5	0.0336781	0	0	0.0277146	11.0895	0.0914691	0.725147	2003	deep	1	c	posimatsabbia	14.472	30.465	4	0.1539	5.0307	0.0693175	c	0.85
612	tharros	452266	4.41368e+06	5	0.0336781	0	0	0.0277146	11.0895	0.0914691	0.725147	2003	deep	1	c	posimatsabbia	14.472	30.465	4	0.1539	5.0307	0.0693175	d	0.3
613	tharros	452266	4.41368e+06	5	0.0336781	0	0	0.0277146	11.0895	0.0914691	0.725147	2003	deep	1	c	posimatsabbia	14.472	30.465	4	0.1539	5.0307	0.0693175	e	1.13333
614	tharros	452266	4.41368e+06	5	0.0336781	0	0	0.0277146	11.0895	0.0914691	0.725147	2003	deep	1	c	posimatsabbia	14.472	30.465	4	0.1539	5.0307	0.0693175	f	0.0666667
615	tharros	452266	4.41368e+06	5	0.0336781	0	0	0.0277146	11.0895	0.0914691	0.725147	2003	deep	1	c	posimatsabbia	14.472	30.465	4	0.1539	5.0307	0.0693175	g	0
616	tharros	452266	4.41368e+06	5	0.0336781	0	0	0.0277146	11.0895	0.0914691	0.725147	2003	deep	1	c	posimatsabbia	14.472	30.465	4	0.1539	5.0307	0.0693175	tot	4
617	tharros	452279	4.41375e+06	5	0.0336781	0	0	0.0277146	11.0895	0.0914691	0.725147	2007	deep	1	c	posimatsabbia	14.472	30.465	4	0.1539	5.0307	0.0786363	a	0
618	tharros	452279	4.41375e+06	5	0.0336781	0	0	0.0277146	11.0895	0.0914691	0.725147	2007	deep	1	c	posimatsabbia	14.472	30.465	4	0.1539	5.0307	0.0786363	b	0
619	tharros	452279	4.41375e+06	5	0.0336781	0	0	0.0277146	11.0895	0.0914691	0.725147	2007	deep	1	c	posimatsabbia	14.472	30.465	4	0.1539	5.0307	0.0786363	c	0.04
620	tharros	452279	4.41375e+06	5	0.0336781	0	0	0.0277146	11.0895	0.0914691	0.725147	2007	deep	1	c	posimatsabbia	14.472	30.465	4	0.1539	5.0307	0.0786363	d	1.15556
621	tharros	452279	4.41375e+06	5	0.0336781	0	0	0.0277146	11.0895	0.0914691	0.725147	2007	deep	1	c	posimatsabbia	14.472	30.465	4	0.1539	5.0307	0.0786363	e	1
622	tharros	452279	4.41375e+06	5	0.0336781	0	0	0.0277146	11.0895	0.0914691	0.725147	2007	deep	1	c	posimatsabbia	14.472	30.465	4	0.1539	5.0307	0.0786363	f	0.0222222
623	tharros	452279	4.41375e+06	5	0.0336781	0	0	0.0277146	11.0895	0.0914691	0.725147	2007	deep	1	c	posimatsabbia	14.472	30.465	4	0.1539	5.0307	0.0786363	g	0
624	tharros	452279	4.41375e+06	5	0.0336781	0	0	0.0277146	11.0895	0.0914691	0.725147	2007	deep	1	c	posimatsabbia	14.472	30.465	4	0.1539	5.0307	0.0786363	tot	1.19
625	tharros	453323	4.41542e+06	5	0.0336781	0	0	0.0277146	11.0895	0.0914691	0.725147	2007	deep	1	c	posimatsabbia	14.472	30.465	4	0.1539	5.0307	0.0686723	a	0
626	tharros	453323	4.41542e+06	5	0.0336781	0	0	0.0277146	11.0895	0.0914691	0.725147	2007	deep	1	c	posimatsabbia	14.472	30.465	4	0.1539	5.0307	0.0686723	b	0
627	tharros	453323	4.41542e+06	5	0.0336781	0	0	0.0277146	11.0895	0.0914691	0.725147	2007	deep	1	c	posimatsabbia	14.472	30.465	4	0.1539	5.0307	0.0686723	c	0.04
628	tharros	453323	4.41542e+06	5	0.0336781	0	0	0.0277146	11.0895	0.0914691	0.725147	2007	deep	1	c	posimatsabbia	14.472	30.465	4	0.1539	5.0307	0.0686723	d	0.133333
629	tharros	453323	4.41542e+06	5	0.0336781	0	0	0.0277146	11.0895	0.0914691	0.725147	2007	deep	1	c	posimatsabbia	14.472	30.465	4	0.1539	5.0307	0.0686723	e	1.13333
630	tharros	453323	4.41542e+06	5	0.0336781	0	0	0.0277146	11.0895	0.0914691	0.725147	2007	deep	1	c	posimatsabbia	14.472	30.465	4	0.1539	5.0307	0.0686723	f	1.6
631	tharros	453323	4.41542e+06	5	0.0336781	0	0	0.0277146	11.0895	0.0914691	0.725147	2007	deep	1	c	posimatsabbia	14.472	30.465	4	0.1539	5.0307	0.0686723	g	0.0666667
632	tharros	453323	4.41542e+06	5	0.0336781	0	0	0.0277146	11.0895	0.0914691	0.725147	2007	deep	1	c	posimatsabbia	14.472	30.465	4	0.1539	5.0307	0.0686723	tot	0.78

## Sheet: fragstats
fragstat results landascape parameters
habitat scale
Sector	TYPE of habitat	NP	AREA_MN (ettari)	AREA_MN (Kmsq)	AREA_TOT (KMsq)	LPI	PD	SHAPE_MN	LSI	CLUMPY	PLADJ	IJI	COHESION	DIVISION	MESH	SPLIT	NLSI	FRAC	AI
1	Posidonia_su_roccia	10	71.8743	0.718743	7.18737	5.3428	0.1608	3.3681	11.5144	0.9911	99.141	55.289	99.9221	0.9949	31.9465	194.706	0.0078	1.1882	99.215			Subarea	scale	tipo	NP	AREA_MN (km)	AREA TOT Km)	LPI	LSI	PD	FRAC	IJI	AI	MESH	SPLIT	I
1	Calcari	63	7.1582	0.071582	4.52149	2.9855	1.0128	1.8591	15.6728	0.9851	98.5237	68.5519	99.8493	0.9986	8.6148	722.038	0.0138	1.1318	98.6166			1	habitat	patchy meadow	10	0.718743	7.18737	5.3428	11.5144	0.1608	1.1882	55.289	99.215	31.9465	194.706	0.9949
1	Sabbie_Fini	16	6.2352	0.062352	0.997691	0.3916	0.2572	2.4267	9.3914	0.9829	98.1191	96.9432	99.4551	1	0.2431	25587.4	0.0168	1.1616	98.316			1	habitat	calcareous	63	0.071582	4.52149	2.9855	15.6728	1.0128	1.1318	68.5519	98.6166	8.6148	722.038	0.9986
2	Posidonia_su_roccia	1	228.396	2.28396	2.28423	17.8137	0.078	6.08	6.08	0.9918	99.195	46.3349	99.9566	0.9683	40.6858	31.5132	0.0067	1.2466	99.3265			1	habitat	sand	16	0.062352	0.997691	0.3916	9.3914	0.2572	1.1616	96.9432	98.316	0.2431	25587.4	1
2	Calcari	8	31.2788	0.312788	2.5482	16.9735	0.624	2.5216	8.2977	0.9885	98.9508	98.9224	99.9395	0.9705	37.7602	33.9547	0.0092	1.2043	99.0761			1	landscape	total	89	0.284226	12.7066	5.3428	4.8105	0.0482	1.1435	69.6556	98.9318	40.8044	152.439	0.9934
2	Sabbie_Fini	10	2.6096	0.026096	0.260907	0.8864	0.7799	3.3281	9.726	0.965	96.1909	53.5664	99.0198	0.9999	0.1338	9585.08	0.0343	1.2393	96.5691								11.7089
3	Calcari	6	17.1859	0.171859	1.03153	4.5165	0.3191	3.1243	6.6939	0.9881	98.6809	44.6038	99.7983	0.9979	3.8959	482.601	0.0112	1.2068	98.8757			2	habitat	patchy meadow	1	2.28396	2.28423	17.8137	6.08	0.078	1.2466	46.3349	99.3265	40.6858	31.5132	0.9683
3	Sabbie_Fini	6	20.0201	0.200201	1.20149	6.1537	0.3191	2.7403	5.3312	0.9915	99.0271	54.4816	99.8695	0.9962	7.124	263.916	0.0079	1.1922	99.2082			2	habitat	calcareous	8	0.312788	2.5482	16.9735	8.2977	0.624	1.2043	98.9224	99.0761	37.7602	33.9547	0.9705
3	Posidonia_su_roccia	6	33.1817	0.331817	1.99134	8.1987	0.3191	2.4148	5.7066	0.9925	99.1911	61.6495	99.9037	0.9927	13.6466	137.774	0.0067	1.148	99.3319			2	habitat	sand	10	0.026096	0.260907	0.8864	9.726	0.7799	1.2393	53.5664	96.5691	0.1338	9585.08	0.9999
3	Posidonia_matte_sabbia	3	0.4644	0.004644	0.0139832	0.0649	0.1596	1.3328	1.958	0.9833	96.6552	39.5005	97.7244	1	0.0008	2.34928e+06	0.0166	1.0811	98.335			2	landscape	totale	19	0.874281	5.09334	17.8137	4.4009	0.234	1.2249	78.8702	99.0598	78.5798	16.3164	0.9387
3	Basalti	1	11.0476	0.110476	0.111421	0.5876	0.0532	3.4565	3.4565	0.985	97.9163	33.9235	99.4937	1	0.0649	28963.3	0.0149	1.2139	98.5102								4.83244
3	Cymodocea	3	0.0551	0.000551	0.0016374	0.0087	0.1596	1.2541	1.7073	0.9631	91.5254	0	94.5581	1	0	1.32712e+08	0.0369	1.1559	96.3057			3	habitat	calcareous	6	0.171859	1.03153	4.5165	6.6939	0.3191	1.2068	44.6038	98.8757	3.8959	482.601	0.9979
4	Posidonia_su_roccia	2	24.9638	0.249638	0.499624	0.4469	0.0314	4.6161	6.5799	0.984	98.1365	0	99.7065	1	0.1996	31892.1	0.0158	1.2447	98.4152			3	habitat	sand	6	0.200201	1.20149	6.1537	5.3312	0.3191	1.1922	54.4816	99.2082	7.124	263.916	0.9962
4	Granito	1	185.178	1.85178	1.85182	2.9089	0.0157	6.0669	6.0669	0.9923	99.1082	62.7449	99.9553	0.9992	5.3867	1181.78	0.0075	1.2499	99.2541			3	habitat	patchy meadow	6	0.331817	1.99134	8.1987	5.7066	0.3191	1.148	61.6495	99.3319	13.6466	137.774	0.9927
4	Posidonia_matte_sabbia	2	69.3696	0.693696	1.38739	2.1794	0.0314	2.6044	4.2105	0.9944	99.285	0	99.9324	0.9995	3.0237	2105.33	0.0055	1.1016	99.4539			3	habitat	continuous meadow	3	0.004644	0.0139832	0.0649	1.958	0.1596	1.0811	39.5005	98.335	0.0008	2.34928e+06	1
4	Basalti	1	8.0576	0.080576	0.0805905	0.1266	0.0157	1.7007	1.7007	0.995	98.8011	0	99.3972	1	0.0102	624171	0.005	1.0941	99.5025			3	habitat	basalt	1	0.110476	0.111421	0.5876	3.4565	0.0532	1.2139	33.9235	98.5102	0.0649	28963.3	1
5	Sabbie_Fini	21	3.4415	0.034415	0.725147	0.6297	0.8079	2.9693	13.3619	0.97	96.8533	56.5667	99.3253	0.9999	0.2985	8708.15	0.0292	1.2307	97.0819			3	habitat	other	3	0.000551	0.0016374	0.0087	1.7073	0.1596	1.1559	0	96.3057	0	1.32712e+08	1
5	Posidonia_matte_sabbia	3	369.56	3.6956	11.0895	42.6374	0.1154	2.2527	2.5793	0.9983	99.8451	5.5135	99.9965	0.8182	472.565	5.5007	0.0009	1.1765	99.9051			3	landscape	totale	25	0.136591	4.35141	8.1987	2.8912	0.3191	1.1683	52.9226	99.1644	24.7322	76.0202	0.9868
5	Calcari	13	0.2458	0.002458	0.0336781	0.0676	0.5001	2.1021	6.3073	0.9398	92.934	34.0519	97.1597	1	0.0014	1.85841e+06	0.0601	1.2084	93.987								3.14827
5	Cymodocea	6	1.5251	0.015251	0.0914691	0.2089	0.2308	2.422	5.7591	0.9682	96.1861	3.1504	98.9659	1	0.0154	169322	0.0317	1.1976	96.8274			4	habitat	patchy meadow	2	0.249638	0.499624	0.4469	6.5799	0.0314	1.2447	0	98.4152	0.1996	31892.1	1
5	Posidonia_su_roccia	2	1.385	0.01385	0.0277146	0.0928	0.0769	1.5269	2.0958	0.9866	97.4729	76.3556	98.5617	1	0.0023	1.13643e+06	0.0134	1.0891	98.6626			4	habitat	granite	1	1.85178	1.85182	2.9089	6.0669	0.0157	1.2499	62.7449	99.2541	5.3867	1181.78	0.9992
																						4	habitat	continuous meadow	2	0.693696	1.38739	2.1794	4.2105	0.0314	1.1016	0	99.4539	3.0237	2105.33	0.9995
																											3.73883
																						5	habitat	sand	21	0.034415	0.725147	0.6297	13.3619	0.8079	1.2307	56.5667	97.0819	0.2985	8708.15	0.9999
landscape scale																						5	habitat	continuous meadow	3	3.6956	11.0895	42.6374	2.5793	0.1154	1.1765	5.5135	99.9051	472.565	5.5007	0.8182
sector	NP	LPI	LSI	AREA_MN (ettari)	AREA_MN (Km)	AREA_TOT(KMsq)	AREA_suit(KMsq)	SHAPE_MN	FRAC_MN	CONTAG	IJI	MESH	SPLIT	PRD	AI	I						5	habitat	other	6	0.015251	0.0914691	0.2089	5.7591	0.2308	1.1976	3.1504	96.8274	0.0154	169322	1
1	89	5.3428	4.8105	14.2637	0.284226	12.7066	11.7089	2.1307	1.1435	56.9036	69.6556	40.8044	152.439	0.0482	98.9318	0.9934						5	landscape	totale	45	1.24842	26.5793	42.6374	2.7029	0.1923	1.2099	38.6258	99.6922	472.883	5.497	0.8181
2	19	17.8137	4.4009	26.5643	0.874281	5.09334	4.83244	3.1334	1.2249	58.5725	78.8702	78.5798	16.3164	0.234	99.0598	0.9387											37.7602
3	25	8.1987	2.8912	17.3973	0.136591	4.35141	3.14827	2.4357	1.1683	65.9827	52.9226	24.7322	76.0202	0.3191	99.1644	0.9868
4	6	2.9089	1.9485	63.6504	0.718923	3.81942	3.81942	3.7014	1.1728	60.0697	38.4719	8.6202	738.484	0.0628	99.2223	0.9986
5	45	42.6374	2.7029	26.5793	0.752315	26.5793	11.2423	2.5339	1.2099	89.8961	38.6258	472.883	5.497	0.1923	99.6922	0.8181
Habitat	Type(Frag.)
Sabbie_Fini	cls_1
Posidonia_su_roccia	cls_2
Calcari	cls_3
Posidonia_matte_sabbia	cls_4
Cymodocea	cls_5
Basalti	cls_6
Granito	cls_7

## Sheet: tabglm
id	site	sector	habitat	area	perimeter	Partio	NP	PD	MPS	LPI	IJI	labrids	sparids	totpred	curspeed	class	den	den1
1	a_scaesali	1	calcari	1.079	22.092	20.4745	63	1.0128	0.07	2.99	68.55	68.8333	24.8333	93.6667	0.075871	a	5.2	5.2
2	a_scaesali	1	calcari	1.079	22.092	20.4745	63	1.0128	0.07	2.99	68.55	68.8333	24.8333	93.6667	0.075871	b	1.93	1.93
3	a_scaesali	1	calcari	1.079	22.092	20.4745	63	1.0128	0.07	2.99	68.55	68.8333	24.8333	93.6667	0.075871	c	2.73	2.73
4	a_scaesali	1	calcari	1.079	22.092	20.4745	63	1.0128	0.07	2.99	68.55	68.8333	24.8333	93.6667	0.075871	d	2.4	2.4
5	a_scaesali	1	calcari	1.079	22.092	20.4745	63	1.0128	0.07	2.99	68.55	68.8333	24.8333	93.6667	0.075871	e	1.86667	1.86667
6	a_scaesali	1	calcari	1.079	22.092	20.4745	63	1.0128	0.07	2.99	68.55	68.8333	24.8333	93.6667	0.075871	f	1	1
7	a_scaesali	1	calcari	1.079	22.092	20.4745	63	1.0128	0.07	2.99	68.55	68.8333	24.8333	93.6667	0.075871	g	0	0
8	a_scaesali	1	calcari	1.079	22.092	20.4745	63	1.0128	0.07	2.99	68.55	68.8333	24.8333	93.6667	0.075871	rec	7.13	7.13
9	a_scaesali	1	calcari	1.079	22.092	20.4745	63	1.0128	0.07	2.99	68.55	68.8333	24.8333	93.6667	0.075871	young	6.99667	6.99667
10	a_scaesali	1	calcari	1.079	22.092	20.4745	63	1.0128	0.07	2.99	68.55	68.8333	24.8333	93.6667	0.075871	undersize	14.1267	14.1267
11	a_scaesali	1	calcari	1.079	22.092	20.4745	63	1.0128	0.07	2.99	68.55	68.8333	24.8333	93.6667	0.075871	stock	1	1
12	a_scaesali	1	calcari	1.079	22.092	20.4745	63	1.0128	0.07	2.99	68.55	68.8333	24.8333	93.6667	0.075871	fertile	5.26667	5.26667
13	a_scaesali	1	calcari	1.079	22.092	20.4745	63	1.0128	0.07	2.99	68.55	68.8333	24.8333	93.6667	0.075871	tot	15.1267	15.1267
14	a_scaesali	1	calcari	1.079	22.092	20.4745	63	1.0128	0.07	2.99	68.55	68.8333	24.8333	93.6667	0.075871	stockper	6.61084	6.61084
15	a_scaesali	1	calcari	1.079	22.092	20.4745	63	1.0128	0.07	2.99	68.55	61	8.66667	69.6667	0.0721208	a	2.47	2.47
16	a_scaesali	1	calcari	1.079	22.092	20.4745	63	1.0128	0.07	2.99	68.55	61	8.66667	69.6667	0.0721208	b	3.4	3.4
17	a_scaesali	1	calcari	1.079	22.092	20.4745	63	1.0128	0.07	2.99	68.55	61	8.66667	69.6667	0.0721208	c	3.47	3.47
18	a_scaesali	1	calcari	1.079	22.092	20.4745	63	1.0128	0.07	2.99	68.55	61	8.66667	69.6667	0.0721208	d	2.6	2.6
19	a_scaesali	1	calcari	1.079	22.092	20.4745	63	1.0128	0.07	2.99	68.55	61	8.66667	69.6667	0.0721208	e	2.53333	2.53333
20	a_scaesali	1	calcari	1.079	22.092	20.4745	63	1.0128	0.07	2.99	68.55	61	8.66667	69.6667	0.0721208	f	0.733333	0.733333
21	a_scaesali	1	calcari	1.079	22.092	20.4745	63	1.0128	0.07	2.99	68.55	61	8.66667	69.6667	0.0721208	g	0	0
22	a_scaesali	1	calcari	1.079	22.092	20.4745	63	1.0128	0.07	2.99	68.55	61	8.66667	69.6667	0.0721208	rec	5.87	5.87
23	a_scaesali	1	calcari	1.079	22.092	20.4745	63	1.0128	0.07	2.99	68.55	61	8.66667	69.6667	0.0721208	young	8.60333	8.60333
24	a_scaesali	1	calcari	1.079	22.092	20.4745	63	1.0128	0.07	2.99	68.55	61	8.66667	69.6667	0.0721208	undersize	14.4733	14.4733
25	a_scaesali	1	calcari	1.079	22.092	20.4745	63	1.0128	0.07	2.99	68.55	61	8.66667	69.6667	0.0721208	stock	0.733333	0.733333
26	a_scaesali	1	calcari	1.079	22.092	20.4745	63	1.0128	0.07	2.99	68.55	61	8.66667	69.6667	0.0721208	fertile	5.86667	5.86667
27	a_scaesali	1	calcari	1.079	22.092	20.4745	63	1.0128	0.07	2.99	68.55	61	8.66667	69.6667	0.0721208	tot	15.2067	15.2067
28	a_scaesali	1	calcari	1.079	22.092	20.4745	63	1.0128	0.07	2.99	68.55	61	8.66667	69.6667	0.0721208	stockper	4.82245	4.82245
29	a_scaesali	1	calcari	1.079	22.092	20.4745	63	1.0128	0.07	2.99	68.55	83	24.1667	107.167	0.0510989	a	1.47	1.47
30	a_scaesali	1	calcari	1.079	22.092	20.4745	63	1.0128	0.07	2.99	68.55	83	24.1667	107.167	0.0510989	b	1.6	1.6
31	a_scaesali	1	calcari	1.079	22.092	20.4745	63	1.0128	0.07	2.99	68.55	83	24.1667	107.167	0.0510989	c	1.47	1.47
32	a_scaesali	1	calcari	1.079	22.092	20.4745	63	1.0128	0.07	2.99	68.55	83	24.1667	107.167	0.0510989	d	1.46667	1.46667
33	a_scaesali	1	calcari	1.079	22.092	20.4745	63	1.0128	0.07	2.99	68.55	83	24.1667	107.167	0.0510989	e	0.866667	0.866667
34	a_scaesali	1	calcari	1.079	22.092	20.4745	63	1.0128	0.07	2.99	68.55	83	24.1667	107.167	0.0510989	f	1.06667	1.06667
35	a_scaesali	1	calcari	1.079	22.092	20.4745	63	1.0128	0.07	2.99	68.55	83	24.1667	107.167	0.0510989	g	0.0666667	0.0666667
36	a_scaesali	1	calcari	1.079	22.092	20.4745	63	1.0128	0.07	2.99	68.55	83	24.1667	107.167	0.0510989	rec	3.07	3.07
37	a_scaesali	1	calcari	1.079	22.092	20.4745	63	1.0128	0.07	2.99	68.55	83	24.1667	107.167	0.0510989	young	3.80333	3.80333
38	a_scaesali	1	calcari	1.079	22.092	20.4745	63	1.0128	0.07	2.99	68.55	83	24.1667	107.167	0.0510989	undersize	6.87333	6.87333
39	a_scaesali	1	calcari	1.079	22.092	20.4745	63	1.0128	0.07	2.99	68.55	83	24.1667	107.167	0.0510989	stock	1.13333	1.13333
40	a_scaesali	1	calcari	1.079	22.092	20.4745	63	1.0128	0.07	2.99	68.55	20.6667	38.8333	59.5	0.0510989	fertile	3.46667	3.46667
41	a_scaesali	1	calcari	1.079	22.092	20.4745	63	1.0128	0.07	2.99	68.55	20.6667	38.8333	59.5	0.0510989	tot	8.00667	8.00667
42	a_scaesali	1	calcari	1.079	22.092	20.4745	63	1.0128	0.07	2.99	68.55	20.6667	38.8333	59.5	0.0510989	stockper	14.1549	14.1549
43	a_scaesali	1	posiroccia	3.817	46.926	12.2939	10	0.1608	0.72	5.34	55.29	20.6667	38.8333	59.5	0.0461604	a	0	0
44	a_scaesali	1	posiroccia	3.817	46.926	12.2939	10	0.1608	0.72	5.34	55.29	20.6667	38.8333	59.5	0.0461604	b	0	0
45	a_scaesali	1	posiroccia	3.817	46.926	12.2939	10	0.1608	0.72	5.34	55.29	20.6667	38.8333	59.5	0.0461604	c	0.07	0.07
46	a_scaesali	1	posiroccia	3.817	46.926	12.2939	10	0.1608	0.72	5.34	55.29	20.6667	38.8333	59.5	0.0461604	d	0.133333	0.133333
47	a_scaesali	1	posiroccia	3.817	46.926	12.2939	10	0.1608	0.72	5.34	55.29	20.6667	38.8333	59.5	0.0461604	e	0.8	0.8
48	a_scaesali	1	posiroccia	3.817	46.926	12.2939	10	0.1608	0.72	5.34	55.29	20.6667	38.8333	59.5	0.0461604	f	0.0666667	0.0666667
49	a_scaesali	1	posiroccia	3.817	46.926	12.2939	10	0.1608	0.72	5.34	55.29	20.6667	38.8333	59.5	0.0461604	g	0	0
50	a_scaesali	1	posiroccia	3.817	46.926	12.2939	10	0.1608	0.72	5.34	55.29	20.6667	38.8333	59.5	0.0461604	rec	0	0
51	a_scaesali	1	posiroccia	3.817	46.926	12.2939	10	0.1608	0.72	5.34	55.29	20.6667	38.8333	59.5	0.0461604	young	1.00333	1.00333
52	a_scaesali	1	posiroccia	3.817	46.926	12.2939	10	0.1608	0.72	5.34	55.29	20.6667	38.8333	59.5	0.0461604	undersize	1.00333	1.00333
53	a_scaesali	1	posiroccia	3.817	46.926	12.2939	10	0.1608	0.72	5.34	55.29	23.5	17.6667	41.1667	0.0461604	stock	0.0666667	0.0666667
54	a_scaesali	1	posiroccia	3.817	46.926	12.2939	10	0.1608	0.72	5.34	55.29	23.5	17.6667	41.1667	0.0461604	fertile	1	1
55	a_scaesali	1	posiroccia	3.817	46.926	12.2939	10	0.1608	0.72	5.34	55.29	23.5	17.6667	41.1667	0.0461604	tot	1.07	1.07
56	a_scaesali	1	posiroccia	3.817	46.926	12.2939	10	0.1608	0.72	5.34	55.29	23.5	17.6667	41.1667	0.0461604	stockper	6.23053	6.23053
57	a_scaesali	1	posiroccia	3.817	46.926	12.2939	10	0.1608	0.72	5.34	55.29	23.5	17.6667	41.1667	0.0367164	a	0	0
58	a_scaesali	1	posiroccia	3.817	46.926	12.2939	10	0.1608	0.72	5.34	55.29	23.5	17.6667	41.1667	0.0367164	b	0	0
59	a_scaesali	1	posiroccia	3.817	46.926	12.2939	10	0.1608	0.72	5.34	55.29	23.5	17.6667	41.1667	0.0367164	c	0.13	0.13
60	a_scaesali	1	posiroccia	3.817	46.926	12.2939	10	0.1608	0.72	5.34	55.29	23.5	17.6667	41.1667	0.0367164	d	0.533333	0.533333
61	a_scaesali	1	posiroccia	3.817	46.926	12.2939	10	0.1608	0.72	5.34	55.29	23.5	17.6667	41.1667	0.0367164	e	2.93333	2.93333
62	a_scaesali	1	posiroccia	3.817	46.926	12.2939	10	0.1608	0.72	5.34	55.29	23.5	17.6667	41.1667	0.0367164	f	1	1
63	a_scaesali	1	posiroccia	3.817	46.926	12.2939	10	0.1608	0.72	5.34	55.29	23.5	17.6667	41.1667	0.0367164	g	0	0
64	a_scaesali	1	posiroccia	3.817	46.926	12.2939	10	0.1608	0.72	5.34	55.29	23.5	17.6667	41.1667	0.0367164	rec	0	0
65	a_scaesali	1	posiroccia	3.817	46.926	12.2939	10	0.1608	0.72	5.34	55.29	23.5	17.6667	41.1667	0.0367164	young	3.59667	3.59667
66	a_scaesali	1	posiroccia	3.817	46.926	12.2939	10	0.1608	0.72	5.34	55.29	23.5	17.6667	41.1667	0.0367164	undersize	3.59667	3.59667
67	a_scaesali	1	posiroccia	3.817	46.926	12.2939	10	0.1608	0.72	5.34	55.29	23.5	17.6667	41.1667	0.0367164	stock	1	1
68	a_scaesali	1	posiroccia	3.817	46.926	12.2939	10	0.1608	0.72	5.34	55.29	23.5	17.6667	41.1667	0.0367164	fertile	4.46667	4.46667
69	a_scaesali	1	posiroccia	3.817	46.926	12.2939	10	0.1608	0.72	5.34	55.29	23.5	17.6667	41.1667	0.0367164	tot	4.59667	4.59667
70	a_scaesali	1	posiroccia	3.817	46.926	12.2939	10	0.1608	0.72	5.34	55.29	23.5	17.6667	41.1667	0.0367164	stockper	21.7549	21.7549
71	a_scaesali	1	posiroccia	3.817	46.926	12.2939	10	0.1608	0.72	5.34	55.29	23.5	17.6667	41.1667	0.0316134	a	0	0
72	a_scaesali	1	posiroccia	3.817	46.926	12.2939	10	0.1608	0.72	5.34	55.29	23.5	17.6667	41.1667	0.0316134	b	0	0
73	a_scaesali	1	posiroccia	3.817	46.926	12.2939	10	0.1608	0.72	5.34	55.29	23.5	17.6667	41.1667	0.0316134	c	0.07	0.07
74	a_scaesali	1	posiroccia	3.817	46.926	12.2939	10	0.1608	0.72	5.34	55.29	23.5	17.6667	41.1667	0.0316134	d	0.466667	0.466667
75	a_scaesali	1	posiroccia	3.817	46.926	12.2939	10	0.1608	0.72	5.34	55.29	23.5	17.6667	41.1667	0.0316134	e	0.6	0.6
76	a_scaesali	1	posiroccia	3.817	46.926	12.2939	10	0.1608	0.72	5.34	55.29	23.5	17.6667	41.1667	0.0316134	f	0.0666667	0.0666667
77	a_scaesali	1	posiroccia	3.817	46.926	12.2939	10	0.1608	0.72	5.34	55.29	23.5	17.6667	41.1667	0.0316134	g	0.0666667	0.0666667
78	a_scaesali	1	posiroccia	3.817	46.926	12.2939	10	0.1608	0.72	5.34	55.29	23.5	17.6667	41.1667	0.0316134	rec	0	0
79	a_scaesali	1	posiroccia	3.817	46.926	12.2939	10	0.1608	0.72	5.34	55.29	23.5	17.6667	41.1667	0.0316134	young	1.13667	1.13667
80	a_scaesali	1	posiroccia	3.817	46.926	12.2939	10	0.1608	0.72	5.34	55.29	23.5	17.6667	41.1667	0.0316134	undersize	1.13667	1.13667
81	a_scaesali	1	posiroccia	3.817	46.926	12.2939	10	0.1608	0.72	5.34	55.29	23.5	17.6667	41.1667	0.0316134	stock	0.133333	0.133333
82	a_scaesali	1	posiroccia	3.817	46.926	12.2939	10	0.1608	0.72	5.34	55.29	23.5	17.6667	41.1667	0.0316134	fertile	1.2	1.2
83	a_scaesali	1	posiroccia	3.817	46.926	12.2939	10	0.1608	0.72	5.34	55.29	23.5	17.6667	41.1667	0.0316134	tot	1.27	1.27
84	a_scaesali	1	posiroccia	3.817	46.926	12.2939	10	0.1608	0.72	5.34	55.29	23.5	17.6667	41.1667	0.0316134	stockper	10.4987	10.4987
85	b_supallosu	1	calcari	2.448	50.636	20.6846	63	1.0128	0.72	5.34	55.29	123.667	2.33333	126	0.06039	a	3.87	3.87
86	b_supallosu	1	calcari	2.448	50.636	20.6846	63	1.0128	0.72	5.34	55.29	123.667	2.33333	126	0.06039	b	3.07	3.07
87	b_supallosu	1	calcari	2.448	50.636	20.6846	63	1.0128	0.72	5.34	55.29	123.667	2.33333	126	0.06039	c	2.13	2.13
88	b_supallosu	1	calcari	2.448	50.636	20.6846	63	1.0128	0.72	5.34	55.29	123.667	2.33333	126	0.06039	d	2.26667	2.26667
89	b_supallosu	1	calcari	2.448	50.636	20.6846	63	1.0128	0.72	5.34	55.29	123.667	2.33333	126	0.06039	e	1.33333	1.33333
90	b_supallosu	1	calcari	2.448	50.636	20.6846	63	1.0128	0.72	5.34	55.29	123.667	2.33333	126	0.06039	f	0.533333	0.533333
91	b_supallosu	1	calcari	2.448	50.636	20.6846	63	1.0128	0.72	5.34	55.29	123.667	2.33333	126	0.06039	g	0	0
92	b_supallosu	1	calcari	2.448	50.636	20.6846	63	1.0128	0.72	5.34	55.29	123.667	2.33333	126	0.06039	rec	6.94	6.94
93	b_supallosu	1	calcari	2.448	50.636	20.6846	63	1.0128	0.72	5.34	55.29	123.667	2.33333	126	0.06039	young	5.73	5.73
94	b_supallosu	1	calcari	2.448	50.636	20.6846	63	1.0128	0.72	5.34	55.29	123.667	2.33333	126	0.06039	undersize	12.67	12.67
95	b_supallosu	1	calcari	2.448	50.636	20.6846	63	1.0128	0.72	5.34	55.29	123.667	2.33333	126	0.06039	stock	0.533333	0.533333
96	b_supallosu	1	calcari	2.448	50.636	20.6846	63	1.0128	0.72	5.34	55.29	123.667	2.33333	126	0.06039	fertile	4.13333	4.13333
97	b_supallosu	1	calcari	2.448	50.636	20.6846	63	1.0128	0.72	5.34	55.29	123.667	2.33333	126	0.06039	tot	13.2033	13.2033
98	b_supallosu	1	calcari	2.448	50.636	20.6846	63	1.0128	0.72	5.34	55.29	123.667	2.33333	126	0.06039	stockper	4.03938	4.03938
99	b_supallosu	1	calcari	2.448	50.636	20.6846	63	1.0128	0.72	5.34	55.29	123.667	2.33333	126	0.0515759	a	1.87	1.87
100	b_supallosu	1	calcari	2.448	50.636	20.6846	63	1.0128	0.72	5.34	55.29	123.667	2.33333	126	0.0515759	b	1.87	1.87
101	b_supallosu	1	calcari	2.448	50.636	20.6846	63	1.0128	0.72	5.34	55.29	123.667	2.33333	126	0.0515759	c	2.07	2.07
102	b_supallosu	1	calcari	2.448	50.636	20.6846	63	1.0128	0.72	5.34	55.29	123.667	2.33333	126	0.0515759	d	1.4	1.4
103	b_supallosu	1	calcari	2.448	50.636	20.6846	63	1.0128	0.72	5.34	55.29	123.667	2.33333	126	0.0515759	e	3.2	3.2
104	b_supallosu	1	calcari	2.448	50.636	20.6846	63	1.0128	0.72	5.34	55.29	123.667	2.33333	126	0.0515759	f	2.46667	2.46667
105	b_supallosu	1	calcari	2.448	50.636	20.6846	63	1.0128	0.72	5.34	55.29	123.667	2.33333	126	0.0515759	g	0.266667	0.266667
106	b_supallosu	1	calcari	2.448	50.636	20.6846	63	1.0128	0.72	5.34	55.29	123.667	2.33333	126	0.0515759	rec	3.74	3.74
107	b_supallosu	1	calcari	2.448	50.636	20.6846	63	1.0128	0.72	5.34	55.29	123.667	2.33333	126	0.0515759	young	6.67	6.67
108	b_supallosu	1	calcari	2.448	50.636	20.6846	63	1.0128	0.72	5.34	55.29	123.667	2.33333	126	0.0515759	undersize	10.41	10.41
109	b_supallosu	1	calcari	2.448	50.636	20.6846	63	1.0128	0.72	5.34	55.29	123.667	2.33333	126	0.0515759	stock	2.73333	2.73333
110	b_supallosu	1	calcari	2.448	50.636	20.6846	63	1.0128	0.72	5.34	55.29	123.667	2.33333	126	0.0515759	fertile	7.33333	7.33333
111	b_supallosu	1	calcari	2.448	50.636	20.6846	63	1.0128	0.72	5.34	55.29	123.667	2.33333	126	0.0515759	tot	13.1433	13.1433
112	b_supallosu	1	calcari	2.448	50.636	20.6846	63	1.0128	0.72	5.34	55.29	123.667	2.33333	126	0.0515759	stockper	20.7963	20.7963
113	b_supallosu	1	calcari	2.448	50.636	20.6846	63	1.0128	0.72	5.34	55.29	123.667	2.33333	126	0.0446934	a	7.2	7.2
114	b_supallosu	1	calcari	2.448	50.636	20.6846	63	1.0128	0.72	5.34	55.29	123.667	2.33333	126	0.0446934	b	6.47	6.47
115	b_supallosu	1	calcari	2.448	50.636	20.6846	63	1.0128	0.72	5.34	55.29	123.667	2.33333	126	0.0446934	c	2.73	2.73
116	b_supallosu	1	calcari	2.448	50.636	20.6846	63	1.0128	0.72	5.34	55.29	123.667	2.33333	126	0.0446934	d	1.86667	1.86667
117	b_supallosu	1	calcari	2.448	50.636	20.6846	63	1.0128	0.72	5.34	55.29	123.667	2.33333	126	0.0446934	e	2.06667	2.06667
118	b_supallosu	1	calcari	2.448	50.636	20.6846	63	1.0128	0.72	5.34	55.29	123.667	2.33333	126	0.0446934	f	1.66667	1.66667
119	b_supallosu	1	calcari	2.448	50.636	20.6846	63	1.0128	0.72	5.34	55.29	123.667	2.33333	126	0.0446934	g	0	0
120	b_supallosu	1	calcari	2.448	50.636	20.6846	63	1.0128	0.72	5.34	55.29	123.667	2.33333	126	0.0446934	rec	13.67	13.67
121	b_supallosu	1	calcari	2.448	50.636	20.6846	63	1.0128	0.72	5.34	55.29	123.667	2.33333	126	0.0446934	young	6.66333	6.66333
122	b_supallosu	1	calcari	2.448	50.636	20.6846	63	1.0128	0.72	5.34	55.29	123.667	2.33333	126	0.0446934	undersize	20.3333	20.3333
123	b_supallosu	1	calcari	2.448	50.636	20.6846	63	1.0128	0.72	5.34	55.29	123.667	2.33333	126	0.0446934	stock	1.66667	1.66667
124	b_supallosu	1	calcari	2.448	50.636	20.6846	63	1.0128	0.72	5.34	55.29	123.667	2.33333	126	0.0446934	fertile	5.6	5.6
125	b_supallosu	1	calcari	2.448	50.636	20.6846	63	1.0128	0.72	5.34	55.29	123.667	2.33333	126	0.0446934	tot	22	22
126	b_supallosu	1	calcari	2.448	50.636	20.6846	63	1.0128	0.72	5.34	55.29	123.667	2.33333	126	0.0446934	stockper	7.57576	7.57576
127	b_supallosu	1	posiroccia	3.817	46.926	12.2939	10	0.1608	0.72	5.34	55.29	123.667	2.33333	126	0.0388223	a	0	0
128	b_supallosu	1	posiroccia	3.817	46.926	12.2939	10	0.1608	0.72	5.34	55.29	123.667	2.33333	126	0.0388223	b	0	0
129	b_supallosu	1	posiroccia	3.817	46.926	12.2939	10	0.1608	0.72	5.34	55.29	123.667	2.33333	126	0.0388223	c	0.07	0.07
130	b_supallosu	1	posiroccia	3.817	46.926	12.2939	10	0.1608	0.72	5.34	55.29	123.667	2.33333	126	0.0388223	d	0.2	0.2
131	b_supallosu	1	posiroccia	3.817	46.926	12.2939	10	0.1608	0.72	5.34	55.29	123.667	2.33333	126	0.0388223	e	0.733333	0.733333
132	b_supallosu	1	posiroccia	3.817	46.926	12.2939	10	0.1608	0.72	5.34	55.29	123.667	2.33333	126	0.0388223	f	0.4	0.4
133	b_supallosu	1	posiroccia	3.817	46.926	12.2939	10	0.1608	0.72	5.34	55.29	123.667	2.33333	126	0.0388223	g	0.0666667	0.0666667
134	b_supallosu	1	posiroccia	3.817	46.926	12.2939	10	0.1608	0.72	5.34	55.29	123.667	2.33333	126	0.0388223	rec	0	0
135	b_supallosu	1	posiroccia	3.817	46.926	12.2939	10	0.1608	0.72	5.34	55.29	123.667	2.33333	126	0.0388223	young	1.00333	1.00333
136	b_supallosu	1	posiroccia	3.817	46.926	12.2939	10	0.1608	0.72	5.34	55.29	123.667	2.33333	126	0.0388223	undersize	1.00333	1.00333
137	b_supallosu	1	posiroccia	3.817	46.926	12.2939	10	0.1608	0.72	5.34	55.29	123.667	2.33333	126	0.0388223	stock	0.466667	0.466667
138	b_supallosu	1	posiroccia	3.817	46.926	12.2939	10	0.1608	0.72	5.34	55.29	123.667	2.33333	126	0.0388223	fertile	1.4	1.4
139	b_supallosu	1	posiroccia	3.817	46.926	12.2939	10	0.1608	0.72	5.34	55.29	123.667	2.33333	126	0.0388223	tot	1.47	1.47
140	b_supallosu	1	posiroccia	3.817	46.926	12.2939	10	0.1608	0.72	5.34	55.29	123.667	2.33333	126	0.0388223	stockper	31.746	31.746
141	b_supallosu	1	posiroccia	3.817	46.926	12.2939	10	0.1608	0.72	5.34	55.29	123.667	2.33333	126	0.0258119	a	0	0
142	b_supallosu	1	posiroccia	3.817	46.926	12.2939	10	0.1608	0.72	5.34	55.29	123.667	2.33333	126	0.0258119	b	0	0
143	b_supallosu	1	posiroccia	3.817	46.926	12.2939	10	0.1608	0.72	5.34	55.29	123.667	2.33333	126	0.0258119	c	0.13	0.13
144	b_supallosu	1	posiroccia	3.817	46.926	12.2939	10	0.1608	0.72	5.34	55.29	123.667	2.33333	126	0.0258119	d	0.266667	0.266667
145	b_supallosu	1	posiroccia	3.817	46.926	12.2939	10	0.1608	0.72	5.34	55.29	123.667	2.33333	126	0.0258119	e	1.06667	1.06667
146	b_supallosu	1	posiroccia	3.817	46.926	12.2939	10	0.1608	0.72	5.34	55.29	123.667	2.33333	126	0.0258119	f	1.33333	1.33333
147	b_supallosu	1	posiroccia	3.817	46.926	12.2939	10	0.1608	0.72	5.34	55.29	123.667	2.33333	126	0.0258119	g	0.0666667	0.0666667
148	b_supallosu	1	posiroccia	3.817	46.926	12.2939	10	0.1608	0.72	5.34	55.29	123.667	2.33333	126	0.0258119	rec	0	0
149	b_supallosu	1	posiroccia	3.817	46.926	12.2939	10	0.1608	0.72	5.34	55.29	123.667	2.33333	126	0.0258119	young	1.46333	1.46333
150	b_supallosu	1	posiroccia	3.817	46.926	12.2939	10	0.1608	0.72	5.34	55.29	123.667	2.33333	126	0.0258119	undersize	1.46333	1.46333
151	b_supallosu	1	posiroccia	3.817	46.926	12.2939	10	0.1608	0.72	5.34	55.29	123.667	2.33333	126	0.0258119	stock	1.4	1.4
152	b_supallosu	1	posiroccia	3.817	46.926	12.2939	10	0.1608	0.72	5.34	55.29	123.667	2.33333	126	0.0258119	fertile	2.73333	2.73333
153	b_supallosu	1	posiroccia	3.817	46.926	12.2939	10	0.1608	0.72	5.34	55.29	123.667	2.33333	126	0.0258119	tot	2.86333	2.86333
154	b_supallosu	1	posiroccia	3.817	46.926	12.2939	10	0.1608	0.72	5.34	55.29	123.667	2.33333	126	0.0258119	stockper	48.8941	48.8941
155	b_supallosu	1	posiroccia	3.817	46.926	12.2939	10	0.1608	0.72	5.34	55.29	123.667	2.33333	126	0.0305721	a	0.2	0.2
156	b_supallosu	1	posiroccia	3.817	46.926	12.2939	10	0.1608	0.72	5.34	55.29	123.667	2.33333	126	0.0305721	b	0	0
157	b_supallosu	1	posiroccia	3.817	46.926	12.2939	10	0.1608	0.72	5.34	55.29	123.667	2.33333	126	0.0305721	c	0	0
158	b_supallosu	1	posiroccia	3.817	46.926	12.2939	10	0.1608	0.72	5.34	55.29	123.667	2.33333	126	0.0305721	d	0	0
159	b_supallosu	1	posiroccia	3.817	46.926	12.2939	10	0.1608	0.72	5.34	55.29	123.667	2.33333	126	0.0305721	e	0.2	0.2
160	b_supallosu	1	posiroccia	3.817	46.926	12.2939	10	0.1608	0.72	5.34	55.29	123.667	2.33333	126	0.0305721	f	0.2	0.2
161	b_supallosu	1	posiroccia	3.817	46.926	12.2939	10	0.1608	0.72	5.34	55.29	123.667	2.33333	126	0.0305721	g	0	0
162	b_supallosu	1	posiroccia	3.817	46.926	12.2939	10	0.1608	0.72	5.34	55.29	123.667	2.33333	126	0.0305721	rec	0.2	0.2
163	b_supallosu	1	posiroccia	3.817	46.926	12.2939	10	0.1608	0.72	5.34	55.29	123.667	2.33333	126	0.0305721	young	0.2	0.2
164	b_supallosu	1	posiroccia	3.817	46.926	12.2939	10	0.1608	0.72	5.34	55.29	123.667	2.33333	126	0.0305721	undersize	0.4	0.4
165	b_supallosu	1	posiroccia	3.817	46.926	12.2939	10	0.1608	0.72	5.34	55.29	123.667	2.33333	126	0.0305721	stock	0.2	0.2
166	b_supallosu	1	posiroccia	3.817	46.926	12.2939	10	0.1608	0.72	5.34	55.29	123.667	2.33333	126	0.0305721	fertile	0.4	0.4
167	b_supallosu	1	posiroccia	3.817	46.926	12.2939	10	0.1608	0.72	5.34	55.29	123.667	2.33333	126	0.0305721	tot	0.6	0.6
168	b_supallosu	1	posiroccia	3.817	46.926	12.2939	10	0.1608	0.72	5.34	55.29	123.667	2.33333	126	0.0305721	stockper	33.3333	33.3333
169	c_putzuidu	1	posiroccia	4.347	42.152	9.6968	10	0.1608	0.72	5.34	55.29	123.667	2.33333	126	0.0425656	a	0	0
170	c_putzuidu	1	posiroccia	4.347	42.152	9.6968	10	0.1608	0.72	5.34	55.29	123.667	2.33333	126	0.0425656	b	0.07	0.07
171	c_putzuidu	1	posiroccia	4.347	42.152	9.6968	10	0.1608	0.72	5.34	55.29	123.667	2.33333	126	0.0425656	c	0.07	0.07
172	c_putzuidu	1	posiroccia	4.347	42.152	9.6968	10	0.1608	0.72	5.34	55.29	123.667	2.33333	126	0.0425656	d	3.2	3.2
173	c_putzuidu	1	posiroccia	4.347	42.152	9.6968	10	0.1608	0.72	5.34	55.29	123.667	2.33333	126	0.0425656	e	1.46667	1.46667
174	c_putzuidu	1	posiroccia	4.347	42.152	9.6968	10	0.1608	0.72	5.34	55.29	123.667	2.33333	126	0.0425656	f	0.6	0.6
175	c_putzuidu	1	posiroccia	4.347	42.152	9.6968	10	0.1608	0.72	5.34	55.29	123.667	2.33333	126	0.0425656	g	0	0
176	c_putzuidu	1	posiroccia	4.347	42.152	9.6968	10	0.1608	0.72	5.34	55.29	123.667	2.33333	126	0.0425656	rec	0.07	0.07
177	c_putzuidu	1	posiroccia	4.347	42.152	9.6968	10	0.1608	0.72	5.34	55.29	123.667	2.33333	126	0.0425656	young	4.73667	4.73667
178	c_putzuidu	1	posiroccia	4.347	42.152	9.6968	10	0.1608	0.72	5.34	55.29	123.667	2.33333	126	0.0425656	undersize	4.80667	4.80667
179	c_putzuidu	1	posiroccia	4.347	42.152	9.6968	10	0.1608	0.72	5.34	55.29	123.667	2.33333	126	0.0425656	stock	0.6	0.6
180	c_putzuidu	1	posiroccia	4.347	42.152	9.6968	10	0.1608	0.72	5.34	55.29	123.667	2.33333	126	0.0425656	fertile	5.26667	5.26667
181	c_putzuidu	1	posiroccia	4.347	42.152	9.6968	10	0.1608	0.72	5.34	55.29	123.667	2.33333	126	0.0425656	tot	5.40667	5.40667
182	c_putzuidu	1	posiroccia	4.347	42.152	9.6968	10	0.1608	0.72	5.34	55.29	123.667	2.33333	126	0.0425656	stockper	11.0974	11.0974
183	c_putzuidu	1	calcari	2.448	50.636	20.6846	63	1.0128	0.72	5.34	55.29	123.667	2.33333	126	0.0577583	a	1.6	1.6
184	c_putzuidu	1	calcari	2.448	50.636	20.6846	63	1.0128	0.72	5.34	55.29	123.667	2.33333	126	0.0577583	b	4	4
185	c_putzuidu	1	calcari	2.448	50.636	20.6846	63	1.0128	0.72	5.34	55.29	123.667	2.33333	126	0.0577583	c	3.4	3.4
186	c_putzuidu	1	calcari	2.448	50.636	20.6846	63	1.0128	0.72	5.34	55.29	123.667	2.33333	126	0.0577583	d	2.2	2.2
187	c_putzuidu	1	calcari	2.448	50.636	20.6846	63	1.0128	0.72	5.34	55.29	123.667	2.33333	126	0.0577583	e	3.66667	3.66667
188	c_putzuidu	1	calcari	2.448	50.636	20.6846	63	1.0128	0.72	5.34	55.29	123.667	2.33333	126	0.0577583	f	3	3
189	c_putzuidu	1	calcari	2.448	50.636	20.6846	63	1.0128	0.72	5.34	55.29	123.667	2.33333	126	0.0577583	g	0	0
190	c_putzuidu	1	calcari	2.448	50.636	20.6846	63	1.0128	0.72	5.34	55.29	123.667	2.33333	126	0.0577583	rec	5.6	5.6
191	c_putzuidu	1	calcari	2.448	50.636	20.6846	63	1.0128	0.72	5.34	55.29	123.667	2.33333	126	0.0577583	young	9.26667	9.26667
192	c_putzuidu	1	calcari	2.448	50.636	20.6846	63	1.0128	0.72	5.34	55.29	123.667	2.33333	126	0.0577583	undersize	14.8667	14.8667
193	c_putzuidu	1	calcari	2.448	50.636	20.6846	63	1.0128	0.72	5.34	55.29	123.667	2.33333	126	0.0577583	stock	3	3
194	c_putzuidu	1	calcari	2.448	50.636	20.6846	63	1.0128	0.72	5.34	55.29	123.667	2.33333	126	0.0577583	fertile	8.86667	8.86667
195	c_putzuidu	1	calcari	2.448	50.636	20.6846	63	1.0128	0.72	5.34	55.29	123.667	2.33333	126	0.0577583	tot	17.8667	17.8667
197	c_putzuidu	1	posiroccia	4.347	42.152	9.6968	10	0.1608	0.72	5.34	55.29	123.667	2.33333	126	0.0646837	a	0.13	0.13
198	c_putzuidu	1	posiroccia	4.347	42.152	9.6968	10	0.1608	0.72	5.34	55.29	123.667	2.33333	126	0.0646837	b	0.33	0.33
199	c_putzuidu	1	posiroccia	4.347	42.152	9.6968	10	0.1608	0.72	5.34	55.29	123.667	2.33333	126	0.0646837	c	0.87	0.87
200	c_putzuidu	1	posiroccia	4.347	42.152	9.6968	10	0.1608	0.72	5.34	55.29	123.667	2.33333	126	0.0646837	d	2.2	2.2
201	c_putzuidu	1	posiroccia	4.347	42.152	9.6968	10	0.1608	0.72	5.34	55.29	123.667	2.33333	126	0.0646837	e	1.4	1.4
202	c_putzuidu	1	posiroccia	4.347	42.152	9.6968	10	0.1608	0.72	5.34	55.29	123.667	2.33333	126	0.0646837	f	0.533333	0.533333
203	c_putzuidu	1	posiroccia	4.347	42.152	9.6968	10	0.1608	0.72	5.34	55.29	123.667	2.33333	126	0.0646837	g	0.133333	0.133333
204	c_putzuidu	1	posiroccia	4.347	42.152	9.6968	10	0.1608	0.72	5.34	55.29	123.667	2.33333	126	0.0646837	rec	0.46	0.46
205	c_putzuidu	1	posiroccia	4.347	42.152	9.6968	10	0.1608	0.72	5.34	55.29	123.667	2.33333	126	0.0646837	young	4.47	4.47
206	c_putzuidu	1	posiroccia	4.347	42.152	9.6968	10	0.1608	0.72	5.34	55.29	123.667	2.33333	126	0.0646837	undersize	4.93	4.93
207	c_putzuidu	1	posiroccia	4.347	42.152	9.6968	10	0.1608	0.72	5.34	55.29	123.667	2.33333	126	0.0646837	stock	0.666667	0.666667
208	c_putzuidu	1	posiroccia	4.347	42.152	9.6968	10	0.1608	0.72	5.34	55.29	123.667	2.33333	126	0.0646837	fertile	4.26667	4.26667
209	c_putzuidu	1	posiroccia	4.347	42.152	9.6968	10	0.1608	0.72	5.34	55.29	123.667	2.33333	126	0.0646837	tot	5.59667	5.59667
210	c_putzuidu	1	posiroccia	4.347	42.152	9.6968	10	0.1608	0.72	5.34	55.29	123.667	2.33333	126	0.0646837	stockper	11.9119	11.9119
211	c_putzuidu	1	posiroccia	4.347	42.152	9.6968	10	0.1608	0.72	5.34	55.29	36	4	40	0.0475012	a	0	0
212	c_putzuidu	1	posiroccia	4.347	42.152	9.6968	10	0.1608	0.72	5.34	55.29	36	4	40	0.0475012	b	0	0
213	c_putzuidu	1	posiroccia	4.347	42.152	9.6968	10	0.1608	0.72	5.34	55.29	36	4	40	0.0475012	c	0.6	0.6
214	c_putzuidu	1	posiroccia	4.347	42.152	9.6968	10	0.1608	0.72	5.34	55.29	36	4	40	0.0475012	d	0.266667	0.266667
215	c_putzuidu	1	posiroccia	4.347	42.152	9.6968	10	0.1608	0.72	5.34	55.29	36	4	40	0.0475012	e	1.13333	1.13333
216	c_putzuidu	1	posiroccia	4.347	42.152	9.6968	10	0.1608	0.72	5.34	55.29	36	4	40	0.0475012	f	0.266667	0.266667
217	c_putzuidu	1	posiroccia	4.347	42.152	9.6968	10	0.1608	0.72	5.34	55.29	36	4	40	0.0475012	g	0	0
218	c_putzuidu	1	posiroccia	4.347	42.152	9.6968	10	0.1608	0.72	5.34	55.29	36	4	40	0.0475012	rec	0	0
219	c_putzuidu	1	posiroccia	4.347	42.152	9.6968	10	0.1608	0.72	5.34	55.29	36	4	40	0.0475012	young	2	2
220	c_putzuidu	1	posiroccia	4.347	42.152	9.6968	10	0.1608	0.72	5.34	55.29	36	4	40	0.0475012	undersize	2	2
221	c_putzuidu	1	posiroccia	4.347	42.152	9.6968	10	0.1608	0.72	5.34	55.29	36	4	40	0.0475012	stock	0.266667	0.266667
222	c_putzuidu	1	posiroccia	4.347	42.152	9.6968	10	0.1608	0.72	5.34	55.29	36	4	40	0.0475012	fertile	1.66667	1.66667
223	c_putzuidu	1	posiroccia	4.347	42.152	9.6968	10	0.1608	0.72	5.34	55.29	36	4	40	0.0475012	tot	2.26667	2.26667
224	c_putzuidu	1	posiroccia	4.347	42.152	9.6968	10	0.1608	0.72	5.34	55.29	36	4	40	0.0475012	stockper	11.7647	11.7647
225	c_putzuidu	1	calcari	2.448	50.636	20.6846	63	1.0128	0.72	5.34	55.29	36	4	40	0.0648607	a	4	4
226	c_putzuidu	1	calcari	2.448	50.636	20.6846	63	1.0128	0.72	5.34	55.29	36	4	40	0.0648607	b	9.6	9.6
227	c_putzuidu	1	calcari	2.448	50.636	20.6846	63	1.0128	0.72	5.34	55.29	36	4	40	0.0648607	c	5.27	5.27
228	c_putzuidu	1	calcari	2.448	50.636	20.6846	63	1.0128	0.72	5.34	55.29	36	4	40	0.0648607	d	2.13333	2.13333
229	c_putzuidu	1	calcari	2.448	50.636	20.6846	63	1.0128	0.72	5.34	55.29	36	4	40	0.0648607	e	4	4
230	c_putzuidu	1	calcari	2.448	50.636	20.6846	63	1.0128	0.72	5.34	55.29	36	4	40	0.0648607	f	1.6	1.6
231	c_putzuidu	1	calcari	2.448	50.636	20.6846	63	1.0128	0.72	5.34	55.29	36	4	40	0.0648607	g	0.0666667	0.0666667
232	c_putzuidu	1	calcari	2.448	50.636	20.6846	63	1.0128	0.72	5.34	55.29	36	4	40	0.0648607	rec	13.6	13.6
233	c_putzuidu	1	calcari	2.448	50.636	20.6846	63	1.0128	0.72	5.34	55.29	36	4	40	0.0648607	young	11.4033	11.4033
234	c_putzuidu	1	calcari	2.448	50.636	20.6846	63	1.0128	0.72	5.34	55.29	36	4	40	0.0648607	undersize	25.0033	25.0033
235	c_putzuidu	1	calcari	2.448	50.636	20.6846	63	1.0128	0.72	5.34	55.29	36	4	40	0.0648607	stock	1.66667	1.66667
236	c_putzuidu	1	calcari	2.448	50.636	20.6846	63	1.0128	0.72	5.34	55.29	36	4	40	0.0648607	fertile	7.8	7.8
237	c_putzuidu	1	calcari	2.448	50.636	20.6846	63	1.0128	0.72	5.34	55.29	36	4	40	0.0648607	tot	26.67	26.67
238	c_putzuidu	1	calcari	2.448	50.636	20.6846	63	1.0128	0.72	5.34	55.29	36	4	40	0.0648607	stockper	6.24922	6.24922
239	c_putzuidu	1	calcari	1.013	25.38	25.0543	63	1.0128	0.72	5.34	55.29	36	4	40	0.0580896	a	1.33	1.33
240	c_putzuidu	1	calcari	1.013	25.38	25.0543	63	1.0128	0.72	5.34	55.29	36	4	40	0.0580896	b	3.53	3.53
241	c_putzuidu	1	calcari	1.013	25.38	25.0543	63	1.0128	0.72	5.34	55.29	36	4	40	0.0580896	c	3.8	3.8
242	c_putzuidu	1	calcari	1.013	25.38	25.0543	63	1.0128	0.72	5.34	55.29	36	4	40	0.0580896	d	2.4	2.4
243	c_putzuidu	1	calcari	1.013	25.38	25.0543	63	1.0128	0.72	5.34	55.29	36	4	40	0.0580896	e	3.8	3.8
244	c_putzuidu	1	calcari	1.013	25.38	25.0543	63	1.0128	0.72	5.34	55.29	36	4	40	0.0580896	f	1.46667	1.46667
245	c_putzuidu	1	calcari	1.013	25.38	25.0543	63	1.0128	0.72	5.34	55.29	36	4	40	0.0580896	g	0	0
246	c_putzuidu	1	calcari	1.013	25.38	25.0543	63	1.0128	0.72	5.34	55.29	36	4	40	0.0580896	rec	4.86	4.86
247	c_putzuidu	1	calcari	1.013	25.38	25.0543	63	1.0128	0.72	5.34	55.29	36	4	40	0.0580896	young	10	10
248	c_putzuidu	1	calcari	1.013	25.38	25.0543	63	1.0128	0.72	5.34	55.29	36	4	40	0.0580896	undersize	14.86	14.86
249	c_putzuidu	1	calcari	1.013	25.38	25.0543	63	1.0128	0.72	5.34	55.29	36	4	40	0.0580896	stock	1.46667	1.46667
250	c_putzuidu	1	calcari	1.013	25.38	25.0543	63	1.0128	0.72	5.34	55.29	36	4	40	0.0580896	fertile	7.66667	7.66667
251	c_putzuidu	1	calcari	1.013	25.38	25.0543	63	1.0128	0.72	5.34	55.29	36	4	40	0.0580896	tot	16.3267	16.3267
252	c_putzuidu	1	calcari	1.013	25.38	25.0543	63	1.0128	0.72	5.34	55.29	36	4	40	0.0580896	stockper	8.98326	8.98326
253	d_sutingiosu	1	posiroccia	4.347	42.152	9.6968	10	0.1608	0.72	5.34	55.29	36	4	40	0.0586969	a	0.07	0.07
254	d_sutingiosu	1	posiroccia	4.347	42.152	9.6968	10	0.1608	0.72	5.34	55.29	36	4	40	0.0586969	b	0.07	0.07
255	d_sutingiosu	1	posiroccia	4.347	42.152	9.6968	10	0.1608	0.72	5.34	55.29	36	4	40	0.0586969	c	0.2	0.2
256	d_sutingiosu	1	posiroccia	4.347	42.152	9.6968	10	0.1608	0.72	5.34	55.29	36	4	40	0.0586969	d	3.66667	3.66667
257	d_sutingiosu	1	posiroccia	4.347	42.152	9.6968	10	0.1608	0.72	5.34	55.29	36	4	40	0.0586969	e	3.6	3.6
258	d_sutingiosu	1	posiroccia	4.347	42.152	9.6968	10	0.1608	0.72	5.34	55.29	36	4	40	0.0586969	f	2.66667	2.66667
259	d_sutingiosu	1	posiroccia	4.347	42.152	9.6968	10	0.1608	0.72	5.34	55.29	36	4	40	0.0586969	g	0.2	0.2
260	d_sutingiosu	1	posiroccia	4.347	42.152	9.6968	10	0.1608	0.72	5.34	55.29	36	4	40	0.0586969	rec	0.14	0.14
261	d_sutingiosu	1	posiroccia	4.347	42.152	9.6968	10	0.1608	0.72	5.34	55.29	36	4	40	0.0586969	young	7.46667	7.46667
262	d_sutingiosu	1	posiroccia	4.347	42.152	9.6968	10	0.1608	0.72	5.34	55.29	36	4	40	0.0586969	undersize	7.60667	7.60667
263	d_sutingiosu	1	posiroccia	4.347	42.152	9.6968	10	0.1608	0.72	5.34	55.29	36	4	40	0.0586969	stock	2.86667	2.86667
264	d_sutingiosu	1	posiroccia	4.347	42.152	9.6968	10	0.1608	0.72	5.34	55.29	36	4	40	0.0586969	fertile	10.1333	10.1333
265	d_sutingiosu	1	posiroccia	4.347	42.152	9.6968	10	0.1608	0.72	5.34	55.29	36	4	40	0.0586969	tot	10.4733	10.4733
266	d_sutingiosu	1	posiroccia	4.347	42.152	9.6968	10	0.1608	0.72	5.34	55.29	36	4	40	0.0586969	stockper	27.3711	27.3711
267	d_sutingiosu	1	calcari	1.078	19.153	17.7672	63	1.0128	0.72	5.34	55.29	26.6667	16	42.6667	0.0529191	a	6.27	6.27
268	d_sutingiosu	1	calcari	1.078	19.153	17.7672	63	1.0128	0.72	5.34	55.29	26.6667	16	42.6667	0.0529191	b	6.4	6.4
269	d_sutingiosu	1	calcari	1.078	19.153	17.7672	63	1.0128	0.72	5.34	55.29	26.6667	16	42.6667	0.0529191	c	2.27	2.27
270	d_sutingiosu	1	calcari	1.078	19.153	17.7672	63	1.0128	0.72	5.34	55.29	26.6667	16	42.6667	0.0529191	d	1.8	1.8
271	d_sutingiosu	1	calcari	1.078	19.153	17.7672	63	1.0128	0.72	5.34	55.29	26.6667	16	42.6667	0.0529191	e	2	2
272	d_sutingiosu	1	calcari	1.078	19.153	17.7672	63	1.0128	0.72	5.34	55.29	26.6667	16	42.6667	0.0529191	f	0.866667	0.866667
273	d_sutingiosu	1	calcari	1.078	19.153	17.7672	63	1.0128	0.72	5.34	55.29	26.6667	16	42.6667	0.0529191	g	0	0
274	d_sutingiosu	1	calcari	1.078	19.153	17.7672	63	1.0128	0.72	5.34	55.29	26.6667	16	42.6667	0.0529191	rec	12.67	12.67
275	d_sutingiosu	1	calcari	1.078	19.153	17.7672	63	1.0128	0.72	5.34	55.29	26.6667	16	42.6667	0.0529191	young	6.07	6.07
276	d_sutingiosu	1	calcari	1.078	19.153	17.7672	63	1.0128	0.72	5.34	55.29	26.6667	16	42.6667	0.0529191	undersize	18.74	18.74
277	d_sutingiosu	1	calcari	1.078	19.153	17.7672	63	1.0128	0.72	5.34	55.29	26.6667	16	42.6667	0.0529191	stock	0.866667	0.866667
278	d_sutingiosu	1	calcari	1.078	19.153	17.7672	63	1.0128	0.72	5.34	55.29	26.6667	16	42.6667	0.0529191	fertile	4.66667	4.66667
279	d_sutingiosu	1	calcari	1.078	19.153	17.7672	63	1.0128	0.72	5.34	55.29	26.6667	16	42.6667	0.0529191	tot	19.6067	19.6067
280	d_sutingiosu	1	calcari	1.078	19.153	17.7672	63	1.0128	0.72	5.34	55.29	26.6667	16	42.6667	0.0529191	stockper	4.42027	4.42027
281	d_sutingiosu	1	posiroccia	4.347	42.152	9.6968	10	0.1608	0.72	5.34	55.29	26.6667	16	42.6667	0.0475815	a	0	0
282	d_sutingiosu	1	posiroccia	4.347	42.152	9.6968	10	0.1608	0.72	5.34	55.29	26.6667	16	42.6667	0.0475815	b	0.07	0.07
283	d_sutingiosu	1	posiroccia	4.347	42.152	9.6968	10	0.1608	0.72	5.34	55.29	26.6667	16	42.6667	0.0475815	c	0.73	0.73
284	d_sutingiosu	1	posiroccia	4.347	42.152	9.6968	10	0.1608	0.72	5.34	55.29	26.6667	16	42.6667	0.0475815	d	1.46667	1.46667
285	d_sutingiosu	1	posiroccia	4.347	42.152	9.6968	10	0.1608	0.72	5.34	55.29	26.6667	16	42.6667	0.0475815	e	0.733333	0.733333
286	d_sutingiosu	1	posiroccia	4.347	42.152	9.6968	10	0.1608	0.72	5.34	55.29	26.6667	16	42.6667	0.0475815	f	0.6	0.6
287	d_sutingiosu	1	posiroccia	4.347	42.152	9.6968	10	0.1608	0.72	5.34	55.29	26.6667	16	42.6667	0.0475815	g	0.133333	0.133333
288	d_sutingiosu	1	posiroccia	4.347	42.152	9.6968	10	0.1608	0.72	5.34	55.29	26.6667	16	42.6667	0.0475815	rec	0.07	0.07
289	d_sutingiosu	1	posiroccia	4.347	42.152	9.6968	10	0.1608	0.72	5.34	55.29	26.6667	16	42.6667	0.0475815	young	2.93	2.93
290	d_sutingiosu	1	posiroccia	4.347	42.152	9.6968	10	0.1608	0.72	5.34	55.29	26.6667	16	42.6667	0.0475815	undersize	3	3
291	d_sutingiosu	1	posiroccia	4.347	42.152	9.6968	10	0.1608	0.72	5.34	55.29	26.6667	16	42.6667	0.0475815	stock	0.733333	0.733333
292	d_sutingiosu	1	posiroccia	4.347	42.152	9.6968	10	0.1608	0.72	5.34	55.29	26.6667	16	42.6667	0.0475815	fertile	2.93333	2.93333
293	d_sutingiosu	1	posiroccia	4.347	42.152	9.6968	10	0.1608	0.72	5.34	55.29	26.6667	16	42.6667	0.0475815	tot	3.73333	3.73333
294	d_sutingiosu	1	posiroccia	4.347	42.152	9.6968	10	0.1608	0.72	5.34	55.29	26.6667	16	42.6667	0.0475815	stockper	19.6429	19.6429
295	d_sutingiosu	1	calcari	1.078	19.153	17.7672	63	1.0128	0.72	5.34	55.29	26.6667	16	42.6667	0.0603563	a	1.93	1.93
296	d_sutingiosu	1	calcari	1.078	19.153	17.7672	63	1.0128	0.72	5.34	55.29	26.6667	16	42.6667	0.0603563	b	1.67	1.67
297	d_sutingiosu	1	calcari	1.078	19.153	17.7672	63	1.0128	0.72	5.34	55.29	26.6667	16	42.6667	0.0603563	c	1.8	1.8
298	d_sutingiosu	1	calcari	1.078	19.153	17.7672	63	1.0128	0.72	5.34	55.29	26.6667	16	42.6667	0.0603563	d	1.66667	1.66667
299	d_sutingiosu	1	calcari	1.078	19.153	17.7672	63	1.0128	0.72	5.34	55.29	26.6667	16	42.6667	0.0603563	e	2.6	2.6
300	d_sutingiosu	1	calcari	1.078	19.153	17.7672	63	1.0128	0.72	5.34	55.29	26.6667	16	42.6667	0.0603563	f	2.06667	2.06667
301	d_sutingiosu	1	calcari	1.078	19.153	17.7672	63	1.0128	0.72	5.34	55.29	26.6667	16	42.6667	0.0603563	g	0.0666667	0.0666667
302	d_sutingiosu	1	calcari	1.078	19.153	17.7672	63	1.0128	0.72	5.34	55.29	26.6667	16	42.6667	0.0603563	rec	3.6	3.6
303	d_sutingiosu	1	calcari	1.078	19.153	17.7672	63	1.0128	0.72	5.34	55.29	26.6667	16	42.6667	0.0603563	young	6.06667	6.06667
304	d_sutingiosu	1	calcari	1.078	19.153	17.7672	63	1.0128	0.72	5.34	55.29	26.6667	16	42.6667	0.0603563	undersize	9.66667	9.66667
305	d_sutingiosu	1	calcari	1.078	19.153	17.7672	63	1.0128	0.72	5.34	55.29	26.6667	16	42.6667	0.0603563	stock	2.13333	2.13333
306	d_sutingiosu	1	calcari	1.078	19.153	17.7672	63	1.0128	0.72	5.34	55.29	26.6667	16	42.6667	0.0603563	fertile	6.4	6.4
307	d_sutingiosu	1	calcari	1.078	19.153	17.7672	63	1.0128	0.72	5.34	55.29	26.6667	16	42.6667	0.0603563	tot	11.8	11.8
308	d_sutingiosu	1	calcari	1.078	19.153	17.7672	63	1.0128	0.72	5.34	55.29	26.6667	16	42.6667	0.0603563	stockper	18.0791	18.0791
309	d_sutingiosu	1	posiroccia	4.347	42.152	9.6968	10	0.1608	0.72	5.34	55.29	26.6667	16	42.6667	0.0562878	a	0	0
310	d_sutingiosu	1	posiroccia	4.347	42.152	9.6968	10	0.1608	0.72	5.34	55.29	26.6667	16	42.6667	0.0562878	b	0	0
311	d_sutingiosu	1	posiroccia	4.347	42.152	9.6968	10	0.1608	0.72	5.34	55.29	26.6667	16	42.6667	0.0562878	c	0.27	0.27
312	d_sutingiosu	1	posiroccia	4.347	42.152	9.6968	10	0.1608	0.72	5.34	55.29	26.6667	16	42.6667	0.0562878	d	0.933333	0.933333
313	d_sutingiosu	1	posiroccia	4.347	42.152	9.6968	10	0.1608	0.72	5.34	55.29	26.6667	16	42.6667	0.0562878	e	1	1
314	d_sutingiosu	1	posiroccia	4.347	42.152	9.6968	10	0.1608	0.72	5.34	55.29	26.6667	16	42.6667	0.0562878	f	0.266667	0.266667
315	d_sutingiosu	1	posiroccia	4.347	42.152	9.6968	10	0.1608	0.72	5.34	55.29	26.6667	16	42.6667	0.0562878	g	0.0666667	0.0666667
316	d_sutingiosu	1	posiroccia	4.347	42.152	9.6968	10	0.1608	0.72	5.34	55.29	26.6667	16	42.6667	0.0562878	rec	0	0
317	d_sutingiosu	1	posiroccia	4.347	42.152	9.6968	10	0.1608	0.72	5.34	55.29	26.6667	16	42.6667	0.0562878	young	2.20333	2.20333
318	d_sutingiosu	1	posiroccia	4.347	42.152	9.6968	10	0.1608	0.72	5.34	55.29	26.6667	16	42.6667	0.0562878	undersize	2.20333	2.20333
319	d_sutingiosu	1	posiroccia	4.347	42.152	9.6968	10	0.1608	0.72	5.34	55.29	26.6667	16	42.6667	0.0562878	stock	0.333333	0.333333
320	d_sutingiosu	1	posiroccia	4.347	42.152	9.6968	10	0.1608	0.72	5.34	55.29	26.6667	16	42.6667	0.0562878	fertile	2.26667	2.26667
321	d_sutingiosu	1	posiroccia	4.347	42.152	9.6968	10	0.1608	0.72	5.34	55.29	26.6667	16	42.6667	0.0562878	tot	2.53667	2.53667
322	d_sutingiosu	1	posiroccia	4.347	42.152	9.6968	10	0.1608	0.72	5.34	55.29	26.6667	16	42.6667	0.0562878	stockper	13.1406	13.1406
323	d_sutingiosu	1	calcari	1.078	19.153	17.7672	63	1.0128	0.07	2.99	68.55	26.6667	16	42.6667	0.0549363	a	5.6	5.6
324	d_sutingiosu	1	calcari	1.078	19.153	17.7672	63	1.0128	0.07	2.99	68.55	26.6667	16	42.6667	0.0549363	b	5.4	5.4
325	d_sutingiosu	1	calcari	1.078	19.153	17.7672	63	1.0128	0.07	2.99	68.55	26.6667	16	42.6667	0.0549363	c	3.93	3.93
326	d_sutingiosu	1	calcari	1.078	19.153	17.7672	63	1.0128	0.07	2.99	68.55	26.6667	16	42.6667	0.0549363	d	0.533333	0.533333
327	d_sutingiosu	1	calcari	1.078	19.153	17.7672	63	1.0128	0.07	2.99	68.55	26.6667	16	42.6667	0.0549363	e	0.6	0.6
328	d_sutingiosu	1	calcari	1.078	19.153	17.7672	63	1.0128	0.07	2.99	68.55	26.6667	16	42.6667	0.0549363	f	0.266667	0.266667
329	d_sutingiosu	1	calcari	1.078	19.153	17.7672	63	1.0128	0.07	2.99	68.55	26.6667	16	42.6667	0.0549363	g	0	0
330	d_sutingiosu	1	calcari	1.078	19.153	17.7672	63	1.0128	0.07	2.99	68.55	26.6667	16	42.6667	0.0549363	rec	11	11
331	d_sutingiosu	1	calcari	1.078	19.153	17.7672	63	1.0128	0.07	2.99	68.55	26.6667	16	42.6667	0.0549363	young	5.06333	5.06333
332	d_sutingiosu	1	calcari	1.078	19.153	17.7672	63	1.0128	0.07	2.99	68.55	26.6667	16	42.6667	0.0549363	undersize	16.0633	16.0633
333	d_sutingiosu	1	calcari	1.078	19.153	17.7672	63	1.0128	0.07	2.99	68.55	26.6667	16	42.6667	0.0549363	stock	0.266667	0.266667
334	d_sutingiosu	1	calcari	1.078	19.153	17.7672	63	1.0128	0.07	2.99	68.55	26.6667	16	42.6667	0.0549363	fertile	1.4	1.4
335	d_sutingiosu	1	calcari	1.078	19.153	17.7672	63	1.0128	0.07	2.99	68.55	26.6667	16	42.6667	0.0549363	tot	16.33	16.33
336	d_sutingiosu	1	calcari	1.078	19.153	17.7672	63	1.0128	0.07	2.99	68.55	26.6667	16	42.6667	0.0549363	stockper	1.63299	1.63299
337	e_portosuedda	2	calcari	2.548	38.775	15.2178	8	0.624	0.31	16.97	98.92	36.3333	8	44.3333	0.117087	a	0.13	0.13
338	e_portosuedda	2	calcari	2.548	38.775	15.2178	8	0.624	0.31	16.97	98.92	36.3333	8	44.3333	0.117087	b	0.27	0.27
339	e_portosuedda	2	calcari	2.548	38.775	15.2178	8	0.624	0.31	16.97	98.92	36.3333	8	44.3333	0.117087	c	1	1
340	e_portosuedda	2	calcari	2.548	38.775	15.2178	8	0.624	0.31	16.97	98.92	36.3333	8	44.3333	0.117087	d	2.13333	2.13333
341	e_portosuedda	2	calcari	2.548	38.775	15.2178	8	0.624	0.31	16.97	98.92	36.3333	8	44.3333	0.117087	e	4.8	4.8
342	e_portosuedda	2	calcari	2.548	38.775	15.2178	8	0.624	0.31	16.97	98.92	36.3333	8	44.3333	0.117087	f	4	4
343	e_portosuedda	2	calcari	2.548	38.775	15.2178	8	0.624	0.31	16.97	98.92	36.3333	8	44.3333	0.117087	g	0.333333	0.333333
344	e_portosuedda	2	calcari	2.548	38.775	15.2178	8	0.624	0.31	16.97	98.92	36.3333	8	44.3333	0.117087	rec	0.4	0.4
345	e_portosuedda	2	calcari	2.548	38.775	15.2178	8	0.624	0.31	16.97	98.92	36.3333	8	44.3333	0.117087	young	7.93333	7.93333
346	e_portosuedda	2	calcari	2.548	38.775	15.2178	8	0.624	0.31	16.97	98.92	36.3333	8	44.3333	0.117087	undersize	8.33333	8.33333
347	e_portosuedda	2	calcari	2.548	38.775	15.2178	8	0.624	0.31	16.97	98.92	36.3333	8	44.3333	0.117087	stock	4.33333	4.33333
348	e_portosuedda	2	calcari	2.548	38.775	15.2178	8	0.624	0.31	16.97	98.92	36.3333	8	44.3333	0.117087	fertile	11.2667	11.2667
349	e_portosuedda	2	calcari	2.548	38.775	15.2178	8	0.624	0.31	16.97	98.92	36.3333	8	44.3333	0.117087	tot	12.6667	12.6667
350	e_portosuedda	2	calcari	2.548	38.775	15.2178	8	0.624	0.31	16.97	98.92	36.3333	8	44.3333	0.117087	stockper	34.2105	34.2105
351	e_portosuedda	2	calcari	2.548	38.775	15.2178	8	0.624	0.31	16.97	98.92	16.6667	24.6667	41.3333	0.113821	a	0.044444	0.044444
352	e_portosuedda	2	calcari	2.548	38.775	15.2178	8	0.624	0.31	16.97	98.92	16.6667	24.6667	41.3333	0.113821	b	0.8	0.8
353	e_portosuedda	2	calcari	2.548	38.775	15.2178	8	0.624	0.31	16.97	98.92	16.6667	24.6667	41.3333	0.113821	c	1.2	1.2
354	e_portosuedda	2	calcari	2.548	38.775	15.2178	8	0.624	0.31	16.97	98.92	16.6667	24.6667	41.3333	0.113821	d	0.633333	0.633333
355	e_portosuedda	2	calcari	2.548	38.775	15.2178	8	0.624	0.31	16.97	98.92	16.6667	24.6667	41.3333	0.113821	e	2.35556	2.35556
356	e_portosuedda	2	calcari	2.548	38.775	15.2178	8	0.624	0.31	16.97	98.92	16.6667	24.6667	41.3333	0.113821	f	1.42222	1.42222
357	e_portosuedda	2	calcari	2.548	38.775	15.2178	8	0.624	0.31	16.97	98.92	16.6667	24.6667	41.3333	0.113821	g	0.2	0.2
358	e_portosuedda	2	calcari	2.548	38.775	15.2178	8	0.624	0.31	16.97	98.92	16.6667	24.6667	41.3333	0.113821	rec	0.844444	0.844444
359	e_portosuedda	2	calcari	2.548	38.775	15.2178	8	0.624	0.31	16.97	98.92	16.6667	24.6667	41.3333	0.113821	young	4.18889	4.18889
360	e_portosuedda	2	calcari	2.548	38.775	15.2178	8	0.624	0.31	16.97	98.92	16.6667	24.6667	41.3333	0.113821	undersize	5.03333	5.03333
361	e_portosuedda	2	calcari	2.548	38.775	15.2178	8	0.624	0.31	16.97	98.92	16.6667	24.6667	41.3333	0.113821	stock	1.62222	1.62222
362	e_portosuedda	2	calcari	2.548	38.775	15.2178	8	0.624	0.31	16.97	98.92	16.6667	24.6667	41.3333	0.113821	fertile	4.61111	4.61111
363	e_portosuedda	2	calcari	2.548	38.775	15.2178	8	0.624	0.31	16.97	98.92	16.6667	24.6667	41.3333	0.113821	tot	6.65556	6.65556
364	e_portosuedda	2	calcari	2.548	38.775	15.2178	8	0.624	0.31	16.97	98.92	16.6667	24.6667	41.3333	0.113821	stockper	24.374	24.374
365	e_portosuedda	2	posiroccia	2.284	30.126	13.19	1	0.078	2.28	17.81	46.33	16.6667	24.6667	41.3333	0.102835	a	0.022222	0.022222
366	e_portosuedda	2	posiroccia	2.284	30.126	13.19	1	0.078	2.28	17.81	46.33	16.6667	24.6667	41.3333	0.102835	b	0.066667	0.066667
367	e_portosuedda	2	posiroccia	2.284	30.126	13.19	1	0.078	2.28	17.81	46.33	16.6667	24.6667	41.3333	0.102835	c	0.244444	0.244444
368	e_portosuedda	2	posiroccia	2.284	30.126	13.19	1	0.078	2.28	17.81	46.33	16.6667	24.6667	41.3333	0.102835	d	1.55556	1.55556
369	e_portosuedda	2	posiroccia	2.284	30.126	13.19	1	0.078	2.28	17.81	46.33	16.6667	24.6667	41.3333	0.102835	e	1.97778	1.97778
370	e_portosuedda	2	posiroccia	2.284	30.126	13.19	1	0.078	2.28	17.81	46.33	16.6667	24.6667	41.3333	0.102835	f	0.266667	0.266667
371	e_portosuedda	2	posiroccia	2.284	30.126	13.19	1	0.078	2.28	17.81	46.33	16.6667	24.6667	41.3333	0.102835	g	0	0
372	e_portosuedda	2	posiroccia	2.284	30.126	13.19	1	0.078	2.28	17.81	46.33	16.6667	24.6667	41.3333	0.102835	rec	0.088889	0.088889
373	e_portosuedda	2	posiroccia	2.284	30.126	13.19	1	0.078	2.28	17.81	46.33	16.6667	24.6667	41.3333	0.102835	young	3.77778	3.77778
374	e_portosuedda	2	posiroccia	2.284	30.126	13.19	1	0.078	2.28	17.81	46.33	16.6667	24.6667	41.3333	0.102835	undersize	3.86667	3.86667
375	e_portosuedda	2	posiroccia	2.284	30.126	13.19	1	0.078	2.28	17.81	46.33	16.6667	24.6667	41.3333	0.102835	stock	0.266667	0.266667
376	e_portosuedda	2	posiroccia	2.284	30.126	13.19	1	0.078	2.28	17.81	46.33	16.6667	24.6667	41.3333	0.102835	fertile	3.8	3.8
377	e_portosuedda	2	posiroccia	2.284	30.126	13.19	1	0.078	2.28	17.81	46.33	16.6667	24.6667	41.3333	0.102835	tot	4.13333	4.13333
378	e_portosuedda	2	posiroccia	2.284	30.126	13.19	1	0.078	2.28	17.81	46.33	16.6667	24.6667	41.3333	0.102835	stockper	6.45161	6.45161
379	e_portosuedda	2	calcari	2.548	38.775	15.2178	8	0.624	0.31	16.97	98.92	36.3333	8	44.3333	0.0982316	a	1	1
380	e_portosuedda	2	calcari	2.548	38.775	15.2178	8	0.624	0.31	16.97	98.92	36.3333	8	44.3333	0.0982316	b	1.4	1.4
381	e_portosuedda	2	calcari	2.548	38.775	15.2178	8	0.624	0.31	16.97	98.92	36.3333	8	44.3333	0.0982316	c	1.67	1.67
382	e_portosuedda	2	calcari	2.548	38.775	15.2178	8	0.624	0.31	16.97	98.92	36.3333	8	44.3333	0.0982316	d	1.26667	1.26667
383	e_portosuedda	2	calcari	2.548	38.775	15.2178	8	0.624	0.31	16.97	98.92	36.3333	8	44.3333	0.0982316	e	1.4	1.4
384	e_portosuedda	2	calcari	2.548	38.775	15.2178	8	0.624	0.31	16.97	98.92	36.3333	8	44.3333	0.0982316	f	1	1
385	e_portosuedda	2	calcari	2.548	38.775	15.2178	8	0.624	0.31	16.97	98.92	36.3333	8	44.3333	0.0982316	g	0.133333	0.133333
386	e_portosuedda	2	calcari	2.548	38.775	15.2178	8	0.624	0.31	16.97	98.92	36.3333	8	44.3333	0.0982316	rec	2.4	2.4
387	e_portosuedda	2	calcari	2.548	38.775	15.2178	8	0.624	0.31	16.97	98.92	36.3333	8	44.3333	0.0982316	young	4.33667	4.33667
388	e_portosuedda	2	calcari	2.548	38.775	15.2178	8	0.624	0.31	16.97	98.92	36.3333	8	44.3333	0.0982316	undersize	6.73667	6.73667
389	e_portosuedda	2	calcari	2.548	38.775	15.2178	8	0.624	0.31	16.97	98.92	36.3333	8	44.3333	0.0982316	stock	1.13333	1.13333
390	e_portosuedda	2	calcari	2.548	38.775	15.2178	8	0.624	0.31	16.97	98.92	36.3333	8	44.3333	0.0982316	fertile	3.8	3.8
391	e_portosuedda	2	calcari	2.548	38.775	15.2178	8	0.624	0.31	16.97	98.92	36.3333	8	44.3333	0.0982316	tot	7.87	7.87
392	e_portosuedda	2	calcari	2.548	38.775	15.2178	8	0.624	0.31	16.97	98.92	36.3333	8	44.3333	0.0982316	stockper	14.4007	14.4007
393	e_portosuedda	2	posiroccia	2.284	30.126	13.19	1	0.078	2.28	17.81	46.33	36.3333	8	44.3333	0.089895	a	0	0
394	e_portosuedda	2	posiroccia	2.284	30.126	13.19	1	0.078	2.28	17.81	46.33	36.3333	8	44.3333	0.089895	b	0.2	0.2
395	e_portosuedda	2	posiroccia	2.284	30.126	13.19	1	0.078	2.28	17.81	46.33	36.3333	8	44.3333	0.089895	c	0.8	0.8
396	e_portosuedda	2	posiroccia	2.284	30.126	13.19	1	0.078	2.28	17.81	46.33	36.3333	8	44.3333	0.089895	d	2.1	2.1
397	e_portosuedda	2	posiroccia	2.284	30.126	13.19	1	0.078	2.28	17.81	46.33	36.3333	8	44.3333	0.089895	e	3.46667	3.46667
398	e_portosuedda	2	posiroccia	2.284	30.126	13.19	1	0.078	2.28	17.81	46.33	36.3333	8	44.3333	0.089895	f	2.4	2.4
399	e_portosuedda	2	posiroccia	2.284	30.126	13.19	1	0.078	2.28	17.81	46.33	36.3333	8	44.3333	0.089895	g	0.333333	0.333333
400	e_portosuedda	2	posiroccia	2.284	30.126	13.19	1	0.078	2.28	17.81	46.33	36.3333	8	44.3333	0.089895	rec	0.2	0.2
401	e_portosuedda	2	posiroccia	2.284	30.126	13.19	1	0.078	2.28	17.81	46.33	36.3333	8	44.3333	0.089895	young	6.36667	6.36667
402	e_portosuedda	2	posiroccia	2.284	30.126	13.19	1	0.078	2.28	17.81	46.33	36.3333	8	44.3333	0.089895	undersize	6.56667	6.56667
403	e_portosuedda	2	posiroccia	2.284	30.126	13.19	1	0.078	2.28	17.81	46.33	36.3333	8	44.3333	0.089895	stock	2.73333	2.73333
404	e_portosuedda	2	posiroccia	2.284	30.126	13.19	1	0.078	2.28	17.81	46.33	36.3333	8	44.3333	0.089895	fertile	8.3	8.3
405	e_portosuedda	2	posiroccia	2.284	30.126	13.19	1	0.078	2.28	17.81	46.33	36.3333	8	44.3333	0.089895	tot	9.3	9.3
406	e_portosuedda	2	posiroccia	2.284	30.126	13.19	1	0.078	2.28	17.81	46.33	36.3333	8	44.3333	0.089895	stockper	29.3907	29.3907
407	e_portosuedda	2	calcari	2.548	38.775	15.2178	8	0.624	0.31	16.97	98.92	36.3333	8	44.3333	0.0725758	a	0.53	0.53
408	e_portosuedda	2	calcari	2.548	38.775	15.2178	8	0.624	0.31	16.97	98.92	36.3333	8	44.3333	0.0725758	b	1.2	1.2
409	e_portosuedda	2	calcari	2.548	38.775	15.2178	8	0.624	0.31	16.97	98.92	36.3333	8	44.3333	0.0725758	c	1.8	1.8
410	e_portosuedda	2	calcari	2.548	38.775	15.2178	8	0.624	0.31	16.97	98.92	36.3333	8	44.3333	0.0725758	d	1.53333	1.53333
411	e_portosuedda	2	calcari	2.548	38.775	15.2178	8	0.624	0.31	16.97	98.92	36.3333	8	44.3333	0.0725758	e	1.26667	1.26667
412	e_portosuedda	2	calcari	2.548	38.775	15.2178	8	0.624	0.31	16.97	98.92	36.3333	8	44.3333	0.0725758	f	0.933333	0.933333
413	e_portosuedda	2	calcari	2.548	38.775	15.2178	8	0.624	0.31	16.97	98.92	36.3333	8	44.3333	0.0725758	g	0.333333	0.333333
414	e_portosuedda	2	calcari	2.548	38.775	15.2178	8	0.624	0.31	16.97	98.92	36.3333	8	44.3333	0.0725758	rec	1.73	1.73
415	e_portosuedda	2	calcari	2.548	38.775	15.2178	8	0.624	0.31	16.97	98.92	36.3333	8	44.3333	0.0725758	young	4.6	4.6
416	e_portosuedda	2	calcari	2.548	38.775	15.2178	8	0.624	0.31	16.97	98.92	36.3333	8	44.3333	0.0725758	undersize	6.33	6.33
417	e_portosuedda	2	calcari	2.548	38.775	15.2178	8	0.624	0.31	16.97	98.92	36.3333	8	44.3333	0.0725758	stock	1.26667	1.26667
418	e_portosuedda	2	calcari	2.548	38.775	15.2178	8	0.624	0.31	16.97	98.92	36.3333	8	44.3333	0.0725758	fertile	4.06667	4.06667
419	e_portosuedda	2	calcari	2.548	38.775	15.2178	8	0.624	0.31	16.97	98.92	36.3333	8	44.3333	0.0725758	tot	7.59667	7.59667
420	e_portosuedda	2	calcari	2.548	38.775	15.2178	8	0.624	0.31	16.97	98.92	36.3333	8	44.3333	0.0725758	stockper	16.674	16.674
421	e_portosuedda	2	posiroccia	2.284	30.126	13.19	1	0.078	2.28	17.81	46.33	36.3333	8	44.3333	0.0710154	a	0	0
422	e_portosuedda	2	posiroccia	2.284	30.126	13.19	1	0.078	2.28	17.81	46.33	36.3333	8	44.3333	0.0710154	b	0.07	0.07
423	e_portosuedda	2	posiroccia	2.284	30.126	13.19	1	0.078	2.28	17.81	46.33	36.3333	8	44.3333	0.0710154	c	0.6	0.6
424	e_portosuedda	2	posiroccia	2.284	30.126	13.19	1	0.078	2.28	17.81	46.33	36.3333	8	44.3333	0.0710154	d	1.33333	1.33333
425	e_portosuedda	2	posiroccia	2.284	30.126	13.19	1	0.078	2.28	17.81	46.33	36.3333	8	44.3333	0.0710154	e	1.86667	1.86667
426	e_portosuedda	2	posiroccia	2.284	30.126	13.19	1	0.078	2.28	17.81	46.33	36.3333	8	44.3333	0.0710154	f	1.93333	1.93333
427	e_portosuedda	2	posiroccia	2.284	30.126	13.19	1	0.078	2.28	17.81	46.33	36.3333	8	44.3333	0.0710154	g	0.2	0.2
428	e_portosuedda	2	posiroccia	2.284	30.126	13.19	1	0.078	2.28	17.81	46.33	36.3333	8	44.3333	0.0710154	rec	0.07	0.07
429	e_portosuedda	2	posiroccia	2.284	30.126	13.19	1	0.078	2.28	17.81	46.33	36.3333	8	44.3333	0.0710154	young	3.8	3.8
430	e_portosuedda	2	posiroccia	2.284	30.126	13.19	1	0.078	2.28	17.81	46.33	36.3333	8	44.3333	0.0710154	undersize	3.87	3.87
431	e_portosuedda	2	posiroccia	2.284	30.126	13.19	1	0.078	2.28	17.81	46.33	36.3333	8	44.3333	0.0710154	stock	2.13333	2.13333
432	e_portosuedda	2	posiroccia	2.284	30.126	13.19	1	0.078	2.28	17.81	46.33	36.3333	8	44.3333	0.0710154	fertile	5.33333	5.33333
433	e_portosuedda	2	posiroccia	2.284	30.126	13.19	1	0.078	2.28	17.81	46.33	36.3333	8	44.3333	0.0710154	tot	6.00333	6.00333
434	e_portosuedda	2	posiroccia	2.284	30.126	13.19	1	0.078	2.28	17.81	46.33	36.3333	8	44.3333	0.0710154	stockper	35.5358	35.5358
435	e_portosuedda	2	posiroccia	2.284	30.126	13.19	1	0.078	2.28	17.81	46.33	36.3333	8	44.3333	0.0823704	a	0	0
436	e_portosuedda	2	posiroccia	2.284	30.126	13.19	1	0.078	2.28	17.81	46.33	36.3333	8	44.3333	0.0823704	b	0	0
437	e_portosuedda	2	posiroccia	2.284	30.126	13.19	1	0.078	2.28	17.81	46.33	36.3333	8	44.3333	0.0823704	c	0.13	0.13
438	e_portosuedda	2	posiroccia	2.284	30.126	13.19	1	0.078	2.28	17.81	46.33	36.3333	8	44.3333	0.0823704	d	1	1
439	e_portosuedda	2	posiroccia	2.284	30.126	13.19	1	0.078	2.28	17.81	46.33	36.3333	8	44.3333	0.0823704	e	1.53333	1.53333
440	e_portosuedda	2	posiroccia	2.284	30.126	13.19	1	0.078	2.28	17.81	46.33	36.3333	8	44.3333	0.0823704	f	0.933333	0.933333
441	e_portosuedda	2	posiroccia	2.284	30.126	13.19	1	0.078	2.28	17.81	46.33	36.3333	8	44.3333	0.0823704	g	0.2	0.2
442	e_portosuedda	2	posiroccia	2.284	30.126	13.19	1	0.078	2.28	17.81	46.33	36.3333	8	44.3333	0.0823704	rec	0	0
443	e_portosuedda	2	posiroccia	2.284	30.126	13.19	1	0.078	2.28	17.81	46.33	36.3333	8	44.3333	0.0823704	young	2.66333	2.66333
444	e_portosuedda	2	posiroccia	2.284	30.126	13.19	1	0.078	2.28	17.81	46.33	36.3333	8	44.3333	0.0823704	undersize	2.66333	2.66333
445	e_portosuedda	2	posiroccia	2.284	30.126	13.19	1	0.078	2.28	17.81	46.33	36.3333	8	44.3333	0.0823704	stock	1.13333	1.13333
446	e_portosuedda	2	posiroccia	2.284	30.126	13.19	1	0.078	2.28	17.81	46.33	36.3333	8	44.3333	0.0823704	fertile	3.66667	3.66667
447	e_portosuedda	2	posiroccia	2.284	30.126	13.19	1	0.078	2.28	17.81	46.33	36.3333	8	44.3333	0.0823704	tot	3.79667	3.79667
448	e_portosuedda	2	posiroccia	2.284	30.126	13.19	1	0.078	2.28	17.81	46.33	36.3333	8	44.3333	0.0823704	stockper	29.8507	29.8507
449	e_portosuedda	2	calcari	2.548	38.775	15.2178	8	0.624	0.31	16.97	98.92	36.3333	8	44.3333	0.0801504	a	0.93	0.93
450	e_portosuedda	2	calcari	2.548	38.775	15.2178	8	0.624	0.31	16.97	98.92	36.3333	8	44.3333	0.0801504	b	0.93	0.93
451	e_portosuedda	2	calcari	2.548	38.775	15.2178	8	0.624	0.31	16.97	98.92	36.3333	8	44.3333	0.0801504	c	0.73	0.73
452	e_portosuedda	2	calcari	2.548	38.775	15.2178	8	0.624	0.31	16.97	98.92	36.3333	8	44.3333	0.0801504	d	1.2	1.2
453	e_portosuedda	2	calcari	2.548	38.775	15.2178	8	0.624	0.31	16.97	98.92	36.3333	8	44.3333	0.0801504	e	1.13333	1.13333
454	e_portosuedda	2	calcari	2.548	38.775	15.2178	8	0.624	0.31	16.97	98.92	36.3333	8	44.3333	0.0801504	f	2.13333	2.13333
455	e_portosuedda	2	calcari	2.548	38.775	15.2178	8	0.624	0.31	16.97	98.92	36.3333	8	44.3333	0.0801504	g	0.2	0.2
456	e_portosuedda	2	calcari	2.548	38.775	15.2178	8	0.624	0.31	16.97	98.92	36.3333	8	44.3333	0.0801504	rec	1.86	1.86
457	e_portosuedda	2	calcari	2.548	38.775	15.2178	8	0.624	0.31	16.97	98.92	36.3333	8	44.3333	0.0801504	young	3.06333	3.06333
458	e_portosuedda	2	calcari	2.548	38.775	15.2178	8	0.624	0.31	16.97	98.92	36.3333	8	44.3333	0.0801504	undersize	4.92333	4.92333
459	e_portosuedda	2	calcari	2.548	38.775	15.2178	8	0.624	0.31	16.97	98.92	36.3333	8	44.3333	0.0801504	stock	2.33333	2.33333
460	e_portosuedda	2	calcari	2.548	38.775	15.2178	8	0.624	0.31	16.97	98.92	36.3333	8	44.3333	0.0801504	fertile	4.66667	4.66667
461	e_portosuedda	2	calcari	2.548	38.775	15.2178	8	0.624	0.31	16.97	98.92	36.3333	8	44.3333	0.0801504	tot	7.25667	7.25667
462	e_portosuedda	2	calcari	2.548	38.775	15.2178	8	0.624	0.31	16.97	98.92	36.3333	8	44.3333	0.0801504	stockper	32.1543	32.1543
463	e_portosuedda	2	calcari	2.548	38.775	15.2178	8	0.624	0.31	16.97	98.92	36.3333	8	44.3333	0.0778346	a	0.13	0.13
464	e_portosuedda	2	calcari	2.548	38.775	15.2178	8	0.624	0.31	16.97	98.92	36.3333	8	44.3333	0.0778346	b	0.67	0.67
465	e_portosuedda	2	calcari	2.548	38.775	15.2178	8	0.624	0.31	16.97	98.92	36.3333	8	44.3333	0.0778346	c	1.73	1.73
466	e_portosuedda	2	calcari	2.548	38.775	15.2178	8	0.624	0.31	16.97	98.92	36.3333	8	44.3333	0.0778346	d	2.2	2.2
467	e_portosuedda	2	calcari	2.548	38.775	15.2178	8	0.624	0.31	16.97	98.92	36.3333	8	44.3333	0.0778346	e	2.66667	2.66667
468	e_portosuedda	2	calcari	2.548	38.775	15.2178	8	0.624	0.31	16.97	98.92	36.3333	8	44.3333	0.0778346	f	2	2
469	e_portosuedda	2	calcari	2.548	38.775	15.2178	8	0.624	0.31	16.97	98.92	36.3333	8	44.3333	0.0778346	g	0.4	0.4
470	e_portosuedda	2	calcari	2.548	38.775	15.2178	8	0.624	0.31	16.97	98.92	36.3333	8	44.3333	0.0778346	rec	0.8	0.8
471	e_portosuedda	2	calcari	2.548	38.775	15.2178	8	0.624	0.31	16.97	98.92	36.3333	8	44.3333	0.0778346	young	6.59667	6.59667
472	e_portosuedda	2	calcari	2.548	38.775	15.2178	8	0.624	0.31	16.97	98.92	36.3333	8	44.3333	0.0778346	undersize	7.39667	7.39667
473	e_portosuedda	2	calcari	2.548	38.775	15.2178	8	0.624	0.31	16.97	98.92	36.3333	8	44.3333	0.0778346	stock	2.4	2.4
474	e_portosuedda	2	calcari	2.548	38.775	15.2178	8	0.624	0.31	16.97	98.92	36.3333	8	44.3333	0.0778346	fertile	7.26667	7.26667
475	e_portosuedda	2	calcari	2.548	38.775	15.2178	8	0.624	0.31	16.97	98.92	36.3333	8	44.3333	0.0778346	tot	9.79667	9.79667
476	e_portosuedda	2	calcari	2.548	38.775	15.2178	8	0.624	0.31	16.97	98.92	36.3333	8	44.3333	0.0778346	stockper	24.4981	24.4981
477	g_sabenda	2	calcari	2.548	38.775	15.2178	8	0.624	0.31	16.97	98.92	36.3333	8	44.3333	0.0838671	a	0.0666667	0.0666667
478	g_sabenda	2	calcari	2.548	38.775	15.2178	8	0.624	0.31	16.97	98.92	36.3333	8	44.3333	0.0838671	b	1.26667	1.26667
479	g_sabenda	2	calcari	2.548	38.775	15.2178	8	0.624	0.31	16.97	98.92	36.3333	8	44.3333	0.0838671	c	1.53333	1.53333
480	g_sabenda	2	calcari	2.548	38.775	15.2178	8	0.624	0.31	16.97	98.92	36.3333	8	44.3333	0.0838671	d	1.2	1.2
481	g_sabenda	2	calcari	2.548	38.775	15.2178	8	0.624	0.31	16.97	98.92	36.3333	8	44.3333	0.0838671	e	1.73333	1.73333
482	g_sabenda	2	calcari	2.548	38.775	15.2178	8	0.624	0.31	16.97	98.92	36.3333	8	44.3333	0.0838671	f	1.66667	1.66667
483	g_sabenda	2	calcari	2.548	38.775	15.2178	8	0.624	0.31	16.97	98.92	36.3333	8	44.3333	0.0838671	g	0.2	0.2
484	g_sabenda	2	calcari	2.548	38.775	15.2178	8	0.624	0.31	16.97	98.92	36.3333	8	44.3333	0.0838671	rec	1.33333	1.33333
485	g_sabenda	2	calcari	2.548	38.775	15.2178	8	0.624	0.31	16.97	98.92	36.3333	8	44.3333	0.0838671	young	4.46667	4.46667
486	g_sabenda	2	calcari	2.548	38.775	15.2178	8	0.624	0.31	16.97	98.92	36.3333	8	44.3333	0.0838671	undersize	5.8	5.8
487	g_sabenda	2	calcari	2.548	38.775	15.2178	8	0.624	0.31	16.97	98.92	36.3333	8	44.3333	0.0838671	stock	1.86667	1.86667
488	g_sabenda	2	calcari	2.548	38.775	15.2178	8	0.624	0.31	16.97	98.92	36.3333	8	44.3333	0.0838671	fertile	4.8	4.8
489	g_sabenda	2	calcari	2.548	38.775	15.2178	8	0.624	0.31	16.97	98.92	36.3333	8	44.3333	0.0838671	tot	7.66667	7.66667
490	g_sabenda	2	calcari	2.548	38.775	15.2178	8	0.624	0.31	16.97	98.92	36.3333	8	44.3333	0.0838671	stockper	24.3478	24.3478
491	g_sabenda	2	calcari	2.548	38.775	15.2178	8	0.624	0.31	16.97	98.92	16.6667	24.6667	41.3333	0.0711006	a	0.288889	0.288889
492	g_sabenda	2	calcari	2.548	38.775	15.2178	8	0.624	0.31	16.97	98.92	16.6667	24.6667	41.3333	0.0711006	b	2	2
493	g_sabenda	2	calcari	2.548	38.775	15.2178	8	0.624	0.31	16.97	98.92	16.6667	24.6667	41.3333	0.0711006	c	4.465	4.465
494	g_sabenda	2	calcari	2.548	38.775	15.2178	8	0.624	0.31	16.97	98.92	16.6667	24.6667	41.3333	0.0711006	d	1.86667	1.86667
495	g_sabenda	2	calcari	2.548	38.775	15.2178	8	0.624	0.31	16.97	98.92	16.6667	24.6667	41.3333	0.0711006	e	1.46667	1.46667
496	g_sabenda	2	calcari	2.548	38.775	15.2178	8	0.624	0.31	16.97	98.92	16.6667	24.6667	41.3333	0.0711006	f	0.966667	0.966667
497	g_sabenda	2	calcari	2.548	38.775	15.2178	8	0.624	0.31	16.97	98.92	16.6667	24.6667	41.3333	0.0711006	g	0.177778	0.177778
498	g_sabenda	2	calcari	2.548	38.775	15.2178	8	0.624	0.31	16.97	98.92	16.6667	24.6667	41.3333	0.0711006	rec	2.28889	2.28889
499	g_sabenda	2	calcari	2.548	38.775	15.2178	8	0.624	0.31	16.97	98.92	16.6667	24.6667	41.3333	0.0711006	young	7.79833	7.79833
500	g_sabenda	2	calcari	2.548	38.775	15.2178	8	0.624	0.31	16.97	98.92	16.6667	24.6667	41.3333	0.0711006	undersize	10.0872	10.0872
501	g_sabenda	2	calcari	2.548	38.775	15.2178	8	0.624	0.31	16.97	98.92	16.6667	24.6667	41.3333	0.0711006	stock	1.14444	1.14444
502	g_sabenda	2	calcari	2.548	38.775	15.2178	8	0.624	0.31	16.97	98.92	16.6667	24.6667	41.3333	0.0711006	fertile	4.47778	4.47778
503	g_sabenda	2	calcari	2.548	38.775	15.2178	8	0.624	0.31	16.97	98.92	16.6667	24.6667	41.3333	0.0711006	tot	11.2317	11.2317
504	g_sabenda	2	calcari	2.548	38.775	15.2178	8	0.624	0.31	16.97	98.92	33.6667	42.8333	76.5	0.0711006	stockper	10.1894	10.1894
505	h_maimoni	2	posiroccia	2.284	30.126	13.19	1	0.078	2.28	17.81	46.33	47.3333	8.5	55.8333	0.0870694	a	0	0
506	h_maimoni	2	posiroccia	2.284	30.126	13.19	1	0.078	2.28	17.81	46.33	47.3333	8.5	55.8333	0.0870694	b	0.25	0.25
507	h_maimoni	2	posiroccia	2.284	30.126	13.19	1	0.078	2.28	17.81	46.33	47.3333	8.5	55.8333	0.0870694	c	1.25	1.25
508	h_maimoni	2	posiroccia	2.284	30.126	13.19	1	0.078	2.28	17.81	46.33	47.3333	8.5	55.8333	0.0870694	d	1.95	1.95
509	h_maimoni	2	posiroccia	2.284	30.126	13.19	1	0.078	2.28	17.81	46.33	47.3333	8.5	55.8333	0.0870694	e	2.8	2.8
510	h_maimoni	2	posiroccia	2.284	30.126	13.19	1	0.078	2.28	17.81	46.33	47.3333	8.5	55.8333	0.0870694	f	1.55	1.55
511	h_maimoni	2	posiroccia	2.284	30.126	13.19	1	0.078	2.28	17.81	46.33	47.3333	8.5	55.8333	0.0870694	g	0.75	0.75
512	h_maimoni	2	posiroccia	2.284	30.126	13.19	1	0.078	2.28	17.81	46.33	47.3333	8.5	55.8333	0.0870694	rec	0.25	0.25
513	h_maimoni	2	posiroccia	2.284	30.126	13.19	1	0.078	2.28	17.81	46.33	47.3333	8.5	55.8333	0.0870694	young	6	6
514	h_maimoni	2	posiroccia	2.284	30.126	13.19	1	0.078	2.28	17.81	46.33	47.3333	8.5	55.8333	0.0870694	undersize	6.25	6.25
515	h_maimoni	2	posiroccia	2.284	30.126	13.19	1	0.078	2.28	17.81	46.33	47.3333	8.5	55.8333	0.0870694	stock	2.3	2.3
516	h_maimoni	2	posiroccia	2.284	30.126	13.19	1	0.078	2.28	17.81	46.33	47.3333	8.5	55.8333	0.0870694	fertile	7.05	7.05
517	h_maimoni	2	posiroccia	2.284	30.126	13.19	1	0.078	2.28	17.81	46.33	47.3333	8.5	55.8333	0.0870694	tot	8.55	8.55
518	h_maimoni	2	posiroccia	2.284	30.126	13.19	1	0.078	2.28	17.81	46.33	47.3333	8.5	55.8333	0.0870694	stockper	26.9006	26.9006
519	h_maimoni	2	posiroccia	2.284	30.126	13.19	1	0.078	2.28	17.81	46.33	47.3333	8.5	55.8333	0.0842268	a	0	0
520	h_maimoni	2	posiroccia	2.284	30.126	13.19	1	0.078	2.28	17.81	46.33	47.3333	8.5	55.8333	0.0842268	b	0.67	0.67
521	h_maimoni	2	posiroccia	2.284	30.126	13.19	1	0.078	2.28	17.81	46.33	47.3333	8.5	55.8333	0.0842268	c	4	4
522	h_maimoni	2	posiroccia	2.284	30.126	13.19	1	0.078	2.28	17.81	46.33	47.3333	8.5	55.8333	0.0842268	d	4.53333	4.53333
523	h_maimoni	2	posiroccia	2.284	30.126	13.19	1	0.078	2.28	17.81	46.33	47.3333	8.5	55.8333	0.0842268	e	1.93333	1.93333
524	h_maimoni	2	posiroccia	2.284	30.126	13.19	1	0.078	2.28	17.81	46.33	47.3333	8.5	55.8333	0.0842268	f	1.8	1.8
525	h_maimoni	2	posiroccia	2.284	30.126	13.19	1	0.078	2.28	17.81	46.33	47.3333	8.5	55.8333	0.0842268	g	0.466667	0.466667
526	h_maimoni	2	posiroccia	2.284	30.126	13.19	1	0.078	2.28	17.81	46.33	47.3333	8.5	55.8333	0.0842268	rec	0.67	0.67
527	h_maimoni	2	posiroccia	2.284	30.126	13.19	1	0.078	2.28	17.81	46.33	47.3333	8.5	55.8333	0.0842268	young	10.4667	10.4667
528	h_maimoni	2	posiroccia	2.284	30.126	13.19	1	0.078	2.28	17.81	46.33	47.3333	8.5	55.8333	0.0842268	undersize	11.1367	11.1367
529	h_maimoni	2	posiroccia	2.284	30.126	13.19	1	0.078	2.28	17.81	46.33	47.3333	8.5	55.8333	0.0842268	stock	2.26667	2.26667
530	h_maimoni	2	posiroccia	2.284	30.126	13.19	1	0.078	2.28	17.81	46.33	47.3333	8.5	55.8333	0.0842268	fertile	8.73333	8.73333
531	h_maimoni	2	posiroccia	2.284	30.126	13.19	1	0.078	2.28	17.81	46.33	47.3333	8.5	55.8333	0.0842268	tot	13.4033	13.4033
532	h_maimoni	2	posiroccia	2.284	30.126	13.19	1	0.078	2.28	17.81	46.33	47.3333	8.5	55.8333	0.0842268	stockper	16.9112	16.9112
533	i_seu	2	calcari	2.548	38.775	15.2178	8	0.624	0.31	16.97	98.92	47.3333	8.5	55.8333	0.0829522	a	0.2	0.2
534	i_seu	2	calcari	2.548	38.775	15.2178	8	0.624	0.31	16.97	98.92	47.3333	8.5	55.8333	0.0829522	b	0.95	0.95
535	i_seu	2	calcari	2.548	38.775	15.2178	8	0.624	0.31	16.97	98.92	47.3333	8.5	55.8333	0.0829522	c	2.65	2.65
536	i_seu	2	calcari	2.548	38.775	15.2178	8	0.624	0.31	16.97	98.92	47.3333	8.5	55.8333	0.0829522	d	1.9	1.9
537	i_seu	2	calcari	2.548	38.775	15.2178	8	0.624	0.31	16.97	98.92	47.3333	8.5	55.8333	0.0829522	e	4.5	4.5
538	i_seu	2	calcari	2.548	38.775	15.2178	8	0.624	0.31	16.97	98.92	47.3333	8.5	55.8333	0.0829522	f	3.55	3.55
539	i_seu	2	calcari	2.548	38.775	15.2178	8	0.624	0.31	16.97	98.92	47.3333	8.5	55.8333	0.0829522	g	0	0
540	i_seu	2	calcari	2.548	38.775	15.2178	8	0.624	0.31	16.97	98.92	47.3333	8.5	55.8333	0.0829522	rec	1.15	1.15
541	i_seu	2	calcari	2.548	38.775	15.2178	8	0.624	0.31	16.97	98.92	47.3333	8.5	55.8333	0.0829522	young	9.05	9.05
542	i_seu	2	calcari	2.548	38.775	15.2178	8	0.624	0.31	16.97	98.92	47.3333	8.5	55.8333	0.0829522	undersize	10.2	10.2
543	i_seu	2	calcari	2.548	38.775	15.2178	8	0.624	0.31	16.97	98.92	47.3333	8.5	55.8333	0.0829522	stock	3.55	3.55
544	i_seu	2	calcari	2.548	38.775	15.2178	8	0.624	0.31	16.97	98.92	47.3333	8.5	55.8333	0.0829522	fertile	9.95	9.95
545	i_seu	2	calcari	2.548	38.775	15.2178	8	0.624	0.31	16.97	98.92	47.3333	8.5	55.8333	0.0829522	tot	13.75	13.75
546	i_seu	2	calcari	2.548	38.775	15.2178	8	0.624	0.31	16.97	98.92	47.3333	8.5	55.8333	0.0829522	stockper	25.8182	25.8182
547	i_seu	2	calcari	2.548	38.775	15.2178	8	0.624	0.31	16.97	98.92	47.3333	8.5	55.8333	0.124446	a	1.78	1.78
548	i_seu	2	calcari	2.548	38.775	15.2178	8	0.624	0.31	16.97	98.92	47.3333	8.5	55.8333	0.124446	b	3.2	3.2
549	i_seu	2	calcari	2.548	38.775	15.2178	8	0.624	0.31	16.97	98.92	47.3333	8.5	55.8333	0.124446	c	3.65	3.65
550	i_seu	2	calcari	2.548	38.775	15.2178	8	0.624	0.31	16.97	98.92	47.3333	8.5	55.8333	0.124446	d	4.3	4.3
551	i_seu	2	calcari	2.548	38.775	15.2178	8	0.624	0.31	16.97	98.92	47.3333	8.5	55.8333	0.124446	e	6.95	6.95
552	i_seu	2	calcari	2.548	38.775	15.2178	8	0.624	0.31	16.97	98.92	47.3333	8.5	55.8333	0.124446	f	6.6	6.6
553	i_seu	2	calcari	2.548	38.775	15.2178	8	0.624	0.31	16.97	98.92	47.3333	8.5	55.8333	0.124446	g	0.4	0.4
554	i_seu	2	calcari	2.548	38.775	15.2178	8	0.624	0.31	16.97	98.92	47.3333	8.5	55.8333	0.124446	rec	4.98	4.98
555	i_seu	2	calcari	2.548	38.775	15.2178	8	0.624	0.31	16.97	98.92	47.3333	8.5	55.8333	0.124446	young	14.9	14.9
556	i_seu	2	calcari	2.548	38.775	15.2178	8	0.624	0.31	16.97	98.92	47.3333	8.5	55.8333	0.124446	undersize	19.88	19.88
557	i_seu	2	calcari	2.548	38.775	15.2178	8	0.624	0.31	16.97	98.92	47.3333	8.5	55.8333	0.124446	stock	7	7
558	i_seu	2	calcari	2.548	38.775	15.2178	8	0.624	0.31	16.97	98.92	47.3333	8.5	55.8333	0.124446	fertile	18.25	18.25
559	i_seu	2	calcari	2.548	38.775	15.2178	8	0.624	0.31	16.97	98.92	47.3333	8.5	55.8333	0.124446	tot	26.88	26.88
560	i_seu	2	calcari	2.548	38.775	15.2178	8	0.624	0.31	16.97	98.92	47.3333	8.5	55.8333	0.124446	stockper	26.0417	26.0417
561	i_seu	2	calcari	2.548	38.775	15.2178	8	0.624	0.31	16.97	98.92	47.3333	8.5	55.8333	0.130185	a	0	0
562	i_seu	2	calcari	2.548	38.775	15.2178	8	0.624	0.31	16.97	98.92	47.3333	8.5	55.8333	0.130185	b	0.47	0.47
563	i_seu	2	calcari	2.548	38.775	15.2178	8	0.624	0.31	16.97	98.92	47.3333	8.5	55.8333	0.130185	c	0.8	0.8
564	i_seu	2	calcari	2.548	38.775	15.2178	8	0.624	0.31	16.97	98.92	47.3333	8.5	55.8333	0.130185	d	1.6	1.6
565	i_seu	2	calcari	2.548	38.775	15.2178	8	0.624	0.31	16.97	98.92	47.3333	8.5	55.8333	0.130185	e	2.66667	2.66667
566	i_seu	2	calcari	2.548	38.775	15.2178	8	0.624	0.31	16.97	98.92	47.3333	8.5	55.8333	0.130185	f	4.4	4.4
567	i_seu	2	calcari	2.548	38.775	15.2178	8	0.624	0.31	16.97	98.92	47.3333	8.5	55.8333	0.130185	g	0.733333	0.733333
568	i_seu	2	calcari	2.548	38.775	15.2178	8	0.624	0.31	16.97	98.92	47.3333	8.5	55.8333	0.130185	rec	0.47	0.47
569	i_seu	2	calcari	2.548	38.775	15.2178	8	0.624	0.31	16.97	98.92	47.3333	8.5	55.8333	0.130185	young	5.06667	5.06667
570	i_seu	2	calcari	2.548	38.775	15.2178	8	0.624	0.31	16.97	98.92	47.3333	8.5	55.8333	0.130185	undersize	5.53667	5.53667
571	i_seu	2	calcari	2.548	38.775	15.2178	8	0.624	0.31	16.97	98.92	47.3333	8.5	55.8333	0.130185	stock	5.13333	5.13333
572	i_seu	2	calcari	2.548	38.775	15.2178	8	0.624	0.31	16.97	98.92	47.3333	8.5	55.8333	0.130185	fertile	9.4	9.4
573	i_seu	2	calcari	2.548	38.775	15.2178	8	0.624	0.31	16.97	98.92	47.3333	8.5	55.8333	0.130185	tot	10.67	10.67
574	i_seu	2	calcari	2.548	38.775	15.2178	8	0.624	0.31	16.97	98.92	47.3333	8.5	55.8333	0.130185	stockper	48.11	48.11
575	i_seu	2	calcari	2.548	38.775	15.2178	8	0.624	0.31	16.97	98.92	47.3333	8.5	55.8333	0.0820743	a	2.07	2.07
576	i_seu	2	calcari	2.548	38.775	15.2178	8	0.624	0.31	16.97	98.92	47.3333	8.5	55.8333	0.0820743	b	1	1
577	i_seu	2	calcari	2.548	38.775	15.2178	8	0.624	0.31	16.97	98.92	47.3333	8.5	55.8333	0.0820743	c	0.53	0.53
578	i_seu	2	calcari	2.548	38.775	15.2178	8	0.624	0.31	16.97	98.92	47.3333	8.5	55.8333	0.0820743	d	1.26667	1.26667
579	i_seu	2	calcari	2.548	38.775	15.2178	8	0.624	0.31	16.97	98.92	47.3333	8.5	55.8333	0.0820743	e	1.66667	1.66667
580	i_seu	2	calcari	2.548	38.775	15.2178	8	0.624	0.31	16.97	98.92	47.3333	8.5	55.8333	0.0820743	f	3.06667	3.06667
581	i_seu	2	calcari	2.548	38.775	15.2178	8	0.624	0.31	16.97	98.92	47.3333	8.5	55.8333	0.0820743	g	0.4	0.4
582	i_seu	2	calcari	2.548	38.775	15.2178	8	0.624	0.31	16.97	98.92	47.3333	8.5	55.8333	0.0820743	rec	3.07	3.07
583	i_seu	2	calcari	2.548	38.775	15.2178	8	0.624	0.31	16.97	98.92	47.3333	8.5	55.8333	0.0820743	young	3.46333	3.46333
584	i_seu	2	calcari	2.548	38.775	15.2178	8	0.624	0.31	16.97	98.92	47.3333	8.5	55.8333	0.0820743	undersize	6.53333	6.53333
585	i_seu	2	calcari	2.548	38.775	15.2178	8	0.624	0.31	16.97	98.92	47.3333	8.5	55.8333	0.0820743	stock	3.46667	3.46667
586	i_seu	2	calcari	2.548	38.775	15.2178	8	0.624	0.31	16.97	98.92	47.3333	8.5	55.8333	0.0820743	fertile	6.4	6.4
587	i_seu	2	calcari	2.548	38.775	15.2178	8	0.624	0.31	16.97	98.92	47.3333	8.5	55.8333	0.0820743	tot	10	10
588	i_seu	2	calcari	2.548	38.775	15.2178	8	0.624	0.31	16.97	98.92	47.3333	8.5	55.8333	0.0820743	stockper	34.6667	34.6667
589	i_seu	2	calcari	2.548	38.775	15.2178	8	0.624	0.31	16.97	98.92	47.3333	8.5	55.8333	0.106784	a	0.73	0.73
590	i_seu	2	calcari	2.548	38.775	15.2178	8	0.624	0.31	16.97	98.92	47.3333	8.5	55.8333	0.106784	b	1.13	1.13
591	i_seu	2	calcari	2.548	38.775	15.2178	8	0.624	0.31	16.97	98.92	47.3333	8.5	55.8333	0.106784	c	3.13	3.13
592	i_seu	2	calcari	2.548	38.775	15.2178	8	0.624	0.31	16.97	98.92	47.3333	8.5	55.8333	0.106784	d	2.8	2.8
593	i_seu	2	calcari	2.548	38.775	15.2178	8	0.624	0.31	16.97	98.92	47.3333	8.5	55.8333	0.106784	e	3.13333	3.13333
594	i_seu	2	calcari	2.548	38.775	15.2178	8	0.624	0.31	16.97	98.92	47.3333	8.5	55.8333	0.106784	f	1.2	1.2
595	i_seu	2	calcari	2.548	38.775	15.2178	8	0.624	0.31	16.97	98.92	47.3333	8.5	55.8333	0.106784	g	0	0
596	i_seu	2	calcari	2.548	38.775	15.2178	8	0.624	0.31	16.97	98.92	47.3333	8.5	55.8333	0.106784	rec	1.86	1.86
597	i_seu	2	calcari	2.548	38.775	15.2178	8	0.624	0.31	16.97	98.92	47.3333	8.5	55.8333	0.106784	young	9.06333	9.06333
598	i_seu	2	calcari	2.548	38.775	15.2178	8	0.624	0.31	16.97	98.92	47.3333	8.5	55.8333	0.106784	undersize	10.9233	10.9233
599	i_seu	2	calcari	2.548	38.775	15.2178	8	0.624	0.31	16.97	98.92	47.3333	8.5	55.8333	0.106784	stock	1.2	1.2
600	i_seu	2	calcari	2.548	38.775	15.2178	8	0.624	0.31	16.97	98.92	47.3333	8.5	55.8333	0.106784	fertile	7.13333	7.13333
601	i_seu	2	calcari	2.548	38.775	15.2178	8	0.624	0.31	16.97	98.92	47.3333	8.5	55.8333	0.106784	tot	12.1233	12.1233
602	i_seu	2	calcari	2.548	38.775	15.2178	8	0.624	0.31	16.97	98.92	47.3333	8.5	55.8333	0.106784	stockper	9.89827	9.89827
603	i_seu	2	calcari	2.548	38.775	15.2178	8	0.624	0.31	16.97	98.92	47.3333	8.5	55.8333	0.113765	a	0.8	0.8
604	i_seu	2	calcari	2.548	38.775	15.2178	8	0.624	0.31	16.97	98.92	47.3333	8.5	55.8333	0.113765	b	1.87	1.87
605	i_seu	2	calcari	2.548	38.775	15.2178	8	0.624	0.31	16.97	98.92	47.3333	8.5	55.8333	0.113765	c	1.6	1.6
606	i_seu	2	calcari	2.548	38.775	15.2178	8	0.624	0.31	16.97	98.92	47.3333	8.5	55.8333	0.113765	d	0.466667	0.466667
607	i_seu	2	calcari	2.548	38.775	15.2178	8	0.624	0.31	16.97	98.92	47.3333	8.5	55.8333	0.113765	e	0.666667	0.666667
608	i_seu	2	calcari	2.548	38.775	15.2178	8	0.624	0.31	16.97	98.92	47.3333	8.5	55.8333	0.113765	f	1.2	1.2
609	i_seu	2	calcari	2.548	38.775	15.2178	8	0.624	0.31	16.97	98.92	47.3333	8.5	55.8333	0.113765	g	0	0
610	i_seu	2	calcari	2.548	38.775	15.2178	8	0.624	0.31	16.97	98.92	47.3333	8.5	55.8333	0.113765	rec	2.67	2.67
611	i_seu	2	calcari	2.548	38.775	15.2178	8	0.624	0.31	16.97	98.92	47.3333	8.5	55.8333	0.113765	young	2.73333	2.73333
612	i_seu	2	calcari	2.548	38.775	15.2178	8	0.624	0.31	16.97	98.92	47.3333	8.5	55.8333	0.113765	undersize	5.40333	5.40333
613	i_seu	2	calcari	2.548	38.775	15.2178	8	0.624	0.31	16.97	98.92	47.3333	8.5	55.8333	0.113765	stock	1.2	1.2
614	i_seu	2	calcari	2.548	38.775	15.2178	8	0.624	0.31	16.97	98.92	47.3333	8.5	55.8333	0.113765	fertile	2.33333	2.33333
615	i_seu	2	calcari	2.548	38.775	15.2178	8	0.624	0.31	16.97	98.92	47.3333	8.5	55.8333	0.113765	tot	6.60333	6.60333
616	i_seu	2	calcari	2.548	38.775	15.2178	8	0.624	0.31	16.97	98.92	47.3333	8.5	55.8333	0.113765	stockper	18.1726	18.1726
617	i_seu	2	posiroccia	2.284	30.126	13.19	1	0.078	2.28	17.81	46.33	33.6667	42.8333	76.5	0.058948	a	0.022222	0.022222
618	i_seu	2	posiroccia	2.284	30.126	13.19	1	0.078	2.28	17.81	46.33	33.6667	42.8333	76.5	0.058948	b	0.511111	0.511111
619	i_seu	2	posiroccia	2.284	30.126	13.19	1	0.078	2.28	17.81	46.33	33.6667	42.8333	76.5	0.058948	c	1.17778	1.17778
620	i_seu	2	posiroccia	2.284	30.126	13.19	1	0.078	2.28	17.81	46.33	33.6667	42.8333	76.5	0.058948	d	1.57778	1.57778
621	i_seu	2	posiroccia	2.284	30.126	13.19	1	0.078	2.28	17.81	46.33	33.6667	42.8333	76.5	0.058948	e	1.46667	1.46667
622	i_seu	2	posiroccia	2.284	30.126	13.19	1	0.078	2.28	17.81	46.33	33.6667	42.8333	76.5	0.058948	f	0.377778	0.377778
623	i_seu	2	posiroccia	2.284	30.126	13.19	1	0.078	2.28	17.81	46.33	33.6667	42.8333	76.5	0.058948	g	0.0222222	0.0222222
624	i_seu	2	posiroccia	2.284	30.126	13.19	1	0.078	2.28	17.81	46.33	33.6667	42.8333	76.5	0.058948	rec	0.533333	0.533333
625	i_seu	2	posiroccia	2.284	30.126	13.19	1	0.078	2.28	17.81	46.33	33.6667	42.8333	76.5	0.058948	young	4.22222	4.22222
626	i_seu	2	posiroccia	2.284	30.126	13.19	1	0.078	2.28	17.81	46.33	33.6667	42.8333	76.5	0.058948	undersize	4.75556	4.75556
627	i_seu	2	posiroccia	2.284	30.126	13.19	1	0.078	2.28	17.81	46.33	33.6667	42.8333	76.5	0.058948	stock	0.4	0.4
628	i_seu	2	posiroccia	2.284	30.126	13.19	1	0.078	2.28	17.81	46.33	33.6667	42.8333	76.5	0.058948	fertile	3.44444	3.44444
629	i_seu	2	posiroccia	2.284	30.126	13.19	1	0.078	2.28	17.81	46.33	33.6667	42.8333	76.5	0.058948	tot	5.15556	5.15556
630	i_seu	2	posiroccia	2.284	30.126	13.19	1	0.078	2.28	17.81	46.33	33.6667	42.8333	76.5	0.058948	stockper	7.75862	7.75862
631	i_seu	2	calcari	2.548	38.775	15.2178	8	0.624	0.31	16.97	98.92	33.6667	42.8333	76.5	0.119819	a	0.31	0.31
632	i_seu	2	calcari	2.548	38.775	15.2178	8	0.624	0.31	16.97	98.92	33.6667	42.8333	76.5	0.119819	b	0.64	0.64
633	i_seu	2	calcari	2.548	38.775	15.2178	8	0.624	0.31	16.97	98.92	33.6667	42.8333	76.5	0.119819	c	1.27	1.27
634	i_seu	2	calcari	2.548	38.775	15.2178	8	0.624	0.31	16.97	98.92	33.6667	42.8333	76.5	0.119819	d	1.97778	1.97778
635	i_seu	2	calcari	2.548	38.775	15.2178	8	0.624	0.31	16.97	98.92	33.6667	42.8333	76.5	0.119819	e	2.82222	2.82222
636	i_seu	2	calcari	2.548	38.775	15.2178	8	0.624	0.31	16.97	98.92	33.6667	42.8333	76.5	0.119819	f	1.26667	1.26667
637	i_seu	2	calcari	2.548	38.775	15.2178	8	0.624	0.31	16.97	98.92	33.6667	42.8333	76.5	0.119819	g	0.177778	0.177778
638	i_seu	2	calcari	2.548	38.775	15.2178	8	0.624	0.31	16.97	98.92	33.6667	42.8333	76.5	0.119819	rec	0.95	0.95
639	i_seu	2	calcari	2.548	38.775	15.2178	8	0.624	0.31	16.97	98.92	33.6667	42.8333	76.5	0.119819	young	6.07	6.07
640	i_seu	2	calcari	2.548	38.775	15.2178	8	0.624	0.31	16.97	98.92	33.6667	42.8333	76.5	0.119819	undersize	7.02	7.02
641	i_seu	2	calcari	2.548	38.775	15.2178	8	0.624	0.31	16.97	98.92	33.6667	42.8333	76.5	0.119819	stock	1.44444	1.44444
642	i_seu	2	calcari	2.548	38.775	15.2178	8	0.624	0.31	16.97	98.92	33.6667	42.8333	76.5	0.119819	fertile	6.24444	6.24444
643	i_seu	2	calcari	2.548	38.775	15.2178	8	0.624	0.31	16.97	98.92	33.6667	42.8333	76.5	0.119819	tot	8.46444	8.46444
644	i_seu	2	calcari	2.548	38.775	15.2178	8	0.624	0.31	16.97	98.92	33.6667	42.8333	76.5	0.119819	stockper	17.0648	17.0648
645	l_funtanameiga	3	calcari	1.109	16.247	14.6501	6	0.3191	0.17	4.52	44.6	97.3333	12.3333	109.667	0.0436161	a	0.13	0.13
646	l_funtanameiga	3	calcari	1.109	16.247	14.6501	6	0.3191	0.17	4.52	44.6	97.3333	12.3333	109.667	0.0436161	b	1.87	1.87
647	l_funtanameiga	3	calcari	1.109	16.247	14.6501	6	0.3191	0.17	4.52	44.6	97.3333	12.3333	109.667	0.0436161	c	2.07	2.07
648	l_funtanameiga	3	calcari	1.109	16.247	14.6501	6	0.3191	0.17	4.52	44.6	97.3333	12.3333	109.667	0.0436161	d	1.53333	1.53333
649	l_funtanameiga	3	calcari	1.109	16.247	14.6501	6	0.3191	0.17	4.52	44.6	97.3333	12.3333	109.667	0.0436161	e	1.93333	1.93333
650	l_funtanameiga	3	calcari	1.109	16.247	14.6501	6	0.3191	0.17	4.52	44.6	97.3333	12.3333	109.667	0.0436161	f	2	2
651	l_funtanameiga	3	calcari	1.109	16.247	14.6501	6	0.3191	0.17	4.52	44.6	97.3333	12.3333	109.667	0.0436161	g	0.2	0.2
652	l_funtanameiga	3	calcari	1.109	16.247	14.6501	6	0.3191	0.17	4.52	44.6	97.3333	12.3333	109.667	0.0436161	rec	2	2
653	l_funtanameiga	3	calcari	1.109	16.247	14.6501	6	0.3191	0.17	4.52	44.6	97.3333	12.3333	109.667	0.0436161	young	5.53667	5.53667
654	l_funtanameiga	3	calcari	1.109	16.247	14.6501	6	0.3191	0.17	4.52	44.6	97.3333	12.3333	109.667	0.0436161	undersize	7.53667	7.53667
655	l_funtanameiga	3	calcari	1.109	16.247	14.6501	6	0.3191	0.17	4.52	44.6	97.3333	12.3333	109.667	0.0436161	stock	2.2	2.2
656	l_funtanameiga	3	calcari	1.109	16.247	14.6501	6	0.3191	0.17	4.52	44.6	97.3333	12.3333	109.667	0.0436161	fertile	5.66667	5.66667
657	l_funtanameiga	3	calcari	1.109	16.247	14.6501	6	0.3191	0.17	4.52	44.6	97.3333	12.3333	109.667	0.0436161	tot	9.73667	9.73667
658	l_funtanameiga	3	calcari	1.109	16.247	14.6501	6	0.3191	0.17	4.52	44.6	97.3333	12.3333	109.667	0.0436161	stockper	22.595	22.595
659	l_funtanameiga	3	calcari	1.109	16.247	14.6501	6	0.3191	0.17	4.52	44.6	97.3333	12.3333	109.667	0.0454238	a	0.73	0.73
660	l_funtanameiga	3	calcari	1.109	16.247	14.6501	6	0.3191	0.17	4.52	44.6	97.3333	12.3333	109.667	0.0454238	b	1.2	1.2
661	l_funtanameiga	3	calcari	1.109	16.247	14.6501	6	0.3191	0.17	4.52	44.6	97.3333	12.3333	109.667	0.0454238	c	2.33	2.33
662	l_funtanameiga	3	calcari	1.109	16.247	14.6501	6	0.3191	0.17	4.52	44.6	97.3333	12.3333	109.667	0.0454238	d	2.26667	2.26667
663	l_funtanameiga	3	calcari	1.109	16.247	14.6501	6	0.3191	0.17	4.52	44.6	97.3333	12.3333	109.667	0.0454238	e	1.06667	1.06667
664	l_funtanameiga	3	calcari	1.109	16.247	14.6501	6	0.3191	0.17	4.52	44.6	97.3333	12.3333	109.667	0.0454238	f	1.26667	1.26667
665	l_funtanameiga	3	calcari	1.109	16.247	14.6501	6	0.3191	0.17	4.52	44.6	97.3333	12.3333	109.667	0.0454238	g	0.133333	0.133333
666	l_funtanameiga	3	calcari	1.109	16.247	14.6501	6	0.3191	0.17	4.52	44.6	97.3333	12.3333	109.667	0.0454238	rec	1.93	1.93
667	l_funtanameiga	3	calcari	1.109	16.247	14.6501	6	0.3191	0.17	4.52	44.6	97.3333	12.3333	109.667	0.0454238	young	5.66333	5.66333
668	l_funtanameiga	3	calcari	1.109	16.247	14.6501	6	0.3191	0.17	4.52	44.6	97.3333	12.3333	109.667	0.0454238	undersize	7.59333	7.59333
669	l_funtanameiga	3	calcari	1.109	16.247	14.6501	6	0.3191	0.17	4.52	44.6	97.3333	12.3333	109.667	0.0454238	stock	1.4	1.4
670	l_funtanameiga	3	calcari	1.109	16.247	14.6501	6	0.3191	0.17	4.52	44.6	97.3333	12.3333	109.667	0.0454238	fertile	4.73333	4.73333
671	l_funtanameiga	3	calcari	1.109	16.247	14.6501	6	0.3191	0.17	4.52	44.6	97.3333	12.3333	109.667	0.0454238	tot	8.99333	8.99333
672	l_funtanameiga	3	calcari	1.109	16.247	14.6501	6	0.3191	0.17	4.52	44.6	97.3333	12.3333	109.667	0.0454238	stockper	15.5671	15.5671
673	l_funtanameiga	3	calcari	1.109	16.247	14.6501	6	0.3191	0.17	4.52	44.6	97.3333	12.3333	109.667	0.0915166	a	0.93	0.93
674	l_funtanameiga	3	calcari	1.109	16.247	14.6501	6	0.3191	0.17	4.52	44.6	97.3333	12.3333	109.667	0.0915166	b	1.47	1.47
675	l_funtanameiga	3	calcari	1.109	16.247	14.6501	6	0.3191	0.17	4.52	44.6	97.3333	12.3333	109.667	0.0915166	c	2.6	2.6
676	l_funtanameiga	3	calcari	1.109	16.247	14.6501	6	0.3191	0.17	4.52	44.6	97.3333	12.3333	109.667	0.0915166	d	1.26667	1.26667
677	l_funtanameiga	3	calcari	1.109	16.247	14.6501	6	0.3191	0.17	4.52	44.6	97.3333	12.3333	109.667	0.0915166	e	0.866667	0.866667
678	l_funtanameiga	3	calcari	1.109	16.247	14.6501	6	0.3191	0.17	4.52	44.6	97.3333	12.3333	109.667	0.0915166	f	0.8	0.8
679	l_funtanameiga	3	calcari	1.109	16.247	14.6501	6	0.3191	0.17	4.52	44.6	97.3333	12.3333	109.667	0.0915166	g	0.0666667	0.0666667
680	l_funtanameiga	3	calcari	1.109	16.247	14.6501	6	0.3191	0.17	4.52	44.6	97.3333	12.3333	109.667	0.0915166	rec	2.4	2.4
681	l_funtanameiga	3	calcari	1.109	16.247	14.6501	6	0.3191	0.17	4.52	44.6	97.3333	12.3333	109.667	0.0915166	young	4.73333	4.73333
682	l_funtanameiga	3	calcari	1.109	16.247	14.6501	6	0.3191	0.17	4.52	44.6	97.3333	12.3333	109.667	0.0915166	undersize	7.13333	7.13333
683	l_funtanameiga	3	calcari	1.109	16.247	14.6501	6	0.3191	0.17	4.52	44.6	97.3333	12.3333	109.667	0.0915166	stock	0.866667	0.866667
684	l_funtanameiga	3	calcari	1.109	16.247	14.6501	6	0.3191	0.17	4.52	44.6	97.3333	12.3333	109.667	0.0915166	fertile	3	3
685	l_funtanameiga	3	calcari	1.109	16.247	14.6501	6	0.3191	0.17	4.52	44.6	97.3333	12.3333	109.667	0.0915166	tot	8	8
686	l_funtanameiga	3	calcari	1.109	16.247	14.6501	6	0.3191	0.17	4.52	44.6	97.3333	12.3333	109.667	0.0915166	stockper	10.8333	10.8333
687	l_funtanameiga	3	calcari	1.109	16.247	14.6501	6	0.3191	0.17	4.52	44.6	97.3333	12.3333	109.667	0.0439384	a	1.8	1.8
688	l_funtanameiga	3	calcari	1.109	16.247	14.6501	6	0.3191	0.17	4.52	44.6	97.3333	12.3333	109.667	0.0439384	b	4.27	4.27
689	l_funtanameiga	3	calcari	1.109	16.247	14.6501	6	0.3191	0.17	4.52	44.6	97.3333	12.3333	109.667	0.0439384	c	1.73	1.73
690	l_funtanameiga	3	calcari	1.109	16.247	14.6501	6	0.3191	0.17	4.52	44.6	97.3333	12.3333	109.667	0.0439384	d	0.666667	0.666667
691	l_funtanameiga	3	calcari	1.109	16.247	14.6501	6	0.3191	0.17	4.52	44.6	97.3333	12.3333	109.667	0.0439384	e	1.46667	1.46667
692	l_funtanameiga	3	calcari	1.109	16.247	14.6501	6	0.3191	0.17	4.52	44.6	97.3333	12.3333	109.667	0.0439384	f	1.6	1.6
693	l_funtanameiga	3	calcari	1.109	16.247	14.6501	6	0.3191	0.17	4.52	44.6	97.3333	12.3333	109.667	0.0439384	g	0.0666667	0.0666667
694	l_funtanameiga	3	calcari	1.109	16.247	14.6501	6	0.3191	0.17	4.52	44.6	97.3333	12.3333	109.667	0.0439384	rec	6.07	6.07
695	l_funtanameiga	3	calcari	1.109	16.247	14.6501	6	0.3191	0.17	4.52	44.6	97.3333	12.3333	109.667	0.0439384	young	3.86333	3.86333
696	l_funtanameiga	3	calcari	1.109	16.247	14.6501	6	0.3191	0.17	4.52	44.6	97.3333	12.3333	109.667	0.0439384	undersize	9.93333	9.93333
697	l_funtanameiga	3	calcari	1.109	16.247	14.6501	6	0.3191	0.17	4.52	44.6	97.3333	12.3333	109.667	0.0439384	stock	1.66667	1.66667
698	l_funtanameiga	3	calcari	1.109	16.247	14.6501	6	0.3191	0.17	4.52	44.6	97.3333	12.3333	109.667	0.0439384	fertile	3.8	3.8
699	l_funtanameiga	3	calcari	1.109	16.247	14.6501	6	0.3191	0.17	4.52	44.6	97.3333	12.3333	109.667	0.0439384	tot	11.6	11.6
700	l_funtanameiga	3	calcari	1.109	16.247	14.6501	6	0.3191	0.17	4.52	44.6	97.3333	12.3333	109.667	0.0439384	stockper	14.3678	14.3678
701	l_funtanameiga	3	posiroccia	2.013	20.902	10.3835	6	0.3191	0.33	8.2	61.65	97.3333	12.3333	109.667	0.0387597	a	0	0
702	l_funtanameiga	3	posiroccia	2.013	20.902	10.3835	6	0.3191	0.33	8.2	61.65	97.3333	12.3333	109.667	0.0387597	b	0.0666667	0.0666667
703	l_funtanameiga	3	posiroccia	2.013	20.902	10.3835	6	0.3191	0.33	8.2	61.65	97.3333	12.3333	109.667	0.0387597	c	0.4	0.4
704	l_funtanameiga	3	posiroccia	2.013	20.902	10.3835	6	0.3191	0.33	8.2	61.65	97.3333	12.3333	109.667	0.0387597	d	0.133333	0.133333
705	l_funtanameiga	3	posiroccia	2.013	20.902	10.3835	6	0.3191	0.33	8.2	61.65	97.3333	12.3333	109.667	0.0387597	e	0.466667	0.466667
706	l_funtanameiga	3	posiroccia	2.013	20.902	10.3835	6	0.3191	0.33	8.2	61.65	97.3333	12.3333	109.667	0.0387597	f	0.333333	0.333333
707	l_funtanameiga	3	posiroccia	2.013	20.902	10.3835	6	0.3191	0.33	8.2	61.65	97.3333	12.3333	109.667	0.0387597	g	0	0
708	l_funtanameiga	3	posiroccia	2.013	20.902	10.3835	6	0.3191	0.33	8.2	61.65	97.3333	12.3333	109.667	0.0387597	rec	0.0666667	0.0666667
709	l_funtanameiga	3	posiroccia	2.013	20.902	10.3835	6	0.3191	0.33	8.2	61.65	97.3333	12.3333	109.667	0.0387597	young	1	1
710	l_funtanameiga	3	posiroccia	2.013	20.902	10.3835	6	0.3191	0.33	8.2	61.65	97.3333	12.3333	109.667	0.0387597	undersize	1.06667	1.06667
711	l_funtanameiga	3	posiroccia	2.013	20.902	10.3835	6	0.3191	0.33	8.2	61.65	97.3333	12.3333	109.667	0.0387597	stock	0.333333	0.333333
712	l_funtanameiga	3	posiroccia	2.013	20.902	10.3835	6	0.3191	0.33	8.2	61.65	97.3333	12.3333	109.667	0.0387597	fertile	0.933333	0.933333
713	l_funtanameiga	3	posiroccia	2.013	20.902	10.3835	6	0.3191	0.33	8.2	61.65	97.3333	12.3333	109.667	0.0387597	tot	1.4	1.4
714	l_funtanameiga	3	posiroccia	2.013	20.902	10.3835	6	0.3191	0.33	8.2	61.65	97.3333	12.3333	109.667	0.0387597	stockper	23.8095	23.8095
715	l_funtanameiga	3	posiroccia	2.013	20.902	10.3835	6	0.3191	0.33	8.2	61.65	97.3333	12.3333	109.667	0.0889651	a	0.0666667	0.0666667
716	l_funtanameiga	3	posiroccia	2.013	20.902	10.3835	6	0.3191	0.33	8.2	61.65	97.3333	12.3333	109.667	0.0889651	b	0	0
717	l_funtanameiga	3	posiroccia	2.013	20.902	10.3835	6	0.3191	0.33	8.2	61.65	97.3333	12.3333	109.667	0.0889651	c	0.266667	0.266667
718	l_funtanameiga	3	posiroccia	2.013	20.902	10.3835	6	0.3191	0.33	8.2	61.65	97.3333	12.3333	109.667	0.0889651	d	0.4	0.4
719	l_funtanameiga	3	posiroccia	2.013	20.902	10.3835	6	0.3191	0.33	8.2	61.65	97.3333	12.3333	109.667	0.0889651	e	0.6	0.6
720	l_funtanameiga	3	posiroccia	2.013	20.902	10.3835	6	0.3191	0.33	8.2	61.65	97.3333	12.3333	109.667	0.0889651	f	1.2	1.2
721	l_funtanameiga	3	posiroccia	2.013	20.902	10.3835	6	0.3191	0.33	8.2	61.65	97.3333	12.3333	109.667	0.0889651	g	0.333333	0.333333
722	l_funtanameiga	3	posiroccia	2.013	20.902	10.3835	6	0.3191	0.33	8.2	61.65	97.3333	12.3333	109.667	0.0889651	rec	0.0666667	0.0666667
723	l_funtanameiga	3	posiroccia	2.013	20.902	10.3835	6	0.3191	0.33	8.2	61.65	97.3333	12.3333	109.667	0.0889651	young	1.26667	1.26667
724	l_funtanameiga	3	posiroccia	2.013	20.902	10.3835	6	0.3191	0.33	8.2	61.65	97.3333	12.3333	109.667	0.0889651	undersize	1.33333	1.33333
725	l_funtanameiga	3	posiroccia	2.013	20.902	10.3835	6	0.3191	0.33	8.2	61.65	97.3333	12.3333	109.667	0.0889651	stock	1.53333	1.53333
726	l_funtanameiga	3	posiroccia	2.013	20.902	10.3835	6	0.3191	0.33	8.2	61.65	97.3333	12.3333	109.667	0.0889651	fertile	2.53333	2.53333
727	l_funtanameiga	3	posiroccia	2.013	20.902	10.3835	6	0.3191	0.33	8.2	61.65	97.3333	12.3333	109.667	0.0889651	tot	2.86667	2.86667
728	l_funtanameiga	3	posiroccia	2.013	20.902	10.3835	6	0.3191	0.33	8.2	61.65	97.3333	12.3333	109.667	0.0889651	stockper	53.4884	53.4884
729	l_funtanameiga	3	posiroccia	2.013	20.902	10.3835	6	0.3191	0.33	8.2	61.65	97.3333	12.3333	109.667	0.065733	a	0.466667	0.466667
730	l_funtanameiga	3	posiroccia	2.013	20.902	10.3835	6	0.3191	0.33	8.2	61.65	97.3333	12.3333	109.667	0.065733	b	0.6	0.6
731	l_funtanameiga	3	posiroccia	2.013	20.902	10.3835	6	0.3191	0.33	8.2	61.65	97.3333	12.3333	109.667	0.065733	c	1.46667	1.46667
732	l_funtanameiga	3	posiroccia	2.013	20.902	10.3835	6	0.3191	0.33	8.2	61.65	97.3333	12.3333	109.667	0.065733	d	2	2
733	l_funtanameiga	3	posiroccia	2.013	20.902	10.3835	6	0.3191	0.33	8.2	61.65	97.3333	12.3333	109.667	0.065733	e	2.6	2.6
734	l_funtanameiga	3	posiroccia	2.013	20.902	10.3835	6	0.3191	0.33	8.2	61.65	97.3333	12.3333	109.667	0.065733	f	1.33333	1.33333
735	l_funtanameiga	3	posiroccia	2.013	20.902	10.3835	6	0.3191	0.33	8.2	61.65	97.3333	12.3333	109.667	0.065733	g	0.0666667	0.0666667
736	l_funtanameiga	3	posiroccia	2.013	20.902	10.3835	6	0.3191	0.33	8.2	61.65	97.3333	12.3333	109.667	0.065733	rec	1.06667	1.06667
737	l_funtanameiga	3	posiroccia	2.013	20.902	10.3835	6	0.3191	0.33	8.2	61.65	97.3333	12.3333	109.667	0.065733	young	6.06667	6.06667
738	l_funtanameiga	3	posiroccia	2.013	20.902	10.3835	6	0.3191	0.33	8.2	61.65	97.3333	12.3333	109.667	0.065733	undersize	7.13333	7.13333
739	l_funtanameiga	3	posiroccia	2.013	20.902	10.3835	6	0.3191	0.33	8.2	61.65	97.3333	12.3333	109.667	0.065733	stock	1.4	1.4
740	l_funtanameiga	3	posiroccia	2.013	20.902	10.3835	6	0.3191	0.33	8.2	61.65	97.3333	12.3333	109.667	0.065733	fertile	6	6
741	l_funtanameiga	3	posiroccia	2.013	20.902	10.3835	6	0.3191	0.33	8.2	61.65	97.3333	12.3333	109.667	0.065733	tot	8.53333	8.53333
742	l_funtanameiga	3	posiroccia	2.013	20.902	10.3835	6	0.3191	0.33	8.2	61.65	97.3333	12.3333	109.667	0.065733	stockper	16.4062	16.4062
743	l_funtanameiga	3	calcari	1.109	16.247	14.6501	6	0.3191	0.17	4.52	44.6	21.6667	31.6667	53.3333	0.0641361	a	0.87	0.87
744	l_funtanameiga	3	calcari	1.109	16.247	14.6501	6	0.3191	0.17	4.52	44.6	21.6667	31.6667	53.3333	0.0641361	b	3.87	3.87
745	l_funtanameiga	3	calcari	1.109	16.247	14.6501	6	0.3191	0.17	4.52	44.6	21.6667	31.6667	53.3333	0.0641361	c	2.62	2.62
746	l_funtanameiga	3	calcari	1.109	16.247	14.6501	6	0.3191	0.17	4.52	44.6	21.6667	31.6667	53.3333	0.0641361	d	2.44444	2.44444
747	l_funtanameiga	3	calcari	1.109	16.247	14.6501	6	0.3191	0.17	4.52	44.6	21.6667	31.6667	53.3333	0.0641361	e	1.93333	1.93333
748	l_funtanameiga	3	calcari	1.109	16.247	14.6501	6	0.3191	0.17	4.52	44.6	21.6667	31.6667	53.3333	0.0641361	f	0.555556	0.555556
749	l_funtanameiga	3	calcari	1.109	16.247	14.6501	6	0.3191	0.17	4.52	44.6	21.6667	31.6667	53.3333	0.0641361	g	0.0444444	0.0444444
750	l_funtanameiga	3	calcari	1.109	16.247	14.6501	6	0.3191	0.17	4.52	44.6	21.6667	31.6667	53.3333	0.0641361	rec	4.74	4.74
751	l_funtanameiga	3	calcari	1.109	16.247	14.6501	6	0.3191	0.17	4.52	44.6	21.6667	31.6667	53.3333	0.0641361	young	6.99778	6.99778
752	l_funtanameiga	3	calcari	1.109	16.247	14.6501	6	0.3191	0.17	4.52	44.6	21.6667	31.6667	53.3333	0.0641361	undersize	11.7378	11.7378
753	l_funtanameiga	3	calcari	1.109	16.247	14.6501	6	0.3191	0.17	4.52	44.6	21.6667	31.6667	53.3333	0.0641361	stock	0.6	0.6
754	l_funtanameiga	3	calcari	1.109	16.247	14.6501	6	0.3191	0.17	4.52	44.6	21.6667	31.6667	53.3333	0.0641361	fertile	4.97778	4.97778
755	l_funtanameiga	3	calcari	1.109	16.247	14.6501	6	0.3191	0.17	4.52	44.6	21.6667	31.6667	53.3333	0.0641361	tot	12.3378	12.3378
756	l_funtanameiga	3	calcari	1.109	16.247	14.6501	6	0.3191	0.17	4.52	44.6	21.6667	31.6667	53.3333	0.0641361	stockper	4.86311	4.86311
757	l_funtanameiga	3	posiroccia	2.013	20.902	10.3835	6	0.3191	0.33	8.2	61.65	21.6667	31.6667	53.3333	0.0829855	a	0	0
758	l_funtanameiga	3	posiroccia	2.013	20.902	10.3835	6	0.3191	0.33	8.2	61.65	21.6667	31.6667	53.3333	0.0829855	b	0.0666667	0.0666667
759	l_funtanameiga	3	posiroccia	2.013	20.902	10.3835	6	0.3191	0.33	8.2	61.65	21.6667	31.6667	53.3333	0.0829855	c	0.333333	0.333333
760	l_funtanameiga	3	posiroccia	2.013	20.902	10.3835	6	0.3191	0.33	8.2	61.65	21.6667	31.6667	53.3333	0.0829855	d	0.711111	0.711111
761	l_funtanameiga	3	posiroccia	2.013	20.902	10.3835	6	0.3191	0.33	8.2	61.65	21.6667	31.6667	53.3333	0.0829855	e	1.2	1.2
762	l_funtanameiga	3	posiroccia	2.013	20.902	10.3835	6	0.3191	0.33	8.2	61.65	21.6667	31.6667	53.3333	0.0829855	f	1.04444	1.04444
763	l_funtanameiga	3	posiroccia	2.013	20.902	10.3835	6	0.3191	0.33	8.2	61.65	21.6667	31.6667	53.3333	0.0829855	g	0.0888889	0.0888889
764	l_funtanameiga	3	posiroccia	2.013	20.902	10.3835	6	0.3191	0.33	8.2	61.65	21.6667	31.6667	53.3333	0.0829855	rec	0.0666667	0.0666667
765	l_funtanameiga	3	posiroccia	2.013	20.902	10.3835	6	0.3191	0.33	8.2	61.65	21.6667	31.6667	53.3333	0.0829855	young	2.24444	2.24444
766	l_funtanameiga	3	posiroccia	2.013	20.902	10.3835	6	0.3191	0.33	8.2	61.65	21.6667	31.6667	53.3333	0.0829855	undersize	2.31111	2.31111
767	l_funtanameiga	3	posiroccia	2.013	20.902	10.3835	6	0.3191	0.33	8.2	61.65	21.6667	31.6667	53.3333	0.0829855	stock	1.13333	1.13333
768	l_funtanameiga	3	posiroccia	2.013	20.902	10.3835	6	0.3191	0.33	8.2	61.65	21.6667	31.6667	53.3333	0.0829855	fertile	3.04444	3.04444
769	l_funtanameiga	3	posiroccia	2.013	20.902	10.3835	6	0.3191	0.33	8.2	61.65	21.6667	31.6667	53.3333	0.0829855	tot	3.44444	3.44444
770	l_funtanameiga	3	posiroccia	2.013	20.902	10.3835	6	0.3191	0.33	8.2	61.65	21.6667	31.6667	53.3333	0.0829855	stockper	32.9032	32.9032
771	m_sanmarco	3	basalto	14.544	4.125	0.283622	1	0.0532	0.11	0.59	33.92	97.3333	12.3333	109.667	0.0899216	a	0	0
772	m_sanmarco	3	basalto	14.544	4.125	0.283622	1	0.0532	0.11	0.59	33.92	97.3333	12.3333	109.667	0.0899216	b	0	0
773	m_sanmarco	3	basalto	14.544	4.125	0.283622	1	0.0532	0.11	0.59	33.92	97.3333	12.3333	109.667	0.0899216	c	0.0666667	0.0666667
774	m_sanmarco	3	basalto	14.544	4.125	0.283622	1	0.0532	0.11	0.59	33.92	97.3333	12.3333	109.667	0.0899216	d	1.06667	1.06667
775	m_sanmarco	3	basalto	14.544	4.125	0.283622	1	0.0532	0.11	0.59	33.92	97.3333	12.3333	109.667	0.0899216	e	3.66667	3.66667
776	m_sanmarco	3	basalto	14.544	4.125	0.283622	1	0.0532	0.11	0.59	33.92	97.3333	12.3333	109.667	0.0899216	f	5.66667	5.66667
777	m_sanmarco	3	basalto	14.544	4.125	0.283622	1	0.0532	0.11	0.59	33.92	97.3333	12.3333	109.667	0.0899216	g	1.26667	1.26667
778	m_sanmarco	3	basalto	14.544	4.125	0.283622	1	0.0532	0.11	0.59	33.92	97.3333	12.3333	109.667	0.0899216	rec	0	0
779	m_sanmarco	3	basalto	14.544	4.125	0.283622	1	0.0532	0.11	0.59	33.92	97.3333	12.3333	109.667	0.0899216	young	4.8	4.8
780	m_sanmarco	3	basalto	14.544	4.125	0.283622	1	0.0532	0.11	0.59	33.92	97.3333	12.3333	109.667	0.0899216	undersize	4.8	4.8
781	m_sanmarco	3	basalto	14.544	4.125	0.283622	1	0.0532	0.11	0.59	33.92	97.3333	12.3333	109.667	0.0899216	stock	6.93333	6.93333
782	m_sanmarco	3	basalto	14.544	4.125	0.283622	1	0.0532	0.11	0.59	33.92	97.3333	12.3333	109.667	0.0899216	fertile	11.6667	11.6667
783	m_sanmarco	3	basalto	14.544	4.125	0.283622	1	0.0532	0.11	0.59	33.92	97.3333	12.3333	109.667	0.0899216	tot	11.7333	11.7333
784	m_sanmarco	3	basalto	14.544	4.125	0.283622	1	0.0532	0.11	0.59	33.92	97.3333	12.3333	109.667	0.0899216	stockper	59.0909	59.0909
785	m_sanmarco	3	basalto	14.544	4.125	0.283622	1	0.0532	0.11	0.59	33.92	97.3333	12.3333	109.667	0.0852389	a	0	0
786	m_sanmarco	3	basalto	14.544	4.125	0.283622	1	0.0532	0.11	0.59	33.92	97.3333	12.3333	109.667	0.0852389	b	0.1	0.1
787	m_sanmarco	3	basalto	14.544	4.125	0.283622	1	0.0532	0.11	0.59	33.92	97.3333	12.3333	109.667	0.0852389	c	0.2	0.2
788	m_sanmarco	3	basalto	14.544	4.125	0.283622	1	0.0532	0.11	0.59	33.92	97.3333	12.3333	109.667	0.0852389	d	0.4	0.4
789	m_sanmarco	3	basalto	14.544	4.125	0.283622	1	0.0532	0.11	0.59	33.92	97.3333	12.3333	109.667	0.0852389	e	4.2	4.2
790	m_sanmarco	3	basalto	14.544	4.125	0.283622	1	0.0532	0.11	0.59	33.92	97.3333	12.3333	109.667	0.0852389	f	3	3
791	m_sanmarco	3	basalto	14.544	4.125	0.283622	1	0.0532	0.11	0.59	33.92	97.3333	12.3333	109.667	0.0852389	g	1	1
792	m_sanmarco	3	basalto	14.544	4.125	0.283622	1	0.0532	0.11	0.59	33.92	97.3333	12.3333	109.667	0.0852389	rec	0.1	0.1
793	m_sanmarco	3	basalto	14.544	4.125	0.283622	1	0.0532	0.11	0.59	33.92	97.3333	12.3333	109.667	0.0852389	young	4.8	4.8
794	m_sanmarco	3	basalto	14.544	4.125	0.283622	1	0.0532	0.11	0.59	33.92	97.3333	12.3333	109.667	0.0852389	undersize	4.9	4.9
795	m_sanmarco	3	basalto	14.544	4.125	0.283622	1	0.0532	0.11	0.59	33.92	97.3333	12.3333	109.667	0.0852389	stock	4	4
796	m_sanmarco	3	basalto	14.544	4.125	0.283622	1	0.0532	0.11	0.59	33.92	97.3333	12.3333	109.667	0.0852389	fertile	8.6	8.6
797	m_sanmarco	3	basalto	14.544	4.125	0.283622	1	0.0532	0.11	0.59	33.92	97.3333	12.3333	109.667	0.0852389	tot	8.9	8.9
798	m_sanmarco	3	basalto	14.544	4.125	0.283622	1	0.0532	0.11	0.59	33.92	97.3333	12.3333	109.667	0.0852389	stockper	44.9438	44.9438
799	m_sanmarco	3	basalto	14.544	4.125	0.283622	1	0.0532	0.11	0.59	33.92	21.6667	31.6667	53.3333	0.118871	a	0	0
800	m_sanmarco	3	basalto	14.544	4.125	0.283622	1	0.0532	0.11	0.59	33.92	21.6667	31.6667	53.3333	0.118871	b	0.0222222	0.0222222
801	m_sanmarco	3	basalto	14.544	4.125	0.283622	1	0.0532	0.11	0.59	33.92	21.6667	31.6667	53.3333	0.118871	c	0.0666667	0.0666667
802	m_sanmarco	3	basalto	14.544	4.125	0.283622	1	0.0532	0.11	0.59	33.92	21.6667	31.6667	53.3333	0.118871	d	0.222222	0.222222
803	m_sanmarco	3	basalto	14.544	4.125	0.283622	1	0.0532	0.11	0.59	33.92	21.6667	31.6667	53.3333	0.118871	e	0.666667	0.666667
804	m_sanmarco	3	basalto	14.544	4.125	0.283622	1	0.0532	0.11	0.59	33.92	21.6667	31.6667	53.3333	0.118871	f	0.644444	0.644444
805	m_sanmarco	3	basalto	14.544	4.125	0.283622	1	0.0532	0.11	0.59	33.92	21.6667	31.6667	53.3333	0.118871	g	0	0
806	m_sanmarco	3	basalto	14.544	4.125	0.283622	1	0.0532	0.11	0.59	33.92	21.6667	31.6667	53.3333	0.118871	rec	0.0222222	0.0222222
807	m_sanmarco	3	basalto	14.544	4.125	0.283622	1	0.0532	0.11	0.59	33.92	21.6667	31.6667	53.3333	0.118871	young	0.955556	0.955556
808	m_sanmarco	3	basalto	14.544	4.125	0.283622	1	0.0532	0.11	0.59	33.92	21.6667	31.6667	53.3333	0.118871	undersize	0.977778	0.977778
809	m_sanmarco	3	basalto	14.544	4.125	0.283622	1	0.0532	0.11	0.59	33.92	21.6667	31.6667	53.3333	0.118871	stock	0.644444	0.644444
810	m_sanmarco	3	basalto	14.544	4.125	0.283622	1	0.0532	0.11	0.59	33.92	21.6667	31.6667	53.3333	0.118871	fertile	1.53333	1.53333
811	m_sanmarco	3	basalto	14.544	4.125	0.283622	1	0.0532	0.11	0.59	33.92	21.6667	31.6667	53.3333	0.118871	tot	1.62222	1.62222
812	m_sanmarco	3	basalto	14.544	4.125	0.283622	1	0.0532	0.11	0.59	33.92	21.6667	31.6667	53.3333	0.118871	stockper	39.726	39.726
813	m_sanmarco	3	basalto	14.544	4.125	0.283622	1	0.0532	0.11	0.59	33.92	21.6667	31.6667	53.3333	0.074898	a	0.111111	0.111111
814	m_sanmarco	3	basalto	14.544	4.125	0.283622	1	0.0532	0.11	0.59	33.92	21.6667	31.6667	53.3333	0.074898	b	0.0888889	0.0888889
815	m_sanmarco	3	basalto	14.544	4.125	0.283622	1	0.0532	0.11	0.59	33.92	21.6667	31.6667	53.3333	0.074898	c	0.155556	0.155556
816	m_sanmarco	3	basalto	14.544	4.125	0.283622	1	0.0532	0.11	0.59	33.92	21.6667	31.6667	53.3333	0.074898	d	0.488889	0.488889
817	m_sanmarco	3	basalto	14.544	4.125	0.283622	1	0.0532	0.11	0.59	33.92	21.6667	31.6667	53.3333	0.074898	e	1.42222	1.42222
818	m_sanmarco	3	basalto	14.544	4.125	0.283622	1	0.0532	0.11	0.59	33.92	21.6667	31.6667	53.3333	0.074898	f	1.06667	1.06667
819	m_sanmarco	3	basalto	14.544	4.125	0.283622	1	0.0532	0.11	0.59	33.92	21.6667	31.6667	53.3333	0.074898	g	0.111111	0.111111
820	m_sanmarco	3	basalto	14.544	4.125	0.283622	1	0.0532	0.11	0.59	33.92	21.6667	31.6667	53.3333	0.074898	rec	0.2	0.2
821	m_sanmarco	3	basalto	14.544	4.125	0.283622	1	0.0532	0.11	0.59	33.92	21.6667	31.6667	53.3333	0.074898	young	2.06667	2.06667
822	m_sanmarco	3	basalto	14.544	4.125	0.283622	1	0.0532	0.11	0.59	33.92	21.6667	31.6667	53.3333	0.074898	undersize	2.26667	2.26667
823	m_sanmarco	3	basalto	14.544	4.125	0.283622	1	0.0532	0.11	0.59	33.92	21.6667	31.6667	53.3333	0.074898	stock	1.17778	1.17778
824	m_sanmarco	3	basalto	14.544	4.125	0.283622	1	0.0532	0.11	0.59	33.92	21.6667	31.6667	53.3333	0.074898	fertile	3.08889	3.08889
825	m_sanmarco	3	basalto	14.544	4.125	0.283622	1	0.0532	0.11	0.59	33.92	21.6667	31.6667	53.3333	0.074898	tot	3.44444	3.44444
826	m_sanmarco	3	basalto	14.544	4.125	0.283622	1	0.0532	0.11	0.59	33.92	21.6667	31.6667	53.3333	0.074898	stockper	34.1935	34.1935
827	n_maldiventre	4	granito	1.85178	30.341	16.3848	1	0.0157	1.85	2.91	62.74	78.3333	48.1667	126.5	0.0808828	a	0.13	0.13
828	n_maldiventre	4	granito	1.85178	30.341	16.3848	1	0.0157	1.85	2.91	62.74	78.3333	48.1667	126.5	0.0808828	b	2.27	2.27
829	n_maldiventre	4	granito	1.85178	30.341	16.3848	1	0.0157	1.85	2.91	62.74	78.3333	48.1667	126.5	0.0808828	c	2	2
830	n_maldiventre	4	granito	1.85178	30.341	16.3848	1	0.0157	1.85	2.91	62.74	78.3333	48.1667	126.5	0.0808828	d	2	2
831	n_maldiventre	4	granito	1.85178	30.341	16.3848	1	0.0157	1.85	2.91	62.74	78.3333	48.1667	126.5	0.0808828	e	5.66667	5.66667
832	n_maldiventre	4	granito	1.85178	30.341	16.3848	1	0.0157	1.85	2.91	62.74	78.3333	48.1667	126.5	0.0808828	f	5.8	5.8
833	n_maldiventre	4	granito	1.85178	30.341	16.3848	1	0.0157	1.85	2.91	62.74	78.3333	48.1667	126.5	0.0808828	g	1.06667	1.06667
834	n_maldiventre	4	granito	1.85178	30.341	16.3848	1	0.0157	1.85	2.91	62.74	78.3333	48.1667	126.5	0.0808828	rec	2.4	2.4
835	n_maldiventre	4	granito	1.85178	30.341	16.3848	1	0.0157	1.85	2.91	62.74	78.3333	48.1667	126.5	0.0808828	young	9.66667	9.66667
836	n_maldiventre	4	granito	1.85178	30.341	16.3848	1	0.0157	1.85	2.91	62.74	78.3333	48.1667	126.5	0.0808828	undersize	12.0667	12.0667
837	n_maldiventre	4	granito	1.85178	30.341	16.3848	1	0.0157	1.85	2.91	62.74	78.3333	48.1667	126.5	0.0808828	stock	6.86667	6.86667
838	n_maldiventre	4	granito	1.85178	30.341	16.3848	1	0.0157	1.85	2.91	62.74	78.3333	48.1667	126.5	0.0808828	fertile	14.5333	14.5333
839	n_maldiventre	4	granito	1.85178	30.341	16.3848	1	0.0157	1.85	2.91	62.74	78.3333	48.1667	126.5	0.0808828	tot	18.9333	18.9333
840	n_maldiventre	4	granito	1.85178	30.341	16.3848	1	0.0157	1.85	2.91	62.74	78.3333	48.1667	126.5	0.0808828	stockper	36.2676	36.2676
841	n_maldiventre	4	granito	1.85178	30.341	16.3848	1	0.0157	1.85	2.91	62.74	83	24.1667	107.167	0.115395	a	0.53	0.53
842	n_maldiventre	4	granito	1.85178	30.341	16.3848	1	0.0157	1.85	2.91	62.74	83	24.1667	107.167	0.115395	b	2.13	2.13
843	n_maldiventre	4	granito	1.85178	30.341	16.3848	1	0.0157	1.85	2.91	62.74	83	24.1667	107.167	0.115395	c	0.93	0.93
844	n_maldiventre	4	granito	1.85178	30.341	16.3848	1	0.0157	1.85	2.91	62.74	83	24.1667	107.167	0.115395	d	0.133333	0.133333
845	n_maldiventre	4	granito	1.85178	30.341	16.3848	1	0.0157	1.85	2.91	62.74	83	24.1667	107.167	0.115395	e	0.733333	0.733333
846	n_maldiventre	4	granito	1.85178	30.341	16.3848	1	0.0157	1.85	2.91	62.74	83	24.1667	107.167	0.115395	f	2.33333	2.33333
847	n_maldiventre	4	granito	1.85178	30.341	16.3848	1	0.0157	1.85	2.91	62.74	83	24.1667	107.167	0.115395	g	1	1
848	n_maldiventre	4	granito	1.85178	30.341	16.3848	1	0.0157	1.85	2.91	62.74	83	24.1667	107.167	0.115395	rec	2.66	2.66
849	n_maldiventre	4	granito	1.85178	30.341	16.3848	1	0.0157	1.85	2.91	62.74	83	24.1667	107.167	0.115395	young	1.79667	1.79667
850	n_maldiventre	4	granito	1.85178	30.341	16.3848	1	0.0157	1.85	2.91	62.74	83	24.1667	107.167	0.115395	undersize	4.45667	4.45667
851	n_maldiventre	4	granito	1.85178	30.341	16.3848	1	0.0157	1.85	2.91	62.74	83	24.1667	107.167	0.115395	stock	3.33333	3.33333
852	n_maldiventre	4	granito	1.85178	30.341	16.3848	1	0.0157	1.85	2.91	62.74	83	24.1667	107.167	0.115395	fertile	4.2	4.2
853	n_maldiventre	4	granito	1.85178	30.341	16.3848	1	0.0157	1.85	2.91	62.74	83	24.1667	107.167	0.115395	tot	7.79	7.79
854	n_maldiventre	4	granito	1.85178	30.341	16.3848	1	0.0157	1.85	2.91	62.74	83	24.1667	107.167	0.115395	stockper	42.7899	42.7899
855	n_maldiventre	4	granito	1.85178	30.341	16.3848	1	0.0157	1.85	2.91	62.74	83	24.1667	107.167	0.124554	a	1.73	1.73
856	n_maldiventre	4	granito	1.85178	30.341	16.3848	1	0.0157	1.85	2.91	62.74	83	24.1667	107.167	0.124554	b	2.93	2.93
857	n_maldiventre	4	granito	1.85178	30.341	16.3848	1	0.0157	1.85	2.91	62.74	83	24.1667	107.167	0.124554	c	0.2	0.2
858	n_maldiventre	4	granito	1.85178	30.341	16.3848	1	0.0157	1.85	2.91	62.74	83	24.1667	107.167	0.124554	d	0.333333	0.333333
859	n_maldiventre	4	granito	1.85178	30.341	16.3848	1	0.0157	1.85	2.91	62.74	83	24.1667	107.167	0.124554	e	1	1
860	n_maldiventre	4	granito	1.85178	30.341	16.3848	1	0.0157	1.85	2.91	62.74	83	24.1667	107.167	0.124554	f	4.93333	4.93333
861	n_maldiventre	4	granito	1.85178	30.341	16.3848	1	0.0157	1.85	2.91	62.74	83	24.1667	107.167	0.124554	g	1.46667	1.46667
862	n_maldiventre	4	granito	1.85178	30.341	16.3848	1	0.0157	1.85	2.91	62.74	83	24.1667	107.167	0.124554	rec	4.66	4.66
863	n_maldiventre	4	granito	1.85178	30.341	16.3848	1	0.0157	1.85	2.91	62.74	83	24.1667	107.167	0.124554	young	1.53333	1.53333
864	n_maldiventre	4	granito	1.85178	30.341	16.3848	1	0.0157	1.85	2.91	62.74	83	24.1667	107.167	0.124554	undersize	6.19333	6.19333
865	n_maldiventre	4	granito	1.85178	30.341	16.3848	1	0.0157	1.85	2.91	62.74	83	24.1667	107.167	0.124554	stock	6.4	6.4
866	n_maldiventre	4	granito	1.85178	30.341	16.3848	1	0.0157	1.85	2.91	62.74	83	24.1667	107.167	0.124554	fertile	7.73333	7.73333
867	n_maldiventre	4	granito	1.85178	30.341	16.3848	1	0.0157	1.85	2.91	62.74	83	24.1667	107.167	0.124554	tot	12.5933	12.5933
868	n_maldiventre	4	granito	1.85178	30.341	16.3848	1	0.0157	1.85	2.91	62.74	83	24.1667	107.167	0.124554	stockper	50.8205	50.8205
869	n_maldiventre	4	granito	1.85178	30.341	16.3848	1	0.0157	1.85	2.91	62.74	83	24.1667	107.167	0.123559	a	0.07	0.07
870	n_maldiventre	4	granito	1.85178	30.341	16.3848	1	0.0157	1.85	2.91	62.74	83	24.1667	107.167	0.123559	b	3.93	3.93
871	n_maldiventre	4	granito	1.85178	30.341	16.3848	1	0.0157	1.85	2.91	62.74	83	24.1667	107.167	0.123559	c	1.07	1.07
872	n_maldiventre	4	granito	1.85178	30.341	16.3848	1	0.0157	1.85	2.91	62.74	83	24.1667	107.167	0.123559	d	0.466667	0.466667
873	n_maldiventre	4	granito	1.85178	30.341	16.3848	1	0.0157	1.85	2.91	62.74	83	24.1667	107.167	0.123559	e	0.933333	0.933333
874	n_maldiventre	4	granito	1.85178	30.341	16.3848	1	0.0157	1.85	2.91	62.74	83	24.1667	107.167	0.123559	f	2.46667	2.46667
875	n_maldiventre	4	granito	1.85178	30.341	16.3848	1	0.0157	1.85	2.91	62.74	83	24.1667	107.167	0.123559	g	0.666667	0.666667
876	n_maldiventre	4	granito	1.85178	30.341	16.3848	1	0.0157	1.85	2.91	62.74	83	24.1667	107.167	0.123559	rec	4	4
877	n_maldiventre	4	granito	1.85178	30.341	16.3848	1	0.0157	1.85	2.91	62.74	83	24.1667	107.167	0.123559	young	2.47	2.47
878	n_maldiventre	4	granito	1.85178	30.341	16.3848	1	0.0157	1.85	2.91	62.74	83	24.1667	107.167	0.123559	undersize	6.47	6.47
879	n_maldiventre	4	granito	1.85178	30.341	16.3848	1	0.0157	1.85	2.91	62.74	83	24.1667	107.167	0.123559	stock	3.13333	3.13333
880	n_maldiventre	4	granito	1.85178	30.341	16.3848	1	0.0157	1.85	2.91	62.74	83	24.1667	107.167	0.123559	fertile	4.53333	4.53333
881	n_maldiventre	4	granito	1.85178	30.341	16.3848	1	0.0157	1.85	2.91	62.74	83	24.1667	107.167	0.123559	tot	9.60333	9.60333
882	n_maldiventre	4	granito	1.85178	30.341	16.3848	1	0.0157	1.85	2.91	62.74	83	24.1667	107.167	0.123559	stockper	32.6276	32.6276
883	n_maldiventre	4	granito	1.85178	30.341	16.3848	1	0.0157	1.85	2.91	62.74	78.3333	48.1667	126.5	0.091169	a	2.6	2.6
884	n_maldiventre	4	granito	1.85178	30.341	16.3848	1	0.0157	1.85	2.91	62.74	78.3333	48.1667	126.5	0.091169	b	1.6	1.6
885	n_maldiventre	4	granito	1.85178	30.341	16.3848	1	0.0157	1.85	2.91	62.74	78.3333	48.1667	126.5	0.091169	c	0.53	0.53
886	n_maldiventre	4	granito	1.85178	30.341	16.3848	1	0.0157	1.85	2.91	62.74	78.3333	48.1667	126.5	0.091169	d	0.866667	0.866667
887	n_maldiventre	4	granito	1.85178	30.341	16.3848	1	0.0157	1.85	2.91	62.74	78.3333	48.1667	126.5	0.091169	e	1.6	1.6
888	n_maldiventre	4	granito	1.85178	30.341	16.3848	1	0.0157	1.85	2.91	62.74	78.3333	48.1667	126.5	0.091169	f	4.13333	4.13333
889	n_maldiventre	4	granito	1.85178	30.341	16.3848	1	0.0157	1.85	2.91	62.74	78.3333	48.1667	126.5	0.091169	g	0.533333	0.533333
890	n_maldiventre	4	granito	1.85178	30.341	16.3848	1	0.0157	1.85	2.91	62.74	78.3333	48.1667	126.5	0.091169	rec	4.2	4.2
891	n_maldiventre	4	granito	1.85178	30.341	16.3848	1	0.0157	1.85	2.91	62.74	78.3333	48.1667	126.5	0.091169	young	2.99667	2.99667
892	n_maldiventre	4	granito	1.85178	30.341	16.3848	1	0.0157	1.85	2.91	62.74	78.3333	48.1667	126.5	0.091169	undersize	7.19667	7.19667
893	n_maldiventre	4	granito	1.85178	30.341	16.3848	1	0.0157	1.85	2.91	62.74	78.3333	48.1667	126.5	0.091169	stock	4.66667	4.66667
894	n_maldiventre	4	granito	1.85178	30.341	16.3848	1	0.0157	1.85	2.91	62.74	78.3333	48.1667	126.5	0.091169	fertile	7.13333	7.13333
895	n_maldiventre	4	granito	1.85178	30.341	16.3848	1	0.0157	1.85	2.91	62.74	78.3333	48.1667	126.5	0.091169	tot	11.8633	11.8633
896	n_maldiventre	4	granito	1.85178	30.341	16.3848	1	0.0157	1.85	2.91	62.74	78.3333	48.1667	126.5	0.091169	stockper	39.3369	39.3369
897	n_maldiventre	4	granito	1.85178	30.341	16.3848	1	0.0157	1.85	2.91	62.74	68.8333	24.8333	93.6667	0.118817	a	3.33	3.33
898	n_maldiventre	4	granito	1.85178	30.341	16.3848	1	0.0157	1.85	2.91	62.74	68.8333	24.8333	93.6667	0.118817	b	2.6	2.6
899	n_maldiventre	4	granito	1.85178	30.341	16.3848	1	0.0157	1.85	2.91	62.74	68.8333	24.8333	93.6667	0.118817	c	0.33	0.33
900	n_maldiventre	4	granito	1.85178	30.341	16.3848	1	0.0157	1.85	2.91	62.74	68.8333	24.8333	93.6667	0.118817	d	0.466667	0.466667
901	n_maldiventre	4	granito	1.85178	30.341	16.3848	1	0.0157	1.85	2.91	62.74	68.8333	24.8333	93.6667	0.118817	e	0.8	0.8
902	n_maldiventre	4	granito	1.85178	30.341	16.3848	1	0.0157	1.85	2.91	62.74	68.8333	24.8333	93.6667	0.118817	f	3.4	3.4
903	n_maldiventre	4	granito	1.85178	30.341	16.3848	1	0.0157	1.85	2.91	62.74	68.8333	24.8333	93.6667	0.118817	g	2	2
904	n_maldiventre	4	granito	1.85178	30.341	16.3848	1	0.0157	1.85	2.91	62.74	68.8333	24.8333	93.6667	0.118817	rec	5.93	5.93
905	n_maldiventre	4	granito	1.85178	30.341	16.3848	1	0.0157	1.85	2.91	62.74	68.8333	24.8333	93.6667	0.118817	young	1.59667	1.59667
906	n_maldiventre	4	granito	1.85178	30.341	16.3848	1	0.0157	1.85	2.91	62.74	68.8333	24.8333	93.6667	0.118817	undersize	7.52667	7.52667
907	n_maldiventre	4	granito	1.85178	30.341	16.3848	1	0.0157	1.85	2.91	62.74	68.8333	24.8333	93.6667	0.118817	stock	5.4	5.4
908	n_maldiventre	4	granito	1.85178	30.341	16.3848	1	0.0157	1.85	2.91	62.74	68.8333	24.8333	93.6667	0.118817	fertile	6.66667	6.66667
909	n_maldiventre	4	granito	1.85178	30.341	16.3848	1	0.0157	1.85	2.91	62.74	68.8333	24.8333	93.6667	0.118817	tot	12.9267	12.9267
910	n_maldiventre	4	granito	1.85178	30.341	16.3848	1	0.0157	1.85	2.91	62.74	68.8333	24.8333	93.6667	0.118817	stockper	41.7741	41.7741
911	n_maldiventre	4	granito	1.85178	30.341	16.3848	1	0.0157	1.85	2.91	62.74	68.8333	24.8333	93.6667	0.0719027	a	4.27	4.27
912	n_maldiventre	4	granito	1.85178	30.341	16.3848	1	0.0157	1.85	2.91	62.74	68.8333	24.8333	93.6667	0.0719027	b	1.87	1.87
913	n_maldiventre	4	granito	1.85178	30.341	16.3848	1	0.0157	1.85	2.91	62.74	68.8333	24.8333	93.6667	0.0719027	c	0.93	0.93
914	n_maldiventre	4	granito	1.85178	30.341	16.3848	1	0.0157	1.85	2.91	62.74	68.8333	24.8333	93.6667	0.0719027	d	0.133333	0.133333
915	n_maldiventre	4	granito	1.85178	30.341	16.3848	1	0.0157	1.85	2.91	62.74	68.8333	24.8333	93.6667	0.0719027	e	1.46667	1.46667
916	n_maldiventre	4	granito	1.85178	30.341	16.3848	1	0.0157	1.85	2.91	62.74	68.8333	24.8333	93.6667	0.0719027	f	4.33333	4.33333
917	n_maldiventre	4	granito	1.85178	30.341	16.3848	1	0.0157	1.85	2.91	62.74	68.8333	24.8333	93.6667	0.0719027	g	1.26667	1.26667
918	n_maldiventre	4	granito	1.85178	30.341	16.3848	1	0.0157	1.85	2.91	62.74	68.8333	24.8333	93.6667	0.0719027	rec	6.14	6.14
919	n_maldiventre	4	granito	1.85178	30.341	16.3848	1	0.0157	1.85	2.91	62.74	68.8333	24.8333	93.6667	0.0719027	young	2.53	2.53
920	n_maldiventre	4	granito	1.85178	30.341	16.3848	1	0.0157	1.85	2.91	62.74	68.8333	24.8333	93.6667	0.0719027	undersize	8.67	8.67
921	n_maldiventre	4	granito	1.85178	30.341	16.3848	1	0.0157	1.85	2.91	62.74	68.8333	24.8333	93.6667	0.0719027	stock	5.6	5.6
922	n_maldiventre	4	granito	1.85178	30.341	16.3848	1	0.0157	1.85	2.91	62.74	68.8333	24.8333	93.6667	0.0719027	fertile	7.2	7.2
923	n_maldiventre	4	granito	1.85178	30.341	16.3848	1	0.0157	1.85	2.91	62.74	68.8333	24.8333	93.6667	0.0719027	tot	14.27	14.27
924	n_maldiventre	4	granito	1.85178	30.341	16.3848	1	0.0157	1.85	2.91	62.74	68.8333	24.8333	93.6667	0.0719027	stockper	39.2432	39.2432
925	n_maldiventre	4	granito	1.85178	30.341	16.3848	1	0.0157	1.85	2.91	62.74	68.8333	24.8333	93.6667	0.0874022	a	4.47	4.47
926	n_maldiventre	4	granito	1.85178	30.341	16.3848	1	0.0157	1.85	2.91	62.74	68.8333	24.8333	93.6667	0.0874022	b	3.73	3.73
927	n_maldiventre	4	granito	1.85178	30.341	16.3848	1	0.0157	1.85	2.91	62.74	68.8333	24.8333	93.6667	0.0874022	c	0.67	0.67
928	n_maldiventre	4	granito	1.85178	30.341	16.3848	1	0.0157	1.85	2.91	62.74	68.8333	24.8333	93.6667	0.0874022	d	0	0
929	n_maldiventre	4	granito	1.85178	30.341	16.3848	1	0.0157	1.85	2.91	62.74	68.8333	24.8333	93.6667	0.0874022	e	0.266667	0.266667
930	n_maldiventre	4	granito	1.85178	30.341	16.3848	1	0.0157	1.85	2.91	62.74	68.8333	24.8333	93.6667	0.0874022	f	0.866667	0.866667
931	n_maldiventre	4	granito	1.85178	30.341	16.3848	1	0.0157	1.85	2.91	62.74	68.8333	24.8333	93.6667	0.0874022	g	0.8	0.8
932	n_maldiventre	4	granito	1.85178	30.341	16.3848	1	0.0157	1.85	2.91	62.74	68.8333	24.8333	93.6667	0.0874022	rec	8.2	8.2
933	n_maldiventre	4	granito	1.85178	30.341	16.3848	1	0.0157	1.85	2.91	62.74	68.8333	24.8333	93.6667	0.0874022	young	0.936667	0.936667
934	n_maldiventre	4	granito	1.85178	30.341	16.3848	1	0.0157	1.85	2.91	62.74	68.8333	24.8333	93.6667	0.0874022	undersize	9.13667	9.13667
935	n_maldiventre	4	granito	1.85178	30.341	16.3848	1	0.0157	1.85	2.91	62.74	68.8333	24.8333	93.6667	0.0874022	stock	1.66667	1.66667
936	n_maldiventre	4	granito	1.85178	30.341	16.3848	1	0.0157	1.85	2.91	62.74	68.8333	24.8333	93.6667	0.0874022	fertile	1.93333	1.93333
937	n_maldiventre	4	granito	1.85178	30.341	16.3848	1	0.0157	1.85	2.91	62.74	68.8333	24.8333	93.6667	0.0874022	tot	10.8033	10.8033
938	n_maldiventre	4	granito	1.85178	30.341	16.3848	1	0.0157	1.85	2.91	62.74	68.8333	24.8333	93.6667	0.0874022	stockper	15.4273	15.4273
939	n_maldiventre	4	granito	1.85178	30.341	16.3848	1	0.0157	1.85	2.91	62.74	78.3333	48.1667	126.5	0.0673864	a	1.27	1.27
940	n_maldiventre	4	granito	1.85178	30.341	16.3848	1	0.0157	1.85	2.91	62.74	78.3333	48.1667	126.5	0.0673864	b	2.2	2.2
941	n_maldiventre	4	granito	1.85178	30.341	16.3848	1	0.0157	1.85	2.91	62.74	78.3333	48.1667	126.5	0.0673864	c	0.73	0.73
942	n_maldiventre	4	granito	1.85178	30.341	16.3848	1	0.0157	1.85	2.91	62.74	78.3333	48.1667	126.5	0.0673864	d	1.13333	1.13333
943	n_maldiventre	4	granito	1.85178	30.341	16.3848	1	0.0157	1.85	2.91	62.74	78.3333	48.1667	126.5	0.0673864	e	0.6	0.6
944	n_maldiventre	4	granito	1.85178	30.341	16.3848	1	0.0157	1.85	2.91	62.74	78.3333	48.1667	126.5	0.0673864	f	0.6	0.6
945	n_maldiventre	4	granito	1.85178	30.341	16.3848	1	0.0157	1.85	2.91	62.74	78.3333	48.1667	126.5	0.0673864	g	0.133333	0.133333
946	n_maldiventre	4	granito	1.85178	30.341	16.3848	1	0.0157	1.85	2.91	62.74	78.3333	48.1667	126.5	0.0673864	rec	3.47	3.47
947	n_maldiventre	4	granito	1.85178	30.341	16.3848	1	0.0157	1.85	2.91	62.74	78.3333	48.1667	126.5	0.0673864	young	2.46333	2.46333
948	n_maldiventre	4	granito	1.85178	30.341	16.3848	1	0.0157	1.85	2.91	62.74	78.3333	48.1667	126.5	0.0673864	undersize	5.93333	5.93333
949	n_maldiventre	4	granito	1.85178	30.341	16.3848	1	0.0157	1.85	2.91	62.74	78.3333	48.1667	126.5	0.0673864	stock	0.733333	0.733333
950	n_maldiventre	4	granito	1.85178	30.341	16.3848	1	0.0157	1.85	2.91	62.74	78.3333	48.1667	126.5	0.0673864	fertile	2.46667	2.46667
951	n_maldiventre	4	granito	1.85178	30.341	16.3848	1	0.0157	1.85	2.91	62.74	78.3333	48.1667	126.5	0.0673864	tot	6.66667	6.66667
952	n_maldiventre	4	granito	1.85178	30.341	16.3848	1	0.0157	1.85	2.91	62.74	78.3333	48.1667	126.5	0.0673864	stockper	11	11
953	n_maldiventre	4	granito	1.85178	30.341	16.3848	1	0.0157	1.85	2.91	62.74	78.3333	48.1667	126.5	0.101721	a	7.47	7.47
954	n_maldiventre	4	granito	1.85178	30.341	16.3848	1	0.0157	1.85	2.91	62.74	78.3333	48.1667	126.5	0.101721	b	6.93	6.93
955	n_maldiventre	4	granito	1.85178	30.341	16.3848	1	0.0157	1.85	2.91	62.74	78.3333	48.1667	126.5	0.101721	c	0.87	0.87
956	n_maldiventre	4	granito	1.85178	30.341	16.3848	1	0.0157	1.85	2.91	62.74	78.3333	48.1667	126.5	0.101721	d	1.06667	1.06667
957	n_maldiventre	4	granito	1.85178	30.341	16.3848	1	0.0157	1.85	2.91	62.74	78.3333	48.1667	126.5	0.101721	e	0.466667	0.466667
958	n_maldiventre	4	granito	1.85178	30.341	16.3848	1	0.0157	1.85	2.91	62.74	78.3333	48.1667	126.5	0.101721	f	0.8	0.8
959	n_maldiventre	4	granito	1.85178	30.341	16.3848	1	0.0157	1.85	2.91	62.74	78.3333	48.1667	126.5	0.101721	g	0.2	0.2
960	n_maldiventre	4	granito	1.85178	30.341	16.3848	1	0.0157	1.85	2.91	62.74	78.3333	48.1667	126.5	0.101721	rec	14.4	14.4
961	n_maldiventre	4	granito	1.85178	30.341	16.3848	1	0.0157	1.85	2.91	62.74	78.3333	48.1667	126.5	0.101721	young	2.40333	2.40333
962	n_maldiventre	4	granito	1.85178	30.341	16.3848	1	0.0157	1.85	2.91	62.74	78.3333	48.1667	126.5	0.101721	undersize	16.8033	16.8033
963	n_maldiventre	4	granito	1.85178	30.341	16.3848	1	0.0157	1.85	2.91	62.74	78.3333	48.1667	126.5	0.101721	stock	1	1
964	n_maldiventre	4	granito	1.85178	30.341	16.3848	1	0.0157	1.85	2.91	62.74	78.3333	48.1667	126.5	0.101721	fertile	2.53333	2.53333
965	n_maldiventre	4	granito	1.85178	30.341	16.3848	1	0.0157	1.85	2.91	62.74	78.3333	48.1667	126.5	0.101721	tot	17.8033	17.8033
966	n_maldiventre	4	granito	1.85178	30.341	16.3848	1	0.0157	1.85	2.91	62.74	78.3333	48.1667	126.5	0.101721	stockper	5.61693	5.61693
967	n_maldiventre	4	granito	1.85178	30.341	16.3848	1	0.0157	1.85	2.91	62.74	23.5	17.6667	41.1667	0.120331	a	0.044444	0.044444
968	n_maldiventre	4	granito	1.85178	30.341	16.3848	1	0.0157	1.85	2.91	62.74	23.5	17.6667	41.1667	0.120331	b	1.15556	1.15556
969	n_maldiventre	4	granito	1.85178	30.341	16.3848	1	0.0157	1.85	2.91	62.74	23.5	17.6667	41.1667	0.120331	c	1.35556	1.35556
970	n_maldiventre	4	granito	1.85178	30.341	16.3848	1	0.0157	1.85	2.91	62.74	23.5	17.6667	41.1667	0.120331	d	3.08889	3.08889
971	n_maldiventre	4	granito	1.85178	30.341	16.3848	1	0.0157	1.85	2.91	62.74	23.5	17.6667	41.1667	0.120331	e	3.02222	3.02222
972	n_maldiventre	4	granito	1.85178	30.341	16.3848	1	0.0157	1.85	2.91	62.74	23.5	17.6667	41.1667	0.120331	f	1.73333	1.73333
973	n_maldiventre	4	granito	1.85178	30.341	16.3848	1	0.0157	1.85	2.91	62.74	23.5	17.6667	41.1667	0.120331	g	0.311111	0.311111
974	n_maldiventre	4	granito	1.85178	30.341	16.3848	1	0.0157	1.85	2.91	62.74	23.5	17.6667	41.1667	0.120331	rec	1.2	1.2
975	n_maldiventre	4	granito	1.85178	30.341	16.3848	1	0.0157	1.85	2.91	62.74	23.5	17.6667	41.1667	0.120331	young	7.46667	7.46667
976	n_maldiventre	4	granito	1.85178	30.341	16.3848	1	0.0157	1.85	2.91	62.74	23.5	17.6667	41.1667	0.120331	undersize	8.66667	8.66667
977	n_maldiventre	4	granito	1.85178	30.341	16.3848	1	0.0157	1.85	2.91	62.74	23.5	17.6667	41.1667	0.120331	stock	2.04444	2.04444
978	n_maldiventre	4	granito	1.85178	30.341	16.3848	1	0.0157	1.85	2.91	62.74	23.5	17.6667	41.1667	0.120331	fertile	8.15556	8.15556
979	n_maldiventre	4	granito	1.85178	30.341	16.3848	1	0.0157	1.85	2.91	62.74	23.5	17.6667	41.1667	0.120331	tot	10.7111	10.7111
980	n_maldiventre	4	granito	1.85178	30.341	16.3848	1	0.0157	1.85	2.91	62.74	23.5	17.6667	41.1667	0.120331	stockper	19.0871	19.0871
981	n_maldiventre	4	granito	1.85178	30.341	16.3848	1	0.0157	1.85	2.91	62.74	20.6667	38.8333	59.5	0.090058	a	0.355556	0.355556
982	n_maldiventre	4	granito	1.85178	30.341	16.3848	1	0.0157	1.85	2.91	62.74	20.6667	38.8333	59.5	0.090058	b	1.08889	1.08889
983	n_maldiventre	4	granito	1.85178	30.341	16.3848	1	0.0157	1.85	2.91	62.74	20.6667	38.8333	59.5	0.090058	c	0.755556	0.755556
984	n_maldiventre	4	granito	1.85178	30.341	16.3848	1	0.0157	1.85	2.91	62.74	20.6667	38.8333	59.5	0.090058	d	1.33333	1.33333
985	n_maldiventre	4	granito	1.85178	30.341	16.3848	1	0.0157	1.85	2.91	62.74	20.6667	38.8333	59.5	0.090058	e	1.31111	1.31111
986	n_maldiventre	4	granito	1.85178	30.341	16.3848	1	0.0157	1.85	2.91	62.74	20.6667	38.8333	59.5	0.090058	f	1.28889	1.28889
987	n_maldiventre	4	granito	1.85178	30.341	16.3848	1	0.0157	1.85	2.91	62.74	20.6667	38.8333	59.5	0.090058	g	0.288889	0.288889
988	n_maldiventre	4	granito	1.85178	30.341	16.3848	1	0.0157	1.85	2.91	62.74	20.6667	38.8333	59.5	0.090058	rec	1.44444	1.44444
989	n_maldiventre	4	granito	1.85178	30.341	16.3848	1	0.0157	1.85	2.91	62.74	20.6667	38.8333	59.5	0.090058	young	3.4	3.4
990	n_maldiventre	4	granito	1.85178	30.341	16.3848	1	0.0157	1.85	2.91	62.74	20.6667	38.8333	59.5	0.090058	undersize	4.84445	4.84445
991	n_maldiventre	4	granito	1.85178	30.341	16.3848	1	0.0157	1.85	2.91	62.74	20.6667	38.8333	59.5	0.090058	stock	1.57778	1.57778
992	n_maldiventre	4	granito	1.85178	30.341	16.3848	1	0.0157	1.85	2.91	62.74	20.6667	38.8333	59.5	0.090058	fertile	4.22222	4.22222
993	n_maldiventre	4	granito	1.85178	30.341	16.3848	1	0.0157	1.85	2.91	62.74	20.6667	38.8333	59.5	0.090058	tot	6.42222	6.42222
994	n_maldiventre	4	granito	1.85178	30.341	16.3848	1	0.0157	1.85	2.91	62.74	20.6667	38.8333	59.5	0.090058	stockper	24.5675	24.5675
995	n_maldiventre	4	granito	1.85178	30.341	16.3848	1	0.0157	1.85	2.91	62.74	20.6667	38.8333	59.5	0.112368	a	0.155556	0.155556
996	n_maldiventre	4	granito	1.85178	30.341	16.3848	1	0.0157	1.85	2.91	62.74	20.6667	38.8333	59.5	0.112368	b	0.577778	0.577778
997	n_maldiventre	4	granito	1.85178	30.341	16.3848	1	0.0157	1.85	2.91	62.74	20.6667	38.8333	59.5	0.112368	c	0.555556	0.555556
998	n_maldiventre	4	granito	1.85178	30.341	16.3848	1	0.0157	1.85	2.91	62.74	20.6667	38.8333	59.5	0.112368	d	0.577778	0.577778
999	n_maldiventre	4	granito	1.85178	30.341	16.3848	1	0.0157	1.85	2.91	62.74	20.6667	38.8333	59.5	0.112368	e	0.755556	0.755556
1000	n_maldiventre	4	granito	1.85178	30.341	16.3848	1	0.0157	1.85	2.91	62.74	20.6667	38.8333	59.5	0.112368	f	1.04444	1.04444
1001	n_maldiventre	4	granito	1.85178	30.341	16.3848	1	0.0157	1.85	2.91	62.74	20.6667	38.8333	59.5	0.112368	g	0.444444	0.444444
1002	n_maldiventre	4	granito	1.85178	30.341	16.3848	1	0.0157	1.85	2.91	62.74	20.6667	38.8333	59.5	0.112368	rec	0.733334	0.733334
1003	n_maldiventre	4	granito	1.85178	30.341	16.3848	1	0.0157	1.85	2.91	62.74	20.6667	38.8333	59.5	0.112368	young	1.88889	1.88889
1004	n_maldiventre	4	granito	1.85178	30.341	16.3848	1	0.0157	1.85	2.91	62.74	20.6667	38.8333	59.5	0.112368	undersize	2.62222	2.62222
1005	n_maldiventre	4	granito	1.85178	30.341	16.3848	1	0.0157	1.85	2.91	62.74	20.6667	38.8333	59.5	0.112368	stock	1.48889	1.48889
1006	n_maldiventre	4	granito	1.85178	30.341	16.3848	1	0.0157	1.85	2.91	62.74	20.6667	38.8333	59.5	0.112368	fertile	2.82222	2.82222
1007	n_maldiventre	4	granito	1.85178	30.341	16.3848	1	0.0157	1.85	2.91	62.74	20.6667	38.8333	59.5	0.112368	tot	4.11111	4.11111
1008	n_maldiventre	4	granito	1.85178	30.341	16.3848	1	0.0157	1.85	2.91	62.74	20.6667	38.8333	59.5	0.112368	stockper	36.2162	36.2162
1009	n_maldiventre	4	granito	1.85178	30.341	16.3848	1	0.0157	1.85	2.91	62.74	20.6667	38.8333	59.5	0.078624	a	0.311111	0.311111
1010	n_maldiventre	4	granito	1.85178	30.341	16.3848	1	0.0157	1.85	2.91	62.74	20.6667	38.8333	59.5	0.078624	b	2.71111	2.71111
1011	n_maldiventre	4	granito	1.85178	30.341	16.3848	1	0.0157	1.85	2.91	62.74	20.6667	38.8333	59.5	0.078624	c	3.46667	3.46667
1012	n_maldiventre	4	granito	1.85178	30.341	16.3848	1	0.0157	1.85	2.91	62.74	20.6667	38.8333	59.5	0.078624	d	0.533333	0.533333
1013	n_maldiventre	4	granito	1.85178	30.341	16.3848	1	0.0157	1.85	2.91	62.74	20.6667	38.8333	59.5	0.078624	e	1	1
1014	n_maldiventre	4	granito	1.85178	30.341	16.3848	1	0.0157	1.85	2.91	62.74	20.6667	38.8333	59.5	0.078624	f	1.04444	1.04444
1015	n_maldiventre	4	granito	1.85178	30.341	16.3848	1	0.0157	1.85	2.91	62.74	20.6667	38.8333	59.5	0.078624	g	0.511111	0.511111
1016	n_maldiventre	4	granito	1.85178	30.341	16.3848	1	0.0157	1.85	2.91	62.74	20.6667	38.8333	59.5	0.078624	rec	3.02222	3.02222
1017	n_maldiventre	4	granito	1.85178	30.341	16.3848	1	0.0157	1.85	2.91	62.74	20.6667	38.8333	59.5	0.078624	young	5	5
1018	n_maldiventre	4	granito	1.85178	30.341	16.3848	1	0.0157	1.85	2.91	62.74	20.6667	38.8333	59.5	0.078624	undersize	8.02222	8.02222
1019	n_maldiventre	4	granito	1.85178	30.341	16.3848	1	0.0157	1.85	2.91	62.74	20.6667	38.8333	59.5	0.078624	stock	1.55556	1.55556
1020	n_maldiventre	4	granito	1.85178	30.341	16.3848	1	0.0157	1.85	2.91	62.74	20.6667	38.8333	59.5	0.078624	fertile	3.08889	3.08889
1021	n_maldiventre	4	granito	1.85178	30.341	16.3848	1	0.0157	1.85	2.91	62.74	20.6667	38.8333	59.5	0.078624	tot	9.57778	9.57778
1022	n_maldiventre	4	granito	1.85178	30.341	16.3848	1	0.0157	1.85	2.91	62.74	20.6667	38.8333	59.5	0.078624	stockper	16.2413	16.2413
1023	o_catalano	4	basalto	0.080576	1.725	21.4084	1	0.0157	0.08	0.13	0	104.833	6.66667	111.5	0.0980395	a	0.33	0.33
1024	o_catalano	4	basalto	0.080576	1.725	21.4084	1	0.0157	0.08	0.13	0	104.833	6.66667	111.5	0.0980395	b	0.47	0.47
1025	o_catalano	4	basalto	0.080576	1.725	21.4084	1	0.0157	0.08	0.13	0	104.833	6.66667	111.5	0.0980395	c	0.13	0.13
1026	o_catalano	4	basalto	0.080576	1.725	21.4084	1	0.0157	0.08	0.13	0	104.833	6.66667	111.5	0.0980395	d	0	0
1027	o_catalano	4	basalto	0.080576	1.725	21.4084	1	0.0157	0.08	0.13	0	104.833	6.66667	111.5	0.0980395	e	0	0
1028	o_catalano	4	basalto	0.080576	1.725	21.4084	1	0.0157	0.08	0.13	0	104.833	6.66667	111.5	0.0980395	f	0	0
1029	o_catalano	4	basalto	0.080576	1.725	21.4084	1	0.0157	0.08	0.13	0	104.833	6.66667	111.5	0.0980395	g	0	0
1030	o_catalano	4	basalto	0.080576	1.725	21.4084	1	0.0157	0.08	0.13	0	104.833	6.66667	111.5	0.0980395	rec	0.8	0.8
1031	o_catalano	4	basalto	0.080576	1.725	21.4084	1	0.0157	0.08	0.13	0	104.833	6.66667	111.5	0.0980395	young	0.13	0.13
1032	o_catalano	4	basalto	0.080576	1.725	21.4084	1	0.0157	0.08	0.13	0	104.833	6.66667	111.5	0.0980395	undersize	0.93	0.93
1033	o_catalano	4	basalto	0.080576	1.725	21.4084	1	0.0157	0.08	0.13	0	104.833	6.66667	111.5	0.0980395	stock	0	0
1034	o_catalano	4	basalto	0.080576	1.725	21.4084	1	0.0157	0.08	0.13	0	104.833	6.66667	111.5	0.0980395	fertile	0	0
1035	o_catalano	4	basalto	0.080576	1.725	21.4084	1	0.0157	0.08	0.13	0	104.833	6.66667	111.5	0.0980395	tot	0.93	0.93
1036	o_catalano	4	basalto	0.080576	1.725	21.4084	1	0.0157	0.08	0.13	0	104.833	6.66667	111.5	0.0980395	stockper	0	0
1037	o_catalano	4	basalto	0.080576	1.725	21.4084	1	0.0157	0.08	0.13	0	104.833	6.66667	111.5	0.0897135	a	3.67	3.67
1038	o_catalano	4	basalto	0.080576	1.725	21.4084	1	0.0157	0.08	0.13	0	104.833	6.66667	111.5	0.0897135	b	2.67	2.67
1039	o_catalano	4	basalto	0.080576	1.725	21.4084	1	0.0157	0.08	0.13	0	104.833	6.66667	111.5	0.0897135	c	0.13	0.13
1040	o_catalano	4	basalto	0.080576	1.725	21.4084	1	0.0157	0.08	0.13	0	104.833	6.66667	111.5	0.0897135	d	0.133333	0.133333
1041	o_catalano	4	basalto	0.080576	1.725	21.4084	1	0.0157	0.08	0.13	0	104.833	6.66667	111.5	0.0897135	e	0.4	0.4
1042	o_catalano	4	basalto	0.080576	1.725	21.4084	1	0.0157	0.08	0.13	0	104.833	6.66667	111.5	0.0897135	f	0.866667	0.866667
1043	o_catalano	4	basalto	0.080576	1.725	21.4084	1	0.0157	0.08	0.13	0	104.833	6.66667	111.5	0.0897135	g	0.533333	0.533333
1044	o_catalano	4	basalto	0.080576	1.725	21.4084	1	0.0157	0.08	0.13	0	104.833	6.66667	111.5	0.0897135	rec	6.34	6.34
1045	o_catalano	4	basalto	0.080576	1.725	21.4084	1	0.0157	0.08	0.13	0	104.833	6.66667	111.5	0.0897135	young	0.663333	0.663333
1046	o_catalano	4	basalto	0.080576	1.725	21.4084	1	0.0157	0.08	0.13	0	104.833	6.66667	111.5	0.0897135	undersize	7.00333	7.00333
1047	o_catalano	4	basalto	0.080576	1.725	21.4084	1	0.0157	0.08	0.13	0	104.833	6.66667	111.5	0.0897135	stock	1.4	1.4
1048	o_catalano	4	basalto	0.080576	1.725	21.4084	1	0.0157	0.08	0.13	0	104.833	6.66667	111.5	0.0897135	fertile	1.93333	1.93333
1049	o_catalano	4	basalto	0.080576	1.725	21.4084	1	0.0157	0.08	0.13	0	104.833	6.66667	111.5	0.0897135	tot	8.40333	8.40333
1050	o_catalano	4	basalto	0.080576	1.725	21.4084	1	0.0157	0.08	0.13	0	104.833	6.66667	111.5	0.0897135	stockper	16.6601	16.6601
1051	o_catalano	4	basalto	0.080576	1.725	21.4084	1	0.0157	0.08	0.13	0	104.833	6.66667	111.5	0.0968885	a	0.53	0.53
1052	o_catalano	4	basalto	0.080576	1.725	21.4084	1	0.0157	0.08	0.13	0	104.833	6.66667	111.5	0.0968885	b	0.4	0.4
1053	o_catalano	4	basalto	0.080576	1.725	21.4084	1	0.0157	0.08	0.13	0	104.833	6.66667	111.5	0.0968885	c	0.2	0.2
1054	o_catalano	4	basalto	0.080576	1.725	21.4084	1	0.0157	0.08	0.13	0	104.833	6.66667	111.5	0.0968885	d	0.2	0.2
1055	o_catalano	4	basalto	0.080576	1.725	21.4084	1	0.0157	0.08	0.13	0	104.833	6.66667	111.5	0.0968885	e	0.0666667	0.0666667
1056	o_catalano	4	basalto	0.080576	1.725	21.4084	1	0.0157	0.08	0.13	0	104.833	6.66667	111.5	0.0968885	f	0.666667	0.666667
1057	o_catalano	4	basalto	0.080576	1.725	21.4084	1	0.0157	0.08	0.13	0	104.833	6.66667	111.5	0.0968885	g	0.466667	0.466667
1058	o_catalano	4	basalto	0.080576	1.725	21.4084	1	0.0157	0.08	0.13	0	104.833	6.66667	111.5	0.0968885	rec	0.93	0.93
1059	o_catalano	4	basalto	0.080576	1.725	21.4084	1	0.0157	0.08	0.13	0	104.833	6.66667	111.5	0.0968885	young	0.466667	0.466667
1060	o_catalano	4	basalto	0.080576	1.725	21.4084	1	0.0157	0.08	0.13	0	104.833	6.66667	111.5	0.0968885	undersize	1.39667	1.39667
1061	o_catalano	4	basalto	0.080576	1.725	21.4084	1	0.0157	0.08	0.13	0	104.833	6.66667	111.5	0.0968885	stock	1.13333	1.13333
1062	o_catalano	4	basalto	0.080576	1.725	21.4084	1	0.0157	0.08	0.13	0	104.833	6.66667	111.5	0.0968885	fertile	1.4	1.4
1063	o_catalano	4	basalto	0.080576	1.725	21.4084	1	0.0157	0.08	0.13	0	104.833	6.66667	111.5	0.0968885	tot	2.53	2.53
1064	o_catalano	4	basalto	0.080576	1.725	21.4084	1	0.0157	0.08	0.13	0	104.833	6.66667	111.5	0.0968885	stockper	44.7958	44.7958
1065	q_tharros	5	posimatsabbia	14.472	30.465	2.1051	4	0.1539	3.7	42.64	5.51	70.5	24.6667	95.1667	0.0693175	a	0	0
1066	q_tharros	5	posimatsabbia	14.472	30.465	2.1051	4	0.1539	3.7	42.64	5.51	70.5	24.6667	95.1667	0.0693175	b	0	0
1067	q_tharros	5	posimatsabbia	14.472	30.465	2.1051	4	0.1539	3.7	42.64	5.51	70.5	24.6667	95.1667	0.0693175	c	0.85	0.85
1068	q_tharros	5	posimatsabbia	14.472	30.465	2.1051	4	0.1539	3.7	42.64	5.51	70.5	24.6667	95.1667	0.0693175	d	0.3	0.3
1069	q_tharros	5	posimatsabbia	14.472	30.465	2.1051	4	0.1539	3.7	42.64	5.51	70.5	24.6667	95.1667	0.0693175	e	1.13333	1.13333
1070	q_tharros	5	posimatsabbia	14.472	30.465	2.1051	4	0.1539	3.7	42.64	5.51	70.5	24.6667	95.1667	0.0693175	f	0.0666667	0.0666667
1071	q_tharros	5	posimatsabbia	14.472	30.465	2.1051	4	0.1539	3.7	42.64	5.51	70.5	24.6667	95.1667	0.0693175	g	0	0
1072	q_tharros	5	posimatsabbia	14.472	30.465	2.1051	4	0.1539	3.7	42.64	5.51	70.5	24.6667	95.1667	0.0693175	rec	0	0
1073	q_tharros	5	posimatsabbia	14.472	30.465	2.1051	4	0.1539	3.7	42.64	5.51	70.5	24.6667	95.1667	0.0693175	young	2.28333	2.28333
1074	q_tharros	5	posimatsabbia	14.472	30.465	2.1051	4	0.1539	3.7	42.64	5.51	70.5	24.6667	95.1667	0.0693175	undersize	2.28333	2.28333
1075	q_tharros	5	posimatsabbia	14.472	30.465	2.1051	4	0.1539	3.7	42.64	5.51	70.5	24.6667	95.1667	0.0693175	stock	0.0666667	0.0666667
1076	q_tharros	5	posimatsabbia	14.472	30.465	2.1051	4	0.1539	3.7	42.64	5.51	70.5	24.6667	95.1667	0.0693175	fertile	1.5	1.5
1077	q_tharros	5	posimatsabbia	14.472	30.465	2.1051	4	0.1539	3.7	42.64	5.51	70.5	24.6667	95.1667	0.0693175	tot	2.35	2.35
1078	q_tharros	5	posimatsabbia	14.472	30.465	2.1051	4	0.1539	3.7	42.64	5.51	70.5	24.6667	95.1667	0.0693175	stockper	2.83688	2.83688
1079	q_tharros	5	posimatsabbia	14.472	30.465	2.1051	4	0.1539	3.7	42.64	5.51	70.5	24.6667	95.1667	0.0786363	a	0	0
1080	q_tharros	5	posimatsabbia	14.472	30.465	2.1051	4	0.1539	3.7	42.64	5.51	70.5	24.6667	95.1667	0.0786363	b	0	0
1081	q_tharros	5	posimatsabbia	14.472	30.465	2.1051	4	0.1539	3.7	42.64	5.51	70.5	24.6667	95.1667	0.0786363	c	0.04	0.04
1082	q_tharros	5	posimatsabbia	14.472	30.465	2.1051	4	0.1539	3.7	42.64	5.51	70.5	24.6667	95.1667	0.0786363	d	1.15556	1.15556
1083	q_tharros	5	posimatsabbia	14.472	30.465	2.1051	4	0.1539	3.7	42.64	5.51	70.5	24.6667	95.1667	0.0786363	e	1	1
1084	q_tharros	5	posimatsabbia	14.472	30.465	2.1051	4	0.1539	3.7	42.64	5.51	70.5	24.6667	95.1667	0.0786363	f	0.0222222	0.0222222
1085	q_tharros	5	posimatsabbia	14.472	30.465	2.1051	4	0.1539	3.7	42.64	5.51	70.5	24.6667	95.1667	0.0786363	g	0	0
1086	q_tharros	5	posimatsabbia	14.472	30.465	2.1051	4	0.1539	3.7	42.64	5.51	70.5	24.6667	95.1667	0.0786363	rec	0	0
1087	q_tharros	5	posimatsabbia	14.472	30.465	2.1051	4	0.1539	3.7	42.64	5.51	70.5	24.6667	95.1667	0.0786363	young	2.19556	2.19556
1088	q_tharros	5	posimatsabbia	14.472	30.465	2.1051	4	0.1539	3.7	42.64	5.51	70.5	24.6667	95.1667	0.0786363	undersize	2.19556	2.19556
1089	q_tharros	5	posimatsabbia	14.472	30.465	2.1051	4	0.1539	3.7	42.64	5.51	70.5	24.6667	95.1667	0.0786363	stock	0.0222222	0.0222222
1090	q_tharros	5	posimatsabbia	14.472	30.465	2.1051	4	0.1539	3.7	42.64	5.51	70.5	24.6667	95.1667	0.0786363	fertile	2.17778	2.17778
1091	q_tharros	5	posimatsabbia	14.472	30.465	2.1051	4	0.1539	3.7	42.64	5.51	70.5	24.6667	95.1667	0.0786363	tot	2.21778	2.21778
1092	q_tharros	5	posimatsabbia	14.472	30.465	2.1051	4	0.1539	3.7	42.64	5.51	70.5	24.6667	95.1667	0.0786363	stockper	1.002	1.002
1093	q_tharros	5	posimatsabbia	14.472	30.465	2.1051	4	0.1539	3.7	42.64	5.51	70.5	24.6667	95.1667	0.0686723	a	0	0
1094	q_tharros	5	posimatsabbia	14.472	30.465	2.1051	4	0.1539	3.7	42.64	5.51	70.5	24.6667	95.1667	0.0686723	b	0	0
1095	q_tharros	5	posimatsabbia	14.472	30.465	2.1051	4	0.1539	3.7	42.64	5.51	70.5	24.6667	95.1667	0.0686723	c	0.04	0.04
1096	q_tharros	5	posimatsabbia	14.472	30.465	2.1051	4	0.1539	3.7	42.64	5.51	70.5	24.6667	95.1667	0.0686723	d	0.133333	0.133333
1097	q_tharros	5	posimatsabbia	14.472	30.465	2.1051	4	0.1539	3.7	42.64	5.51	70.5	24.6667	95.1667	0.0686723	e	1.13333	1.13333
1098	q_tharros	5	posimatsabbia	14.472	30.465	2.1051	4	0.1539	3.7	42.64	5.51	70.5	24.6667	95.1667	0.0686723	f	1.6	1.6
1099	q_tharros	5	posimatsabbia	14.472	30.465	2.1051	4	0.1539	3.7	42.64	5.51	70.5	24.6667	95.1667	0.0686723	g	0.0666667	0.0666667
1100	q_tharros	5	posimatsabbia	14.472	30.465	2.1051	4	0.1539	3.7	42.64	5.51	70.5	24.6667	95.1667	0.0686723	rec	0	0
1101	q_tharros	5	posimatsabbia	14.472	30.465	2.1051	4	0.1539	3.7	42.64	5.51	70.5	24.6667	95.1667	0.0686723	young	1.30667	1.30667
1102	q_tharros	5	posimatsabbia	14.472	30.465	2.1051	4	0.1539	3.7	42.64	5.51	70.5	24.6667	95.1667	0.0686723	undersize	1.30667	1.30667
1103	q_tharros	5	posimatsabbia	14.472	30.465	2.1051	4	0.1539	3.7	42.64	5.51	70.5	24.6667	95.1667	0.0686723	stock	1.66667	1.66667
1104	q_tharros	5	posimatsabbia	14.472	30.465	2.1051	4	0.1539	3.7	42.64	5.51	70.5	24.6667	95.1667	0.0686723	fertile	2.93333	2.93333
1105	q_tharros	5	posimatsabbia	14.472	30.465	2.1051	4	0.1539	3.7	42.64	5.51	70.5	24.6667	95.1667	0.0686723	tot	2.97333	2.97333
1106	q_tharros	5	posimatsabbia	14.472	30.465	2.1051	4	0.1539	3.7	42.64	5.51	70.5	24.6667	95.1667	0.0686723	stockper	56.0538	56.0538

## Sheet: tabpred
year	site	zone	sector	class	urchin_den	sparid_den	sparid_bio	labrid_den	labrid_bio	pred_den	pred_bio
2004	mal	A	4	a	4	24.8	1371.5	68.8	850.9	93.7	2222.4
2004	mal	A	4	b	2.7	24.8	1371.5	68.8	850.9	93.7	2222.4
2004	mal	A	4	c	0.6	24.8	1371.5	68.8	850.9	93.7	2222.4
2004	mal	A	4	d	0.2	24.8	1371.5	68.8	850.9	93.7	2222.4
2004	mal	A	4	e	0.8	24.8	1371.5	68.8	850.9	93.7	2222.4
2004	mal	A	4	f	2.9	24.8	1371.5	68.8	850.9	93.7	2222.4
2004	mal	A	4	g	1.4	24.8	1371.5	68.8	850.9	93.7	2222.4
2004	mal	A	4	rec	6.8	24.8	1371.5	68.8	850.9	93.7	2222.4
2004	mal	A	4	cde	1.7	24.8	1371.5	68.8	850.9	93.7	2222.4
2004	mal	A	4	subsize	8.4	24.8	1371.5	68.8	850.9	93.7	2222.4
2004	mal	A	4	tot	10.1	24.8	1371.5	68.8	850.9	93.7	2222.4
2004	mal	B	4	a	2.9	48.2	4234.9	78.3	1156.8	126.5	5391.7
2004	mal	B	4	b	3.3	48.2	4234.9	78.3	1156.8	126.5	5391.7
2004	mal	B	4	c	1	48.2	4234.9	78.3	1156.8	126.5	5391.7
2004	mal	B	4	d	1.3	48.2	4234.9	78.3	1156.8	126.5	5391.7
2004	mal	B	4	e	2.1	48.2	4234.9	78.3	1156.8	126.5	5391.7
2004	mal	B	4	f	2.8	48.2	4234.9	78.3	1156.8	126.5	5391.7
2004	mal	B	4	g	0.5	48.2	4234.9	78.3	1156.8	126.5	5391.7
2004	mal	B	4	rec	6.1	48.2	4234.9	78.3	1156.8	126.5	5391.7
2004	mal	B	4	cde	4.4	48.2	4234.9	78.3	1156.8	126.5	5391.7
2004	mal	B	4	subsize	10.5	48.2	4234.9	78.3	1156.8	126.5	5391.7
2004	mal	B	4	tot	11.6	48.2	4234.9	78.3	1156.8	126.5	5391.7
2004	mal	C	4	a	0.8	24.2	2696.9	83	1987.6	107.2	4684.6
2004	mal	C	4	b	3	24.2	2696.9	83	1987.6	107.2	4684.6
2004	mal	C	4	c	0.7	24.2	2696.9	83	1987.6	107.2	4684.6
2004	mal	C	4	d	0.3	24.2	2696.9	83	1987.6	107.2	4684.6
2004	mal	C	4	e	0.9	24.2	2696.9	83	1987.6	107.2	4684.6
2004	mal	C	4	f	3.2	24.2	2696.9	83	1987.6	107.2	4684.6
2004	mal	C	4	g	1	24.2	2696.9	83	1987.6	107.2	4684.6
2004	mal	C	4	rec	3.8	24.2	2696.9	83	1987.6	107.2	4684.6
2004	mal	C	4	cde	1.9	24.2	2696.9	83	1987.6	107.2	4684.6
2004	mal	C	4	subsize	5.7	24.2	2696.9	83	1987.6	107.2	4684.6
2004	mal	C	4	tot	5.7	24.2	2696.9	83	1987.6	107.2	4684.6
2004	cat	A	4	a	1.5	32.3	4844.6	47.7	925.1	80	5769.8
2004	cat	A	4	b	1.2	32.3	4844.6	47.7	925.1	80	5769.8
2004	cat	A	4	c	0.2	32.3	4844.6	47.7	925.1	80	5769.8
2004	cat	A	4	d	0.1	32.3	4844.6	47.7	925.1	80	5769.8
2004	cat	A	4	e	0.2	32.3	4844.6	47.7	925.1	80	5769.8
2004	cat	A	4	f	0.5	32.3	4844.6	47.7	925.1	80	5769.8
2004	cat	A	4	g	0.3	32.3	4844.6	47.7	925.1	80	5769.8
2004	cat	A	4	rec	2.7	32.3	4844.6	47.7	925.1	80	5769.8
2004	cat	A	4	cde	0.4	32.3	4844.6	47.7	925.1	80	5769.8
2004	cat	A	4	subsize	3.1	32.3	4844.6	47.7	925.1	80	5769.8
2004	cat	A	4	tot	3.4	32.3	4844.6	47.7	925.1	80	5769.8
2004	seu	B	2	a	1.3	8.5	985.4	47.3	850.4	55.8	1835.8
2004	seu	B	2	b	1.8	8.5	985.4	47.3	850.4	55.8	1835.8
2004	seu	B	2	c	2.2	8.5	985.4	47.3	850.4	55.8	1835.8
2004	seu	B	2	d	2.2	8.5	985.4	47.3	850.4	55.8	1835.8
2004	seu	B	2	e	3.1	8.5	985.4	47.3	850.4	55.8	1835.8
2004	seu	B	2	f	3	8.5	985.4	47.3	850.4	55.8	1835.8
2004	seu	B	2	g	0.2	8.5	985.4	47.3	850.4	55.8	1835.8
2004	seu	B	2	rec	3.1	8.5	985.4	47.3	850.4	55.8	1835.8
2004	seu	B	2	cde	7.5	8.5	985.4	47.3	850.4	55.8	1835.8
2004	seu	B	2	subsize	10.7	8.5	985.4	47.3	850.4	55.8	1835.8
2004	seu	B	2	tot	8.5	8.5	985.4	47.3	850.4	55.8	1835.8
2004	funtana	C	3	a	0.7	10.2	964.2	87.3	1174.5	97.5	2138.7
2004	funtana	C	3	b	1.3	10.2	964.2	87.3	1174.5	97.5	2138.7
2004	funtana	C	3	c	1.5	10.2	964.2	87.3	1174.5	97.5	2138.7
2004	funtana	C	3	d	1.1	10.2	964.2	87.3	1174.5	97.5	2138.7
2004	funtana	C	3	e	1.2	10.2	964.2	87.3	1174.5	97.5	2138.7
2004	funtana	C	3	f	1.1	10.2	964.2	87.3	1174.5	97.5	2138.7
2004	funtana	C	3	g	0.1	10.2	964.2	87.3	1174.5	97.5	2138.7
2004	funtana	C	3	rec	1.9	10.2	964.2	87.3	1174.5	97.5	2138.7
2004	funtana	C	3	cde	3.8	10.2	964.2	87.3	1174.5	97.5	2138.7
2004	funtana	C	3	subsize	5.7	10.2	964.2	87.3	1174.5	97.5	2138.7
2004	funtana	C	3	tot	5.2	10.2	964.2	87.3	1174.5	97.5	2138.7
2004	portosuedda	C	2	a	0.3	7.8	613.1	37.3	524.2	45.2	1137.3
2004	portosuedda	C	2	b	0.6	7.8	613.1	37.3	524.2	45.2	1137.3
2004	portosuedda	C	2	c	1.1	7.8	613.1	37.3	524.2	45.2	1137.3
2004	portosuedda	C	2	d	1.6	7.8	613.1	37.3	524.2	45.2	1137.3
2004	portosuedda	C	2	e	2.3	7.8	613.1	37.3	524.2	45.2	1137.3
2004	portosuedda	C	2	f	1.9	7.8	613.1	37.3	524.2	45.2	1137.3
2004	portosuedda	C	2	g	0.3	7.8	613.1	37.3	524.2	45.2	1137.3
2004	portosuedda	C	2	rec	0.9	7.8	613.1	37.3	524.2	45.2	1137.3
2004	portosuedda	C	2	cde	4.9	7.8	613.1	37.3	524.2	45.2	1137.3
2004	portosuedda	C	2	subsize	5.9	7.8	613.1	37.3	524.2	45.2	1137.3
2004	portosuedda	C	2	tot	5	7.8	613.1	37.3	524.2	45.2	1137.3
2004	sutingiosu	C	1	a	2.3	16	848.5	26.7	296.9	42.7	1145.4
2004	sutingiosu	C	1	b	2.3	16	848.5	26.7	296.9	42.7	1145.4
2004	sutingiosu	C	1	c	1.5	16	848.5	26.7	296.9	42.7	1145.4
2004	sutingiosu	C	1	d	1.7	16	848.5	26.7	296.9	42.7	1145.4
2004	sutingiosu	C	1	e	1.8	16	848.5	26.7	296.9	42.7	1145.4
2004	sutingiosu	C	1	f	1.1	16	848.5	26.7	296.9	42.7	1145.4
2004	sutingiosu	C	1	g	0.1	16	848.5	26.7	296.9	42.7	1145.4
2004	sutingiosu	C	1	rec	4.6	16	848.5	26.7	296.9	42.7	1145.4
2004	sutingiosu	C	1	cde	5	16	848.5	26.7	296.9	42.7	1145.4
2004	sutingiosu	C	1	subsize	9.5	16	848.5	26.7	296.9	42.7	1145.4
2004	sutingiosu	C	1	tot	8.4	16	848.5	26.7	296.9	42.7	1145.4
2004	potzuidu	C	1	a	1.2	4	299	36	360.5	40	659.5
2004	potzuidu	C	1	b	2.9	4	299	36	360.5	40	659.5
2004	potzuidu	C	1	c	2.3	4	299	36	360.5	40	659.5
2004	potzuidu	C	1	d	2.1	4	299	36	360.5	40	659.5
2004	potzuidu	C	1	e	2.6	4	299	36	360.5	40	659.5
2004	potzuidu	C	1	f	1.2	4	299	36	360.5	40	659.5
2004	potzuidu	C	1	g	0	4	299	36	360.5	40	659.5
2004	potzuidu	C	1	rec	4.1	4	299	36	360.5	40	659.5
2004	potzuidu	C	1	cde	7	4	299	36	360.5	40	659.5
2004	potzuidu	C	1	subsize	11.1	4	299	36	360.5	40	659.5
2004	potzuidu	C	1	tot	9.4	4	299	36	360.5	40	659.5
2004	supallosu	out	1	a	2.2	2.3	185.8	123.7	410.2	126	596
2004	supallosu	out	1	b	1.9	2.3	185.8	123.7	410.2	126	596
2004	supallosu	out	1	c	1.2	2.3	185.8	123.7	410.2	126	596
2004	supallosu	out	1	d	1	2.3	185.8	123.7	410.2	126	596
2004	supallosu	out	1	e	1.4	2.3	185.8	123.7	410.2	126	596
2004	supallosu	out	1	f	1.1	2.3	185.8	123.7	410.2	126	596
2004	supallosu	out	1	g	0.1	2.3	185.8	123.7	410.2	126	596
2004	supallosu	out	1	rec	4.1	2.3	185.8	123.7	410.2	126	596
2004	supallosu	out	1	cde	3.6	2.3	185.8	123.7	410.2	126	596
2004	supallosu	out	1	subsize	7.7	2.3	185.8	123.7	410.2	126	596
2004	supallosu	out	1	tot	7.1	2.3	185.8	123.7	410.2	126	596
2004	scaesali	out	1	a	1.5	8.7	638.8	61	725.3	69.7	1364.1
2004	scaesali	out	1	b	1.2	8.7	638.8	61	725.3	69.7	1364.1
2004	scaesali	out	1	c	1.3	8.7	638.8	61	725.3	69.7	1364.1
2004	scaesali	out	1	d	1.3	8.7	638.8	61	725.3	69.7	1364.1
2004	scaesali	out	1	e	1.6	8.7	638.8	61	725.3	69.7	1364.1
2004	scaesali	out	1	f	0.7	8.7	638.8	61	725.3	69.7	1364.1
2004	scaesali	out	1	g	0	8.7	638.8	61	725.3	69.7	1364.1
2004	scaesali	out	1	rec	2.7	8.7	638.8	61	725.3	69.7	1364.1
2004	scaesali	out	1	cde	4.2	8.7	638.8	61	725.3	69.7	1364.1
2004	scaesali	out	1	subsize	6.9	8.7	638.8	61	725.3	69.7	1364.1
2004	scaesali	out	1	tot	5.8	8.7	638.8	61	725.3	69.7	1364.1
2007	mal	B	4	a	0.3	32.1	3841.6	22.8	388.4	54.9	4230
2007	mal	B	4	b	1.5	32.1	3841.6	22.8	388.4	54.9	4230
2007	mal	B	4	c	1.6	32.1	3841.6	22.8	388.4	54.9	4230
2007	mal	B	4	d	0.8	32.1	3841.6	22.8	388.4	54.9	4230
2007	mal	B	4	e	1	32.1	3841.6	22.8	388.4	54.9	4230
2007	mal	B	4	f	1.1	32.1	3841.6	22.8	388.4	54.9	4230
2007	mal	B	4	g	0.4	32.1	3841.6	22.8	388.4	54.9	4230
2007	mal	B	4	rec	1.7	32.1	3841.6	22.8	388.4	54.9	4230
2007	mal	B	4	cde	3.4	32.1	3841.6	22.8	388.4	54.9	4230
2007	mal	B	4	subsize	5.2	32.1	3841.6	22.8	388.4	54.9	4230
2007	mal	B	4	tot	5.7	32.1	3841.6	22.8	388.4	54.9	4230
2007	mal	C	4	a	0	23	2845.8	22.3	399.5	45.3	3245.2
2007	mal	C	4	b	1.2	23	2845.8	22.3	399.5	45.3	3245.2
2007	mal	C	4	c	1.4	23	2845.8	22.3	399.5	45.3	3245.2
2007	mal	C	4	d	3.1	23	2845.8	22.3	399.5	45.3	3245.2
2007	mal	C	4	e	3	23	2845.8	22.3	399.5	45.3	3245.2
2007	mal	C	4	f	1.7	23	2845.8	22.3	399.5	45.3	3245.2
2007	mal	C	4	g	0.3	23	2845.8	22.3	399.5	45.3	3245.2
2007	mal	C	4	rec	1.2	23	2845.8	22.3	399.5	45.3	3245.2
2007	mal	C	4	cde	7.5	23	2845.8	22.3	399.5	45.3	3245.2
2007	mal	C	4	subsize	8.7	23	2845.8	22.3	399.5	45.3	3245.2
2007	mal	C	4	tot	4.7	23	2845.8	22.3	399.5	45.3	3245.2
2007	seu	B	2	a	0.2	36.7	2984.6	36.2	573.4	72.9	3558.1
2007	seu	B	2	b	0.6	36.7	2984.6	36.2	573.4	72.9	3558.1
2007	seu	B	2	c	1.2	36.7	2984.6	36.2	573.4	72.9	3558.1
2007	seu	B	2	d	1.8	36.7	2984.6	36.2	573.4	72.9	3558.1
2007	seu	B	2	e	2.1	36.7	2984.6	36.2	573.4	72.9	3558.1
2007	seu	B	2	f	0.8	36.7	2984.6	36.2	573.4	72.9	3558.1
2007	seu	B	2	g	0.1	36.7	2984.6	36.2	573.4	72.9	3558.1
2007	seu	B	2	rec	0.7	36.7	2984.6	36.2	573.4	72.9	3558.1
2007	seu	B	2	cde	5.1	36.7	2984.6	36.2	573.4	72.9	3558.1
2007	seu	B	2	subsize	5.9	36.7	2984.6	36.2	573.4	72.9	3558.1
2007	seu	B	2	tot	4.4	36.7	2984.6	36.2	573.4	72.9	3558.1
2007	funtana	C	3	a	0.4	35.8	6043.8	16.2	242.8	52	6286.6
2007	funtana	C	3	b	2	35.8	6043.8	16.2	242.8	52	6286.6
2007	funtana	C	3	c	1.5	35.8	6043.8	16.2	242.8	52	6286.6
2007	funtana	C	3	d	1.6	35.8	6043.8	16.2	242.8	52	6286.6
2007	funtana	C	3	e	1.6	35.8	6043.8	16.2	242.8	52	6286.6
2007	funtana	C	3	f	0.8	35.8	6043.8	16.2	242.8	52	6286.6
2007	funtana	C	3	g	0.1	35.8	6043.8	16.2	242.8	52	6286.6
2007	funtana	C	3	rec	2.4	35.8	6043.8	16.2	242.8	52	6286.6
2007	funtana	C	3	cde	4.6	35.8	6043.8	16.2	242.8	52	6286.6
2007	funtana	C	3	subsize	7	35.8	6043.8	16.2	242.8	52	6286.6
2007	funtana	C	3	tot	5.9	35.8	6043.8	16.2	242.8	52	6286.6
2007	portosuedda	C	2	a	0	22.4	1852.2	17.7	231.2	40.1	2083.4
2007	portosuedda	C	2	b	0.4	22.4	1852.2	17.7	231.2	40.1	2083.4
2007	portosuedda	C	2	c	0.7	22.4	1852.2	17.7	231.2	40.1	2083.4
2007	portosuedda	C	2	d	1.1	22.4	1852.2	17.7	231.2	40.1	2083.4
2007	portosuedda	C	2	e	2.2	22.4	1852.2	17.7	231.2	40.1	2083.4
2007	portosuedda	C	2	f	0.8	22.4	1852.2	17.7	231.2	40.1	2083.4
2007	portosuedda	C	2	g	0.1	22.4	1852.2	17.7	231.2	40.1	2083.4
2007	portosuedda	C	2	rec	0.5	22.4	1852.2	17.7	231.2	40.1	2083.4
2007	portosuedda	C	2	cde	4	22.4	1852.2	17.7	231.2	40.1	2083.4
2007	portosuedda	C	2	subsize	4.4	22.4	1852.2	17.7	231.2	40.1	2083.4
2007	portosuedda	C	2	tot	3.7	22.4	1852.2	17.7	231.2	40.1	2083.4
